# Supplementary material for: Movement of accessible plasma membrane cholesterol by the GRAMD1 lipid transfer protein complex
Source: eLife. 2019 Nov 14;8:e51401. doi: 10.7554/eLife.51401 (PMC6905856; doi:10.7554/eLife.51401)
Supplement: Figure 2—source data 1. [file elife-51401-fig2-data1.xlsx]

## Sheet: Source data Figure 2 G
Source data for Figure 2 G
Myc-GRAMD1b (WT)						Myc-GRAMD1a (WT)
EGFP	EGFP-GRAMD1b (WT)	EGFP-GRAMD1b (Dhelix)	EGFP-GRAMD1b (4E)	EGFP-GRAMD1b (5E)	EGFP-GRAMD1b (TM swap)	EGFP	EGFP-GRAMD1b (WT)	EGFP-GRAMD1b (Dhelix)	EGFP-GRAMD1b (4E)	EGFP-GRAMD1b (5E)	EGFP-GRAMD1b (TM swap)
0.000952	1	0.276051	0.916904	0.245292	0.004054	0.001601	1	0.113239	0.637427	0.195783	0.001724
0.000753	1	0.123893	0.555412	0.157705	0.001623	0.001253	1	0.111402	0.434055	0.086066	0.000593
0.001238	1	0.140004	0.433521	0.170861	0.00239	0.00459	1	0.079425	0.430257	0.057971	0.003007
