# Supplementary material for: Movement of accessible plasma membrane cholesterol by the GRAMD1 lipid transfer protein complex
Source: eLife. 2019 Nov 14;8:e51401. doi: 10.7554/eLife.51401 (PMC6905856; doi:10.7554/eLife.51401)
Supplement: Figure 3—figure supplement 1—source data 1. [file elife-51401-fig3-figsupp1-data1.xlsx]

## Sheet: Source data Figure 3-S-1 A
Source data for Figure 3-figure supplement 1 A
F/F0 (EGFP) (Left)						Dot Plot (Right)
	Average		SEM			Individual Values
Time (min)	EGFP-GRAMD1b	EGFP-GRAMD1b ΔGRAM	EGFP-GRAMD1b	EGFP-GRAMD1b ΔGRAM		EGFP-GRAMD1b	EGFP-GRAMD1b ΔGRAM
0	0.993947	0.995311	0.0090065	0.00468263		1.29632	0.413241
0.333333	1.00266	0.997226	0.00904839	0.00368024		0.135346	0.469397
0.666667	0.990374	1.00336	0.00523212	0.00238397		2.33002	0.291215
1	0.976658	1.00033	0.00766148	0.00136536		3.13746	0.0967208
1.33333	0.999516	1.00497	0.00678558	0.00223818		0.371602	0.0398451
1.66667	1.01474	1.00244	0.00798513	0.00422966		-0.341664	-0.138149
2	1.0221	0.999316	0.00735837	0.00392274		0.295119	-0.199927
2.33333	1.01783	1.00133	0.00964514	0.0046755		0.913391	-0.223411
2.66667	1.05312	0.996394	0.00784404	0.00585783		1.04644	-0.306815
3	1.07332	0.99988	0.0100347	0.00638931		1.059	-0.239045
3.33333	1.08534	1.0016	0.0110548	0.00749023		0.474376	0.919237
3.66667	1.09584	1.00183	0.0114469	0.00874141		0.201196	0.565666
4	1.10548	1.0039	0.0132753	0.009411		-0.0511906	1.19564
4.33333	1.0994	1.00147	0.0132308	0.0106747		0.776074	1.31863
4.66667	1.10224	1.00667	0.0141616	0.0108052		0.936498	0.453364
5	0.955342	0.917324	0.0158599	0.0373509		1.86405	0.498553
5.33333	0.892765	0.815952	0.014164	0.0240285		2.03431	0.271912
5.66667	0.893182	0.79675	0.0147283	0.014932		1.61859	0.21353
6	0.882484	0.781427	0.0167481	0.0142502		0.43888	0.386518
6.33333	0.876442	0.77917	0.0178467	0.0143456		0.913725	0.169743
6.66667	0.87748	0.780083	0.0184827	0.0152214		0.957548	0.466439
7	0.885794	0.781812	0.021089	0.0160428		0.645516	0.58778
7.33333	0.880089	0.78473	0.0201287	0.0159437		0.275272	0.473501
7.66667	0.880074	0.784958	0.0225268	0.016993		0.228598	0.660541
8	0.885071	0.786047	0.0251924	0.01755		0.427058	0.0794938
8.33333	0.896261	0.785559	0.0292293	0.0177007		0.339886	0.226648
8.66667	0.910292	0.789954	0.0343426	0.017903		1.8393	-0.052413
9	0.934374	0.788957	0.042755	0.0180428		0.909642	0.212171
9.33333	0.960857	0.793627	0.0501188	0.0185413		0.827529	-0.153977
9.66667	0.989419	0.795846	0.0595291	0.0190518		0.977403	0.424092
10	1.02356	0.799074	0.0693903	0.0198069		1.6354	-0.0363828
10.3333	1.06799	0.795908	0.0814778	0.0202264		1.8393	0.601157
10.6667	1.11351	0.807254	0.0919249	0.0215701		0.909642	-0.281983
11	1.16391	0.821699	0.105298	0.024126		0.827529	-0.148116
11.3333	1.2151	0.839505	0.118461	0.0261142		0.977403	0.278929
11.6667	1.26668	0.852571	0.133842	0.0287158			0.298236
12	1.31363	0.865864	0.146479	0.0305392			0.075489
12.3333	1.34977	0.881432	0.154066	0.0330829			-0.249808
12.6667	1.39249	0.898811	0.159898	0.034731			0.589345
13	1.42673	0.899612	0.160643	0.036013			0.28565
13.3333	1.46561	0.913605	0.161438	0.0381912			-0.406457
13.6667	1.4919	0.925574	0.158639	0.0389315
14	1.52957	0.93883	0.157465	0.0404317
14.3333	1.5477	0.958297	0.157915	0.0422352
14.6667	1.57155	0.974441	0.158861	0.0456867
15	1.58296	1.0002	0.159097	0.047661
15.3333	1.59922	1.01673	0.157688	0.0479109
15.6667	1.5991	1.02507	0.156831	0.0497349
16	1.62136	1.03597	0.157928	0.0489405
16.3333	1.62831	1.04747	0.15822	0.0486127
16.6667	1.64158	1.05958	0.156461	0.0502503
17	1.65725	1.0702	0.155032	0.0494317
17.3333	1.67278	1.08393	0.154005	0.0485718
17.6667	1.69707	1.09233	0.15119	0.0496206
18	1.71963	1.09932	0.14534	0.0488176
18.3333	1.75038	1.10952	0.141048	0.0510316
18.6667	1.78574	1.10853	0.139462	0.0502604
19	1.80642	1.11926	0.134978	0.0514098
19.3333	1.83293	1.12428	0.131437	0.0519152
19.6667	1.85318	1.12709	0.128592	0.0524292
20	1.86361	1.12507	0.12668	0.052363
20.3333	1.87704	1.14101	0.127961	0.053015
20.6667	1.88292	1.13375	0.128347	0.0529478
21	1.88334	1.13398	0.12807	0.0529475
21.3333	1.88745	1.13622	0.126024	0.0543227
21.6667	1.88454	1.13442	0.127393	0.054984
22	1.8907	1.13773	0.127026	0.055551
22.3333	1.89497	1.13853	0.127768	0.0560311
22.6667	1.88707	1.14316	0.125177	0.0561021
23	1.88995	1.15088	0.124765	0.0567417
23.3333	1.88984	1.15029	0.125354	0.0577717
23.6667	1.88585	1.16101	0.12463	0.0582005
24	1.88931	1.16508	0.122557	0.059633
24.3333	1.88283	1.1659	0.122178	0.0602583
24.6667	1.88192	1.16841	0.121922	0.0613735
25	1.88976	1.1711	0.122539	0.0605851
25.3333	1.89477	1.17197	0.121854	0.0628072
25.6667	1.89077	1.1838	0.120981	0.0639479
26	1.89072	1.18245	0.121086	0.0637402
26.3333	1.88545	1.18124	0.121222	0.0640758
26.6667	1.88073	1.1819	0.119923	0.0636896
27	1.88297	1.18337	0.119826	0.0641494
27.3333	1.87176	1.18013	0.118058	0.0650038
27.6667	1.87199	1.19284	0.118191	0.065196
28	1.86921	1.20009	0.117683	0.0656003
28.3333	1.87273	1.2037	0.118298	0.065613
28.6667	1.8756	1.19948	0.120225	0.0659088
29	1.87448	1.20457	0.119695	0.0673344
29.3333	1.86741	1.2083	0.119719	0.068395
29.6667	1.86425	1.21241	0.118844	0.0684318
30	1.87035	1.20732	0.119395	0.0680785
30.3333	1.86784	1.21356	0.118749	0.0682096
30.6667	1.85854	1.21752	0.118442	0.0690761
31	1.8684	1.22645	0.120106	0.0693244
31.3333	1.86963	1.22768	0.1199	0.0705415
31.6667	1.86969	1.23753	0.121463	0.0710726
32	1.87668	1.23965	0.12194	0.0716891
32.3333	1.88337	1.23725	0.121644	0.0718718
32.6667	1.88987	1.23933	0.123292	0.0712924
33	1.90049	1.24706	0.123979	0.0711831
33.3333	1.91179	1.24668	0.125862	0.0709584
33.6667	1.91892	1.24926	0.126567	0.0713053
34	1.93467	1.24983	0.129467	0.0705875
34.3333	1.94044	1.25364	0.130822	0.0703236
34.6667	1.95105	1.2568	0.13233	0.0700477
35	1.96394	1.26274	0.133946	0.0699135

## Sheet: Source data Figure 3-S-1 B,D
Source data for Figure 3-figure supplement 1 B (Left)
GRAM1b
DOPC	100	90	80	70	50	40
Chol	0	10	20	30	50	60
Replicate 1	3.40538	3.87014	4.51951	4.94881	18.5139	27.0717
Replicate 2	2.9556	4.37528	6.28204	8.31939	21.9603	30.7228
Replicate 3	3.58979	3.49315	3.88971	6.38667	20.157	26.1123
Source data for Figure 3-figure supplement 1 B (Right)
GRAM1b
DOPC	95	50	80	70	55
DOPS	5	10	20	50	80
Replicate 1	7.12475	6.0863	6.48354	46.5102	86.7964
Replicate 2	6.13179	4.68281	8.52273	25.0184	91.9413
Replicate 3	12.9588	6.36642	7.23106	35.6444	81.8932
Source data for Figure 3-figure supplement 1 D
GRAM1b
DOPC	95	45	95	45	95	45	95	45	95	45	95	45
Chol	0	50	0	50	0	50	0	50	0	50	0	50
DOPS	5	5	0	0	0	0	0	0	0	0	0	0
PA	0	0	5	5	0	0	0	0	0	0	0	0
PI(4)P	0	0	0	0	5	5	0	0	0	0	0	0
PI(4,5)P2	0	0	0	0	0	0	5	5	0	0	0	0
POPE	0	0	0	0	0	0	0	0	5	5	0	0
SM	0	0	0	0	0	0	0	0	0	0	5	5
Replicate 1	8.78378	39.5221	14.9591	73.5417	14.467	54.2278	24.7889	91.3714	9.80854	9.49312	8.82832	5.77851
Replicate 2	9.92813	43.8336	10.8943	75.1737	15.8449	55.4123	22.6641	94.8851	9.75912	9.05246	10.1875	7.98387
Replicate 3	8.04999	37.8063	11.2636	65.1884	15.4998	56.1117	27.3601	89.6755	4.73349	14.7094	10.7716	6.8921
