# Supplementary material for: Movement of accessible plasma membrane cholesterol by the GRAMD1 lipid transfer protein complex
Source: eLife. 2019 Nov 14;8:e51401. doi: 10.7554/eLife.51401 (PMC6905856; doi:10.7554/eLife.51401)
Supplement: Figure 3—figure supplement 2—source data 1. [file elife-51401-fig3-figsupp2-data1.xlsx]

## Sheet: Source data Figure 3-S-2 A,B
Source data for Figure 3-figure supplement 2 A
GRAM1b
DOPC	100	80	60	50	40	30
DOPS	0	20	20	20	20	20
POPE	0	0	20	30	40	50
Replicate 1	1.8955	8.04423	4.72139	6.15093	8.32258	4.49772
Replicate 2	3.60244	5.26706	5.28835	5.02517	10.8165	5.69151
Replicate 3	1.92841	1.66764	1.0398	4.0912	3.21458	4.84992
Source data for Figure 3-figure supplement 2 B
GRAM1b
DPhyPC	100	80	60	50	40	30	20
DOPS	0	20	20	20	20	20	20
Chol	0	0	20	30	40	50	60
Replicate 1	4.21661	16.0028	69.1855	76.8946	99.9025	99.9198	99.6652
Replicate 2	10.183	13.8828	76.442	91.3892	95.9911	97.2067	96.0153
Replicate 3	9.13096	21.3053	58.6329	94.2473	96.0551	98.5214	99.4011
Source data for Figure 3-figure supplement 2 B
GRAM1b
DOPC	100	80	60	50	40	30	20
DOPS	0	20	20	20	20	20	20
Chol	0	0	20	30	40	50	60
Replicate 1	9.82154	9.00369	26.1424	56.2484	98.8367	90.2594	94.438
Replicate 2	6.07023	8.996	26.4434	55.6064	94.9367	96.4989	98.6476
Replicate 3	14.7335	11.5479	33.4973	60.3898	92.9952	99.596	93.5563
Source data for Figure 3-figure supplement 2 B
GRAM1b
POPC	100	80	60	50	40	30	20
DOPS	0	20	20	20	20	20	20
Chol	0	0	20	30	40	50	60
Replicate 1	7.99066	5.9883	9.77805	15.4367	15.6948	55.1746	90.6348
Replicate 2	11.9293	6.00115	11.5603	14.5698	20.4429	59.4168	99.2715
Replicate 3	10.7429	9.9627	11.1157	17.8775	24.1029	64.901	83.1858
