# Supplementary material for: Movement of accessible plasma membrane cholesterol by the GRAMD1 lipid transfer protein complex
Source: eLife. 2019 Nov 14;8:e51401. doi: 10.7554/eLife.51401 (PMC6905856; doi:10.7554/eLife.51401)
Supplement: Figure 3—source data 1. [file elife-51401-fig3-data1.xlsx]

## Sheet: Source data Figure 3 B
Source data for Figure 3 B
F/F0 (EGFP)
	Average				SEM
Time (min)	EGFP-GRAMD1a	EGFP-GRAMD1b	EGFP-GRAMD1c	EGFP-GRAMD3	EGFP-GRAMD1a	EGFP-GRAMD1b	EGFP-GRAMD1c	EGFP-GRAMD3
0	1.05945	1.0014	1.01384	1.00982	0.00634595	0.00680641	0.0142202	0.00436597
0.333333	1.04086	0.999377	0.996766	1.00636	0.00288284	0.00433535	0.021218	0.00298549
0.666667	1.01548	0.99831	0.980321	1.00299	0.00168257	0.00280896	0.0213631	0.00169224
1	0.990999	0.993374	0.99992	1.00381	0.00201187	0.0018209	0.00431589	0.00240279
1.33333	0.968809	0.990654	1.02561	0.992286	0.00263999	0.00311127	0.0368517	0.00218518
1.66667	0.960876	1.00313	0.99154	0.999246	0.00321514	0.0043295	0.009302	0.00229761
2	0.963528	1.01376	0.992008	0.985492	0.00395646	0.00515444	0.00707716	0.00329158
2.33333	0.975228	1.02354	0.996004	0.977002	0.0037249	0.00486551	0.0163986	0.00340927
2.66667	0.992892	1.02895	1.03076	0.976025	0.00514809	0.00672693	0.0484322	0.00448216
3	1.01061	1.02998	1.00945	0.977031	0.00644599	0.00744784	0.0348702	0.00416446
3.33333	1.0245	1.02852	0.992415	0.97557	0.00731904	0.00826466	0.0230749	0.0042478
3.66667	1.02428	1.02288	0.995698	0.988772	0.00872755	0.00891056	0.0285083	0.00468036
4	1.02092	1.02867	1.00313	0.984823	0.00921808	0.00954617	0.0394345	0.00547689
4.33333	0.993899	1.03382	1.02183	0.988207	0.0106727	0.0100552	0.058674	0.00616629
4.66667	0.969733	1.02794	1.02956	0.994332	0.0106267	0.0118571	0.0655589	0.00670661
5	0.816103	0.937085	0.901529	0.947112	0.0171392	0.0127571	0.027807	0.0075171
5.33333	0.761244	0.545619	0.726134	0.887314	0.012968	0.0694107	0.0980484	0.00872218
5.66667	0.75729	0.698609	0.725758	0.864334	0.0119168	0.070533	0.0766199	0.0091226
6	0.769107	0.852477	0.701071	0.841417	0.0125836	0.020085	0.0886741	0.00854053
6.33333	0.789927	0.867096	0.671684	0.831038	0.0130035	0.0103974	0.107448	0.00862622
6.66667	0.813295	0.874594	0.677661	0.824226	0.0136096	0.0118299	0.104499	0.00883944
7	0.836406	0.864224	0.639965	0.822969	0.0140582	0.0118149	0.135534	0.0093512
7.33333	0.857177	0.856377	0.661892	0.825375	0.0142212	0.0118092	0.115847	0.00989634
7.66667	0.860448	0.850278	0.665922	0.824991	0.0150071	0.0117487	0.114649	0.0106976
8	0.853476	0.846602	0.677152	0.824857	0.0152007	0.0115018	0.0986203	0.0105196
8.33333	0.845918	0.835932	0.671156	0.828572	0.0154717	0.0117458	0.107546	0.011213
8.66667	0.829694	0.831578	0.670117	0.827126	0.0154682	0.0115568	0.110247	0.0121246
9	0.815051	0.820441	0.649147	0.828082	0.0154578	0.0123539	0.137984	0.0131736
9.33333	0.799222	0.825713	0.65049	0.838723	0.0146501	0.0129521	0.13473	0.0133733
9.66667	0.796018	0.834511	0.675122	0.847693	0.0154727	0.0157497	0.113932	0.0158006
10	0.790688	0.827259	0.673944	0.856489	0.0158253	0.0181982	0.117659	0.0175393
10.3333	0.787874	0.827504	0.67443	0.877624	0.0165479	0.0221282	0.123016	0.020138
10.6667	0.805947	0.850572	0.697163	0.903192	0.0173665	0.0285558	0.104952	0.0252743
11	0.815809	0.882301	0.705977	0.934078	0.0183595	0.0378465	0.107814	0.0318184
11.3333	0.82858	0.921548	0.742757	0.966609	0.0193696	0.0474965	0.0823301	0.0390346
11.6667	0.849741	0.982098	0.758731	1.01326	0.0206667	0.0595533	0.074763	0.0503881
12	0.873348	1.05346	0.779644	1.06809	0.0223559	0.0720115	0.0683522	0.0650044
12.3333	0.907302	1.13278	0.827117	1.1379	0.026685	0.0846597	0.0395664	0.0791746
12.6667	0.931412	1.20809	0.828481	1.20978	0.0294434	0.0965248	0.0590708	0.0940115
13	0.959937	1.28968	0.886222	1.29219	0.0337365	0.108422	0.0340079	0.110035
13.3333	0.982089	1.36875	0.976738	1.36471	0.0385243	0.117378	0.0583757	0.12279
13.6667	1.012	1.45366	1.04838	1.4427	0.0456933	0.129626	0.0996883	0.135328
14	1.03474	1.53149	1.10594	1.52402	0.052164	0.136673	0.135381	0.14837
14.3333	1.06299	1.61622	1.16597	1.61013	0.0591876	0.146715	0.172803	0.162153
14.6667	1.08641	1.69525	1.2349	1.69947	0.0656913	0.154247	0.208429	0.173333
15	1.10562	1.77511	1.29088	1.78449	0.0715128	0.160778	0.241295	0.182912
15.3333	1.12734	1.86782	1.33139	1.871	0.0772589	0.170701	0.259298	0.193568
15.6667	1.16046	1.95236	1.39343	1.95869	0.0823347	0.179698	0.303892	0.201384
16	1.19449	2.02902	1.42669	2.04936	0.0889957	0.186416	0.307265	0.209515
16.3333	1.24263	2.09126	1.45687	2.14185	0.0966856	0.191241	0.315184	0.218746
16.6667	1.29756	2.14858	1.4781	2.22362	0.104803	0.196462	0.317942	0.225906
17	1.34965	2.17944	1.49453	2.30456	0.110696	0.200558	0.311601	0.234108
17.3333	1.40598	2.2008	1.51752	2.39179	0.118103	0.202741	0.327814	0.242196
17.6667	1.46751	2.23666	1.51073	2.49616	0.126461	0.208378	0.318368	0.253558
18	1.53852	2.25098	1.52488	2.6063	0.13557	0.210838	0.322104	0.265155
18.3333	1.6066	2.27643	1.51829	2.71371	0.146007	0.214306	0.312492	0.277955
18.6667	1.69064	2.29738	1.5245	2.78846	0.153722	0.217676	0.310838	0.284913
19	1.7563	2.30294	1.53789	2.86543	0.161752	0.217972	0.315629	0.293176
19.3333	1.81176	2.31878	1.54753	2.92207	0.168281	0.220716	0.322119	0.297572
19.6667	1.84483	2.31606	1.51497	2.92592	0.172691	0.221559	0.287374	0.298288
20	1.87066	2.31606	1.5446	2.96358	0.176589	0.221214	0.315635	0.299232
20.3333	1.89836	2.33306	1.57649	2.97977	0.180991	0.225089	0.346682	0.300232
20.6667	1.90958	2.33577	1.5449	2.97883	0.180389	0.226909	0.312674	0.297211
21	1.91719	2.32756	1.54465	2.98646	0.179445	0.226	0.311076	0.299226
21.3333	1.92875	2.32667	1.53809	2.98007	0.179598	0.226084	0.296922	0.296413
21.6667	1.91053	2.31533	1.54832	2.98039	0.178924	0.225377	0.299564	0.294134
22	1.90102	2.30587	1.54634	2.97755	0.177709	0.224921	0.297181	0.294264
22.3333	1.91597	2.30665	1.5317	2.98089	0.181318	0.22608	0.2779	0.291908
22.6667	1.91722	2.29554	1.51214	2.95481	0.179848	0.224346	0.263717	0.287882
23	1.94334	2.29605	1.53918	2.94395	0.182786	0.226037	0.280165	0.284111
23.3333	1.96705	2.28353	1.57527	2.92979	0.186242	0.223963	0.308975	0.281703
23.6667	1.99389	2.28298	1.56554	2.90317	0.190148	0.224848	0.29986	0.278511
24	2.0354	2.28019	1.57956	2.89539	0.194202	0.22663	0.304066	0.277166
24.3333	2.07599	2.26721	1.57597	2.88106	0.198973	0.223151	0.299602	0.274231
24.6667	2.12854	2.26155	1.5542	2.857	0.203666	0.223922	0.2695	0.268363
25	2.17084	2.255	1.56571	2.83963	0.209389	0.225163	0.279718	0.2639
25.3333	2.20848	2.24874	1.58642	2.8379	0.214387	0.223645	0.288913	0.26056
25.6667	2.27332	2.24267	1.55687	2.80449	0.220632	0.223319	0.264204	0.256381
26	2.32128	2.23641	1.56935	2.78341	0.226296	0.221115	0.276671	0.250177
26.3333	2.36118	2.22239	1.61147	2.77753	0.230013	0.219691	0.312978	0.251756
26.6667	2.40868	2.20757	1.62239	2.77651	0.235296	0.217153	0.311217	0.248019
27	2.44593	2.20334	1.61237	2.75471	0.238275	0.21734	0.29511	0.248364
27.3333	2.4658	2.19703	1.63591	2.74256	0.239929	0.215461	0.312446	0.245716
27.6667	2.47039	2.18203	1.6557	2.73687	0.239079	0.213638	0.321825	0.242954
28	2.47519	2.16728	1.62453	2.73025	0.23858	0.210824	0.29939	0.2424
28.3333	2.4609	2.15624	1.63562	2.71306	0.234984	0.208468	0.298868	0.238019
28.6667	2.44579	2.15579	1.66696	2.70046	0.234084	0.208738	0.322969	0.235539
29	2.43983	2.14565	1.6511	2.70135	0.232989	0.208451	0.302303	0.233153
29.3333	2.41852	2.14394	1.6704	2.69547	0.231863	0.205663	0.314842	0.232999
29.6667	2.40651	2.13826	1.6951	2.69506	0.231037	0.20554	0.330976	0.230716
30	2.37785	2.11569	1.7031	2.69422	0.226944	0.202155	0.338385	0.231022
30.3333	2.34657	2.09938	1.70697	2.68275	0.222053	0.199706	0.338864	0.229858
30.6667	2.33028	2.09842	1.7143	2.67897	0.219535	0.199057	0.345023	0.228214
31	2.30098	2.09555	1.72551	2.67416	0.218043	0.199203	0.350996	0.225057
31.3333	2.28174	2.09317	1.75309	2.66336	0.215028	0.195677	0.372303	0.225239
31.6667	2.28301	2.10704	1.74255	2.66451	0.215607	0.197452	0.357398	0.222176
32	2.2822	2.08852	1.7529	2.67135	0.213243	0.196508	0.367813	0.220067
32.3333	2.28898	2.08866	1.7356	2.68729	0.215795	0.194377	0.34645	0.217035
32.6667	2.3038	2.08176	1.71874	2.72525	0.216401	0.193218	0.333084	0.21475
33	2.32902	2.07184	1.71508	2.7203	0.218694	0.192356	0.334554	0.213022
33.3333	2.34655	2.07538	1.70654	2.67641	0.219267	0.192784	0.323639	0.222935
33.6667	2.37767	2.08591	1.71671	2.66914	0.222517	0.191541	0.331553	0.220387
34	2.40058	2.0842	1.72262	2.68664	0.222815	0.190179	0.335719	0.208693
34.3333	2.40938	2.08231	1.70604	2.73995	0.223039	0.186859	0.324307	0.207595
34.6667	2.41081	2.08932	1.71774	2.70959	0.224629	0.186584	0.335923	0.216261
35	2.41845	2.09669	1.71703	2.64335	0.224429	0.185137	0.335272	0.217985

## Sheet: Source data Figure 3 C,D,E,F
Source data for Figure 3 C
GRAM1b
DOPC	100	50	80	70	55	30
DOPS	0	0	20	20	20	20
Chol	0	50	0	10	25	50
Replicate 1	8.5	18.5	0.1	0	14.7	69.7
Replicate 2	11.3	15.8	0.8	0.87	13.7	66.3
Replicate 3	1.9	7.6	0.34	2.5	12	93
Source data for Figure 3 D
GRAM1a
DOPC	100	50	80	70	55	30
DOPS	0	0	20	20	20	20
Chol	0	50	0	10	25	50
Replicate 1	8.18849	12.8464	14.7999	11.7937	20.8955	35.1263
Replicate 2	15.2447	17.6829	10.512	14.7581	14.0333	41.4443
Replicate 3	19.9321	14.1329	8.95571	11.3693	18.926	34.0367
Source data for Figure 3 E
GRAM1b
DOPC	80	55	30	20	5
DOPS	20	20	20	20	20
Chol	0	25	50	50	50
SM	0	0	0	10	25
Replicate 1	9.281	3.86427	74.2475	70.2269	51.0351
Replicate 2	4.4097	15.0966	73.6288	70.3491	46.1176
Replicate 3	3.71795	17.9017	77.0731	66.4446	41.5311
Source data for Figure 3 F
GRAM1a
DOPC	80	55	30	20	5
DOPS	20	20	20	20	20
Chol	0	25	50	50	50
SM	0	0	0	10	25
Replicate 1	4.64493	8.2463	37.4705	26.6263	23.4962
Replicate 2	2.09152	7.81506	30.4601	26.6176	16.6799
Replicate 3	2.17919	7.61335	40.511	25.7114	13.8298

## Sheet: Source data Figure 3 G
Source data for Figure 3 G
F/F0 (EGFP) (Left)						Dot Plot (Right)
	Average		SEM			Individual Values
Time (min)	EGFP-GRAMD1b	EGFP-GRAMD1b DGRAM	EGFP-GRAMD1b	EGFP-GRAMD1b DGRAM		EGFP-GRAMD1b	EGFP-GRAMD1b DGRAM
0	0.995337	1.04561	0.00444616	0.00833262		0.604308	0.67805
0.333333	0.991184	1.04181	0.00365082	0.00729439		0.820221	0.621049
0.666667	0.992711	1.03493	0.00324109	0.00648904		0.617702	0.373296
1	0.991638	1.03511	0.00325869	0.00591455		0.321129	0.082223
1.33333	0.993114	1.02793	0.00277717	0.00531786		0.87964	0.05312
1.66667	0.998716	1.02602	0.00240176	0.00468303		0.608441	-0.000775
2	0.995025	1.01859	0.00227358	0.00374554		0.351872	0.288005
2.33333	0.997562	1.01696	0.00223356	0.00287487		0.497359	0.330243
2.66667	0.999392	1.01024	0.0017826	0.00192051		0.809413	0.223291
3	0.999243	1.00782	0.00162813	0.00182731		0.750756	0.28437
3.33333	1.0048	1.00029	0.0027912	0.0016436		0.456915	0.510936
3.66667	1.00191	0.992612	0.00220702	0.00263675		0.163258	0.495836
4	1.01548	0.993539	0.00300408	0.00292294		0.842384	0.403212
4.33333	1.01438	0.988506	0.00190693	0.0042106		0.402974	0.344095
4.66667	0.973498	0.945427	0.00459222	0.00957502		0.551169	0.307892
5	0.969849	0.939434	0.00424194	0.00958912		0.441949	0.789556
5.33333	0.976513	0.936844	0.00446115	0.0095286		0.428229	0.670259
5.66667	0.9876	0.945174	0.00467705	0.00988066		0.667647	0.381769
6	0.996567	0.947528	0.00538756	0.00998922		-0.032405	-0.031543
6.33333	0.992387	0.948696	0.00526447	0.0107986		0.467008	0.139837
6.66667	0.995701	0.948158	0.00543829	0.0113397		0.254998	0.10512
7	1.00042	0.946476	0.00508134	0.0109557		0.320763	0.169946
7.33333	1.0051	0.940617	0.00483064	0.0111848		0.560242	0.018786
7.66667	1.01048	0.941727	0.00499105	0.0108186		0.498339	0.070532
8	1.01856	0.944524	0.00551556	0.0114109		0.261545	-0.073676
8.33333	1.0188	0.945588	0.00548478	0.0111359		0.274964	0.049016
8.66667	1.02209	0.948789	0.00525669	0.0116324		0.397601	-0.089255
9	1.03549	0.945722	0.00591661	0.0117376		0.405614	-0.133766
9.33333	1.04021	0.946948	0.00592242	0.0121333		0.37154	-0.119533
9.66667	1.04349	0.952491	0.00582033	0.0127514		0.333209	-0.066635
10	1.04611	0.949508	0.00615453	0.0131478		0.366296	-0.112696
10.3333	1.04945	0.950237	0.00641694	0.0134742		0.517424	-0.050866
10.6667	1.04878	0.951793	0.00685951	0.0136251		0.535743	-0.01845
11	1.05848	0.952968	0.00655385	0.0140956		0.494645	0.363755
11.3333	1.06082	0.95379	0.0070237	0.0147553		0.583418	0.164548
11.6667	1.0683	0.955599	0.00719835	0.0147796		0.609057	0.174028
12	1.06867	0.954837	0.00782564	0.0144843		0.190277	-0.088994
12.3333	1.07735	0.957151	0.00783413	0.0145081		0.253457	0.055186
12.6667	1.08525	0.958273	0.00808504	0.0151329		0.610731	-0.021427
13	1.08731	0.957177	0.00826135	0.0150221		0.422006	-0.051249
13.3333	1.09178	0.963565	0.00842218	0.0149741		0.321777	0.295979
13.6667	1.0949	0.959322	0.00866541	0.0153728		0.337525	0.339897
14	1.10137	0.958884	0.00866852	0.0152591		0.494237	0.106317
14.3333	1.10756	0.956705	0.00949518	0.016007		0.914382	0.032142
14.6667	1.11378	0.967075	0.00927839	0.0165136		0.408484	-0.06306
15	1.11532	0.959518	0.00975682	0.0171035		0.76375	0.167873
15.3333	1.1237	0.966968	0.0100106	0.0164729		0.718483	-0.062563
15.6667	1.12495	0.967357	0.0102902	0.0167594		0.471473	0.083797
16	1.13241	0.967547	0.0100497	0.0165172		0.632411	0.26388
16.3333	1.13677	0.977486	0.0103568	0.0166827		0.430558	0.078851
16.6667	1.13383	0.972729	0.0107894	0.0173219		0.357603	0.042296
17	1.15873	0.981099	0.0120632	0.0169175		0.467638	0.041041
17.3333	1.14817	0.979565	0.0114388	0.017293		0.393249	0.525421
17.6667	1.1489	0.985709	0.0110648	0.0174116		1.23202	0.564239
18	1.15363	0.987245	0.0110831	0.0173482		0.735647	0.471406
18.3333	1.15755	0.991214	0.0115751	0.01723		0.537747	0.729577
18.6667	1.16164	0.991617	0.0122724	0.0174519		0.902076	0.424336
19	1.16802	0.9944	0.0126631	0.0176917		0.568474	0.034186
19.3333	1.17479	0.998686	0.012477	0.0181748		0.490252	0.283766
19.6667	1.18195	0.997073	0.0127011	0.0185563		0.598444	0.089921
20	1.18587	0.998043	0.0125818	0.0185094		1.05764	-0.038222
20.3333	1.19412	1.00023	0.0129958	0.0188144		1.59991	0.69037
20.6667	1.20315	1.00008	0.0132636	0.0184908		0.900204	0.175844
21	1.20517	1.00649	0.0132022	0.0181908		0.529352	0.570565
21.3333	1.21214	1.00367	0.0141834	0.0190667		0.757044
21.6667	1.21356	1.00935	0.0140413	0.0189156		0.227323
22	1.22294	1.01221	0.014653	0.0194005		0.40143
22.3333	1.22431	1.00687	0.0144648	0.0197287		0.449858
22.6667	1.22993	1.01021	0.014765	0.0194085		1.3131
23	1.22965	1.01291	0.0146555	0.0197111		1.54529
23.3333	1.23892	1.01609	0.0146715	0.0195296		1.13377
23.6667	1.24166	1.01285	0.0149994	0.0195875		1.39237
24	1.24392	1.01368	0.0147265	0.0193376
24.3333	1.24618	1.01641	0.0156498	0.0197
24.6667	1.25121	1.02452	0.0158165	0.0195965
25	1.25945	1.02509	0.0159682	0.0196221
25.3333	1.25896	1.03144	0.0165878	0.0193537
25.6667	1.26864	1.03152	0.0164866	0.0202426
26	1.28069	1.03564	0.0169596	0.019952
26.3333	1.27678	1.03947	0.016927	0.0200539
26.6667	1.28784	1.04012	0.0172151	0.020205
27	1.28626	1.03642	0.0170731	0.0201723
27.3333	1.29009	1.04366	0.0166232	0.0205143
27.6667	1.2966	1.04819	0.0166354	0.0201256
28	1.30206	1.04728	0.0174293	0.0208024
28.3333	1.30954	1.04606	0.0176972	0.0205619
28.6667	1.30749	1.04794	0.0175174	0.0208095
29	1.31429	1.05135	0.0181065	0.0210832
29.3333	1.31849	1.05981	0.0188483	0.0209174
29.6667	1.32308	1.05723	0.0185834	0.0209181
30	1.32332	1.06067	0.0186682	0.0205475
30.3333	1.32847	1.06038	0.0188059	0.0209725
30.6667	1.32922	1.05711	0.0187952	0.0214411
31	1.33321	1.05744	0.0193843	0.021102
31.3333	1.33545	1.05669	0.0192001	0.0214378
31.6667	1.33481	1.06195	0.0196693	0.0211138
32	1.33834	1.06323	0.0202301	0.0215283
32.3333	1.34534	1.0706	0.0206516	0.0214025
32.6667	1.34794	1.06827	0.0204074	0.0215447
33	1.35309	1.0668	0.0204585	0.0216646
33.3333	1.3509	1.06221	0.0198707	0.0219187
33.6667	1.35585	1.07071	0.0198069	0.0216251
34	1.35918	1.06811	0.0198478	0.0220876
34.3333	1.3601	1.07284	0.0200128	0.0224
34.6667	1.36472	1.07625	0.0202426	0.0219467
35	1.36949	1.07809	0.0199147	0.0225437
35.3333	1.37498	1.07898	0.0206111	0.0221975
35.6667	1.38418	1.07604	0.0206763	0.0222863
36	1.38843	1.07728	0.0206938	0.0225143
36.3333	1.39557	1.07911	0.0206676	0.0223902
36.6667	1.39449	1.08515	0.0207816	0.0218419
37	1.39889	1.08537	0.0211705	0.0216799
37.3333	1.3978	1.09004	0.0211312	0.0220029
37.6667	1.40048	1.0904	0.021093	0.0220957
38	1.40655	1.08824	0.0212877	0.0217688
38.3333	1.41857	1.09135	0.0224869	0.02267
38.6667	1.42302	1.08996	0.0228909	0.0218986
39	1.41458	1.09493	0.0227589	0.0217255
39.3333	1.41902	1.09594	0.0229528	0.0218385
39.6667	1.42126	1.09813	0.0231757	0.0217614
40	1.42668	1.09779	0.0238218	0.0227934
40.3333	1.43218	1.10157	0.0234928	0.0227334
40.6667	1.42632	1.09895	0.0239591	0.0232685
41	1.43716	1.10091	0.0242362	0.0230928
41.3333	1.43553	1.10212	0.0238132	0.0229067
41.6667	1.43688	1.10263	0.024134	0.023223
42	1.43885	1.10371	0.0244446	0.0232754
42.3333	1.44274	1.10352	0.0243491	0.0237292
42.6667	1.44541	1.10066	0.0249382	0.0236551
43	1.44766	1.1053	0.0242468	0.0242347
43.3333	1.45409	1.10024	0.024443	0.0241493
43.6667	1.45274	1.105	0.0251244	0.0242551
44	1.45277	1.10534	0.0254618	0.0244635
44.3333	1.44769	1.10804	0.0255011	0.0248102
44.6667	1.45621	1.11054	0.0258002	0.0247154
45	1.4616	1.11339	0.0257756	0.0249573
45.3333	1.4649	1.11288	0.0256086	0.0253339
45.6667	1.46494	1.11612	0.0256458	0.0254277
46	1.46792	1.11988	0.0255741	0.0253987
46.3333	1.46729	1.12045	0.0259689	0.0255154
46.6667	1.46764	1.12019	0.0263108	0.0257277
47	1.46948	1.12066	0.0274233	0.0255237
47.3333	1.47563	1.11833	0.0268515	0.0258078
47.6667	1.47382	1.11844	0.0267027	0.0263338
48	1.47008	1.11883	0.0265224	0.026288
48.3333	1.47748	1.12615	0.0271599	0.026516
48.6667	1.48152	1.12405	0.0272974	0.0268443
49	1.48437	1.12762	0.0273842	0.0273708
49.3333	1.48584	1.13056	0.0277712	0.0266526
49.6667	1.48675	1.12627	0.0280348	0.0265231
50	1.48791	1.13357	0.0285495	0.0269216
50.3333	1.49709	1.13641	0.0287138	0.0273032
50.6667	1.50053	1.13968	0.0289103	0.0265916
51	1.50711	1.14047	0.028676	0.0266754
51.3333	1.50534	1.14137	0.0287439	0.0267911
51.6667	1.5023	1.14079	0.0284077	0.0270934
52	1.50138	1.14187	0.0282923	0.0270174
52.3333	1.50467	1.1437	0.0290571	0.0269488
52.6667	1.50883	1.14474	0.0294971	0.0270801
53	1.51181	1.14877	0.0295751	0.0271858
53.3333	1.51144	1.14331	0.0290035	0.0270008
53.6667	1.51467	1.1428	0.0297737	0.0274886
54	1.52063	1.14951	0.0303087	0.0278817
54.3333	1.52566	1.1522	0.0307234	0.0269471
54.6667	1.52621	1.15151	0.0308738	0.0274209
55	1.52972	1.15706	0.0311148	0.0274403
55.3333	1.53507	1.15846	0.0318055	0.0273349
55.6667	1.53291	1.15649	0.0327232	0.0275485
56	1.53165	1.16414	0.0322083	0.0275382
56.3333	1.53021	1.16446	0.0329068	0.0281176
56.6667	1.52911	1.16958	0.0322085	0.0285435
57	1.53834	1.17601	0.0324804	0.0284203
57.3333	1.53095	1.17283	0.0329235	0.0290809
57.6667	1.53561	1.17667	0.0332543	0.0290164
58	1.54267	1.1783	0.0338469	0.0289457
58.3333	1.53636	1.18317	0.0333971	0.0289948
58.6667	1.54137	1.18298	0.033849	0.0290879
59	1.53954	1.18335	0.0342556	0.0297462
59.3333	1.54713	1.18445	0.033787	0.0288843
59.6667	1.54641	1.18517	0.0347451	0.0291861
60	1.54512	1.18454	0.0344407	0.0297179
60.3333	1.55247	1.18911	0.0347132	0.029616
60.6667	1.54836	1.18765	0.0342837	0.0296461
61	1.55257	1.18806	0.0347821	0.0300979
61.3333	1.54882	1.18718	0.034618	0.0302854
61.6667	1.54795	1.18794	0.0350378	0.0306557
62	1.55284	1.19224	0.0351757	0.0302171
62.3333	1.55885	1.18908	0.035404	0.030072
62.6667	1.55941	1.19207	0.035688	0.0302194
63	1.55543	1.19522	0.0360339	0.0303537
63.3333	1.56743	1.19427	0.0362997	0.0303051
63.6667	1.56689	1.2013	0.036318	0.0302202
64	1.57535	1.20573	0.0366514	0.0302105
64.3333	1.58166	1.19962	0.0368246	0.0307107
64.6667	1.58454	1.20358	0.0368127	0.0304159
65	1.58327	1.20526	0.0367706	0.0306602

## Sheet: Source data Figure 3 H
Source data for Figure 3 H
F/F0 (EGFP) (Left)								Dot Plot (Right)
	Average			SEM				Individual Values
Time (min)	EGFP-GRAM1a	EGFP-GRAM1b	EGFP-GRAM1c	EGFP-GRAM1a	EGFP-GRAM1b	EGFP-GRAM1c		EGFP-GRAM1a	EGFP-GRAM1b	EGFP-GRAM1c
0	0.982558	0.98154	0.987576	0.00167389	0.00184898	0.00279342		0.466194	0.195467	0.510384
0.333333	0.982088	0.982903	0.990109	0.00166019	0.0017143	0.00219564		0.465142	0.233918	0.461566
0.666667	0.985255	0.984441	0.991457	0.00154188	0.00149983	0.00276315		0.505291	0.326644	0.053809
1	0.985649	0.986045	0.991607	0.00154956	0.00123464	0.00244355		0.460172	0.435358	0.069788
1.33333	0.984468	0.988161	0.999666	0.00203649	0.00113367	0.00214842		0.420204	0.233138	0.281582
1.66667	0.985382	0.992498	0.996113	0.00151183	0.000807118	0.00146164		0.73196	0.587835	0.38582
2	0.990864	0.99562	0.996119	0.00133515	0.000714635	0.00200487		0.474723	0.634791	0.543451
2.33333	0.994382	0.995202	1.001	0.000909294	0.000922474	0.00151035		0.462957	0.365998	0.557398
2.66667	1.00115	0.996444	0.999519	0.00113771	0.000741598	0.00135451		0.6946	0.369125	0.406807
3	1.00712	0.99974	1.0025	0.00148616	0.000468105	0.00185895		0.80872	0.34159	0.697363
3.33333	1.00876	0.998311	0.991485	0.000928867	0.000910354	0.00201322		0.257059	0.289671	0.803779
3.66667	1.0098	1.00114	1.00889	0.000701357	0.000736946	0.00113536		0.365238	0.310298	0.637701
4	1.00811	1.00576	1.00487	0.00149238	0.000653773	0.00126303		0.534663	0.722064	0.511859
4.33333	1.01149	1.0103	0.998157	0.00128818	0.00104144	0.00227299		0.524849	0.515639	0.491098
4.66667	0.982932	1.00499	1.00135	0.00353701	0.00195385	0.00335534		0.561363	0.521229	0.540558
5	0.976147	0.987235	0.986076	0.00312792	0.00380775	0.00330181		0.487839	0.319454	0.51008
5.33333	0.989846	0.976329	0.991041	0.00325813	0.00287257	0.00314455		0.487575	0.395448	0.918645
5.66667	0.991742	0.97228	0.991406	0.00344121	0.00262455	0.00277848		0.403674	0.159637	0.726652
6	0.987488	0.9736	0.989429	0.00391938	0.00258498	0.00412671		0.493922	0.35826	0.609077
6.33333	0.987429	0.974046	0.988999	0.00348796	0.00252731	0.00310137		0.289664	0.356976	0.676612
6.66667	0.988789	0.974665	0.988625	0.0037964	0.00255128	0.00318217		0.351343	0.344743	0.530195
7	0.983794	0.977548	0.986623	0.00410895	0.0028525	0.00332813		0.297502	0.350536	0.553149
7.33333	0.980486	0.979481	0.983749	0.00392411	0.00304135	0.00345816		0.30757	0.525691	0.404684
7.66667	0.982277	0.977069	0.985885	0.00388466	0.00309183	0.00346547		0.490042	0.409774	0.132163
8	0.980628	0.97878	0.994599	0.00394396	0.00391865	0.00243653		0.233843	0.477728	0.133355
8.33333	0.981608	0.978335	0.99005	0.00409169	0.00429779	0.00350009		0.152548	0.371785	0.332501
8.66667	0.983664	0.983689	0.99494	0.00426836	0.00443702	0.0032208		0.318129	0.434874	0.246943
9	0.980372	0.983864	0.995271	0.00471683	0.00460355	0.00370944		0.194292	0.54192	0.243232
9.33333	0.985254	0.989122	0.995406	0.00455015	0.00445795	0.0033188		0.566132	0.349752	0.112941
9.66667	0.986927	0.993255	0.999329	0.00450929	0.00511376	0.00370644		0.461964	0.393461	0.125757
10	0.989813	0.998082	1.00833	0.00483472	0.00616342	0.00371918		0.415492	0.464606	0.115061
10.3333	0.991845	1.00695	1.00716	0.00469687	0.0084415	0.00376284		0.470547	0.705193	0.687117
10.6667	1.00028	1.01626	1.01008	0.00488815	0.0106228	0.00435072		0.738669	0.762172	1.19439
11	1.0038	1.02714	1.00926	0.00544017	0.0129824	0.00447137		0.17362	0.774824	0.763578
11.3333	1.00683	1.03823	1.01668	0.00604212	0.0149174	0.00441984		0.198494	0.711275	0.759458
11.6667	1.01425	1.04761	1.01933	0.00667269	0.0165424	0.00466401		0.318688	0.3759	0.445094
12	1.0162	1.05963	1.02328	0.00647941	0.0184168	0.00479925		0.259092	0.481165	0.647939
12.3333	1.02011	1.07109	1.02607	0.00680189	0.0196412	0.00527889		0.26395	0.557131	0.706303
12.6667	1.02194	1.07856	1.03003	0.0078595	0.0210575	0.00572409		0.149411	0.659494	0.742919
13	1.0317	1.08576	1.03815	0.00845227	0.0223533	0.00533865		0.169381	0.701982	0.799287
13.3333	1.03421	1.09689	1.03657	0.00849084	0.0236399	0.00607374		0.236482	0.417676	0.649771
13.6667	1.03621	1.10696	1.03969	0.00860153	0.025084	0.00638673		0.93493	0.400074	0.724961
14	1.03916	1.11066	1.04749	0.00878341	0.0259044	0.00615515		0.548703	0.439025	0.826287
14.3333	1.04207	1.12228	1.04951	0.00879597	0.026962	0.00674937		0.662241	0.81202	0.373396
14.6667	1.04328	1.13025	1.04865	0.00913034	0.0276411	0.00716613		0.76656	0.825473	0.313127
15	1.04929	1.1344	1.04999	0.00894068	0.0281907	0.00654839		0.274997	0.248969	0.281297
15.3333	1.04727	1.14209	1.05616	0.00929933	0.0287953	0.00674117		0.139804	0.500006	0.325606
15.6667	1.04801	1.15345	1.05778	0.0093547	0.0293934	0.00695414		0.247249	0.265312	0.291673
16	1.05417	1.15957	1.05446	0.00979374	0.0291896	0.00746374			0.467417	0.259399
16.3333	1.05438	1.16545	1.05678	0.00990066	0.0296557	0.00767157			0.262583	0.761765
16.6667	1.06022	1.1766	1.06955	0.00960952	0.0304997	0.00787509				0.262717
17	1.06188	1.18096	1.0738	0.0100067	0.0306001	0.0074787				0.585487
17.3333	1.06195	1.18576	1.0725	0.00977495	0.0308521	0.00776284				0.616504
17.6667	1.0647	1.19375	1.07339	0.0093521	0.0308182	0.00844361				0.691765
18	1.06694	1.20183	1.07981	0.0100021	0.0313359	0.00866968				0.274571
18.3333	1.06687	1.20374	1.07766	0.00986881	0.030978	0.00803287				0.752052
18.6667	1.06813	1.20652	1.0796	0.00985681	0.0308835	0.00895518				0.549571
19	1.07442	1.20537	1.09014	0.0100041	0.0306695	0.00907935				0.5787
19.3333	1.07401	1.2125	1.08927	0.00980009	0.030894	0.00956672
19.6667	1.08168	1.2212	1.09159	0.00994659	0.0311403	0.00922968
20	1.08124	1.22512	1.09066	0.00992242	0.0312168	0.00996486
20.3333	1.08258	1.23038	1.0919	0.00966585	0.0315953	0.00985228
20.6667	1.08424	1.22915	1.10026	0.0102369	0.0309556	0.0105977
21	1.08587	1.23009	1.10787	0.0100412	0.0306626	0.00982276
21.3333	1.08657	1.24121	1.10684	0.0104798	0.0310618	0.0101993
21.6667	1.08913	1.23924	1.11667	0.0106381	0.0304032	0.0107038
22	1.09168	1.24125	1.11146	0.0102027	0.0302455	0.0109983
22.3333	1.0968	1.24462	1.11854	0.0109944	0.0304844	0.0108802
22.6667	1.09477	1.25009	1.12519	0.0107255	0.0305726	0.0109429
23	1.10012	1.25294	1.12647	0.0111973	0.0306245	0.0109849
23.3333	1.10593	1.2588	1.13412	0.0110282	0.0304723	0.0106511
23.6667	1.1066	1.26147	1.13855	0.0110517	0.030797	0.0112758
24	1.10736	1.26202	1.14235	0.0115858	0.0308131	0.0108926
24.3333	1.11039	1.26207	1.14498	0.0116496	0.0309593	0.0124807
24.6667	1.11071	1.26511	1.14735	0.0117458	0.0306707	0.0117659
25	1.1145	1.27019	1.14742	0.0112173	0.0309158	0.0124316
25.3333	1.11889	1.27592	1.14782	0.0115548	0.0312729	0.0120744
25.6667	1.11745	1.27969	1.15268	0.0118595	0.0311881	0.0126412
26	1.1246	1.2846	1.15511	0.0118792	0.0313897	0.0125842
26.3333	1.12778	1.28456	1.15228	0.0115082	0.0313651	0.0129812
26.6667	1.13485	1.2898	1.16044	0.0115632	0.0314593	0.0133208
27	1.13967	1.29523	1.15819	0.011545	0.031628	0.0130077
27.3333	1.13704	1.29542	1.16784	0.0115264	0.0316731	0.0131672
27.6667	1.143	1.30012	1.17008	0.0116219	0.0320154	0.0139569
28	1.14165	1.30106	1.17417	0.0113971	0.0320211	0.0134147
28.3333	1.1425	1.30199	1.17662	0.0116282	0.0318399	0.0135413
28.6667	1.14159	1.30344	1.17798	0.0113214	0.0318502	0.0141417
29	1.14631	1.30557	1.18652	0.0121649	0.0320044	0.0143005
29.3333	1.15178	1.30639	1.18746	0.0115936	0.0318806	0.0146129
29.6667	1.15155	1.30679	1.18388	0.0117469	0.0318981	0.0148051
30	1.15547	1.30499	1.19156	0.0120216	0.0320061	0.014297
30.3333	1.15767	1.30731	1.19364	0.0121269	0.0321534	0.0150391
30.6667	1.16301	1.3103	1.20087	0.0120576	0.0323328	0.0151393
31	1.17134	1.31063	1.2036	0.0120068	0.0325211	0.0149356
31.3333	1.17166	1.31356	1.20204	0.0116157	0.0326139	0.015467
31.6667	1.17226	1.31502	1.2064	0.0120916	0.0324894	0.015445
32	1.17781	1.31652	1.2125	0.0118827	0.0324801	0.0158586
32.3333	1.17905	1.31988	1.21389	0.0123339	0.0326969	0.0165252
32.6667	1.18031	1.32174	1.21243	0.0124662	0.032357	0.0160806
33	1.17759	1.32627	1.21695	0.012207	0.032538	0.0161141
33.3333	1.17527	1.32939	1.21722	0.0125878	0.0325874	0.016929
33.6667	1.18379	1.33395	1.22034	0.0123923	0.0330503	0.0168709
34	1.18666	1.33891	1.23055	0.012473	0.0328815	0.0166431
34.3333	1.18652	1.34307	1.2346	0.0122314	0.0331621	0.0168888
34.6667	1.19585	1.34631	1.23239	0.0122829	0.0328903	0.0175943
35	1.19984	1.34749	1.23948	0.0125089	0.0333343	0.0172229
35.3333	1.20648	1.35079	1.24396	0.0128588	0.0334111	0.0175098
35.6667	1.21315	1.35642	1.24718	0.0133145	0.0329139	0.0174271
36	1.21444	1.36578	1.24964	0.0135135	0.033184	0.0178579
36.3333	1.21024	1.37153	1.25253	0.0131203	0.0331516	0.0182134
36.6667	1.21537	1.37345	1.25431	0.0136542	0.0331128	0.0183011
37	1.21622	1.3734	1.25955	0.013849	0.0331336	0.0182994
37.3333	1.2247	1.37653	1.26363	0.0145997	0.0331288	0.0181299
37.6667	1.22567	1.38081	1.26598	0.0143831	0.032742	0.0182958
38	1.22799	1.38228	1.26709	0.0143394	0.0325063	0.0178622
38.3333	1.23484	1.38569	1.2734	0.0149721	0.0327983	0.0185265
38.6667	1.2334	1.39118	1.27737	0.0152748	0.032731	0.0187296
39	1.23622	1.39086	1.27696	0.015482	0.0325835	0.018746
39.3333	1.23773	1.39656	1.28243	0.0157646	0.0324067	0.0185894
39.6667	1.24344	1.40293	1.28967	0.016204	0.0323939	0.018307
40	1.24378	1.40637	1.29205	0.015925	0.0323893	0.0186724
40.3333	1.24403	1.40544	1.29157	0.0159613	0.0327122	0.0190159
40.6667	1.24882	1.41009	1.28879	0.016443	0.032607	0.0195558
41	1.25069	1.41025	1.29977	0.0164474	0.0321511	0.0194121
41.3333	1.2495	1.41339	1.30349	0.016725	0.0322583	0.0197979
41.6667	1.26131	1.41228	1.30078	0.0166827	0.0324084	0.0194428
42	1.26473	1.41202	1.31101	0.0173037	0.0322674	0.0194988
42.3333	1.27593	1.41924	1.30947	0.0176348	0.0322214	0.0203159
42.6667	1.26959	1.42452	1.31456	0.0171114	0.0318042	0.0201495
43	1.2714	1.42866	1.31324	0.017645	0.031652	0.0195893
43.3333	1.27866	1.43537	1.32136	0.0176965	0.0317115	0.0197434
43.6667	1.28034	1.43906	1.32349	0.0180063	0.0313612	0.0203139
44	1.28565	1.43806	1.32745	0.0184566	0.0311415	0.0200435
44.3333	1.28503	1.43822	1.33858	0.0189769	0.0310893	0.0206537
44.6667	1.28835	1.44278	1.34539	0.018785	0.0310816	0.0208061
45	1.29595	1.44345	1.34796	0.0195783	0.0308161	0.021766
45.3333	1.29753	1.44379	1.3479	0.0200955	0.0304432	0.0210768
45.6667	1.30656	1.44339	1.3548	0.0204169	0.0303825	0.0207645
46	1.31409	1.44903	1.35514	0.0209607	0.0300603	0.0213159
46.3333	1.31296	1.45181	1.35544	0.0212236	0.0300848	0.0218553
46.6667	1.32069	1.45698	1.36413	0.0213391	0.0298967	0.0223233
47	1.32735	1.45891	1.35293	0.0216534	0.0293044	0.0236619
47.3333	1.32283	1.45933	1.36568	0.0218031	0.0294378	0.0221265
47.6667	1.33542	1.45986	1.36564	0.0226761	0.0294622	0.0225808
48	1.3398	1.46387	1.37498	0.0235443	0.0294623	0.022329
48.3333	1.34526	1.46774	1.37767	0.0243609	0.0295897	0.0223776
48.6667	1.34843	1.46523	1.38146	0.0246979	0.0290653	0.0229182
49	1.35332	1.46507	1.38073	0.0249601	0.028418	0.0227199
49.3333	1.3552	1.47112	1.38339	0.0251913	0.0281336	0.0224383
49.6667	1.35937	1.47378	1.38441	0.025608	0.0282895	0.0234026
50	1.36159	1.47297	1.38829	0.0257786	0.0281465	0.0237511
50.3333	1.36049	1.47132	1.39007	0.0259904	0.0281703	0.0239408
50.6667	1.3674	1.47437	1.39189	0.0258647	0.0280951	0.0240414
51	1.37271	1.47676	1.39447	0.0264229	0.0279791	0.0244122
51.3333	1.3722	1.47885	1.39767	0.0268369	0.0279893	0.0242262
51.6667	1.37351	1.47856	1.39718	0.0273158	0.0277803	0.0236996
52	1.37282	1.4789	1.39051	0.0277288	0.0274736	0.0267744
52.3333	1.37393	1.48121	1.4129	0.0273255	0.0273684	0.0244857
52.6667	1.37774	1.48162	1.41614	0.0281321	0.0273683	0.0244343
53	1.38012	1.4833	1.42442	0.0283497	0.0274074	0.0247624
53.3333	1.38268	1.48153	1.42213	0.0278231	0.0272603	0.0251136
53.6667	1.38348	1.48653	1.42612	0.0279618	0.0268436	0.02464
54	1.38728	1.4851	1.42925	0.0279643	0.0270569	0.0253932
54.3333	1.38638	1.48549	1.42809	0.0278761	0.0267937	0.025663
54.6667	1.38506	1.48648	1.43831	0.0277691	0.0265973	0.0259437
55	1.38709	1.48848	1.43312	0.0275894	0.0261369	0.0257335
55.3333	1.38969	1.48925	1.43594	0.0272821	0.0260448	0.026083
55.6667	1.39053	1.49278	1.44309	0.0271228	0.0261319	0.0263464
56	1.38776	1.49305	1.44429	0.0268217	0.0258641	0.0266269
56.3333	1.39301	1.49693	1.45684	0.0266792	0.0256654	0.0260657
56.6667	1.39542	1.49687	1.45514	0.0270008	0.0257846	0.0267804
57	1.3929	1.49638	1.45595	0.0267014	0.0253369	0.0267276
57.3333	1.39987	1.49636	1.45937	0.0262674	0.0255193	0.0271452
57.6667	1.39783	1.4947	1.45665	0.0261792	0.0252109	0.0276601
58	1.39876	1.49402	1.46114	0.0259086	0.0249112	0.0278418
58.3333	1.40046	1.4937	1.46057	0.0260703	0.0247099	0.0278729
58.6667	1.40072	1.49442	1.46505	0.0258521	0.0245651	0.0275967
59	1.40231	1.4901	1.46803	0.02612	0.0245482	0.0280052
59.3333	1.40577	1.48376	1.4717	0.025705	0.0244432	0.0283973
59.6667	1.40254	1.48845	1.48153	0.0263706	0.024545	0.0290596
60	1.40095	1.48871	1.48223	0.0257348	0.0242384	0.0288375
60.3333	1.39937	1.48009	1.48819	0.0260216	0.0240791	0.0288113
60.6667	1.39974	1.46986	1.49925	0.0255132	0.024315	0.0291772
61	1.39768	1.46823	1.48811	0.0251095	0.0239811	0.0301078
61.3333	1.39326	1.46634	1.48079	0.0255353	0.0237772	0.0292152
61.6667	1.39912	1.46166	1.47914	0.0251181	0.0239143	0.0303011
62	1.40062	1.45889	1.49213	0.0252332	0.0238831	0.0297027
62.3333	1.39904	1.46566	1.49479	0.0257471	0.0236043	0.0303063
62.6667	1.41096	1.46505	1.49726	0.0265479	0.0232674	0.0300268
63	1.4122	1.46821	1.4971	0.0274622	0.0233211	0.0308942
63.3333	1.41811	1.4712	1.49894	0.0271318	0.0230973	0.0303624
63.6667	1.41814	1.46856	1.49089	0.0275836	0.0235357	0.0304418
64	1.41998	1.46339	1.49273	0.0272274	0.0234169	0.0307818
64.3333	1.41913	1.4575	1.49435	0.0271242	0.0233907	0.0314732
64.6667	1.42103	1.45071	1.49998	0.0275887	0.0238587	0.0310057
65	1.42161	1.4541	1.50325	0.0272355	0.0237384	0.0315369
