# Supplementary material for: Movement of accessible plasma membrane cholesterol by the GRAMD1 lipid transfer protein complex
Source: eLife. 2019 Nov 14;8:e51401. doi: 10.7554/eLife.51401 (PMC6905856; doi:10.7554/eLife.51401)
Supplement: Figure 4—figure supplement 2—source data 1. [file elife-51401-fig4-figsupp2-data1.xlsx]

## Sheet: Source data Figure 4-S-2 B
Source data for Figure 4-figure supplement 2 B
F/F0 (Left)								Dot Plot (Right)
	Average			SEM				Individual Values
Time (min)	EGFP-GRAM1b	mCherry-LactC2	iRFP-PHPLCδ	EGFP-GRAM1b	mCherry-LactC2	iRFP-PHPLCδ		EGFP-GRAM1b		mCherry-LactC2		iRFP-PHPLCδ
0	0.98282	0.997291	1.00714	0.00256989	0.00524915	0.00424944		MCD -	MCD +	MCD -	MCD +	MCD -	MCD +
0.333333	0.981374	0.998265	1.00778	0.0023774	0.00483758	0.00385466		0.166768	-0.005115	0.170256	0.020702	0.10222	0.211304
0.666667	0.984584	0.99842	1.0063	0.00254881	0.00479159	0.00345848		0.173691	-0.040759	0.150456	0.008699	0.058533	0.087807
1	0.984347	1.00251	1.00547	0.00225206	0.00421069	0.0030423		0.455247	0.269422	0.284928	0.167323	0.300548	0.440426
1.33333	0.98612	1.00724	1.00421	0.00198305	0.0043721	0.00256088		0.241687	0.021371	0.189103	-0.061539	0.105339	0.204043
1.66667	0.986209	1.00279	1.00384	0.00201758	0.0039008	0.00224925		0.203822	0.040481	0.109925	-0.037933	-0.002722	0.054535
2	0.992433	1.00277	1.00476	0.00260367	0.00396565	0.00199449		0.169326	0.012237	0.075116	-0.150268	-0.070147	-0.063626
2.33333	0.999118	1.00121	1.00349	0.00255314	0.00348497	0.00177186		0.295348	0.117362	0.168964	-0.029932	0.038021	0.044711
2.66667	1.00042	0.995106	0.999814	0.00201021	0.00248482	0.00142977		0.728373	0.420261	0.96695	0.738937	0.202231	0.370963
3	0.99424	1.00107	1.00109	0.00142867	0.00165121	0.00136481		0.249837	-0.077166	0.061438	-0.123771	0.045326	0.132013
3.33333	0.99637	1.00429	1.00302	0.00159092	0.00139407	0.00134841		0.269429	-0.018923	0.08028	-0.107031	0.01006	0.142556
3.66667	0.997127	1.00078	1.00094	0.000779246	0.00102918	0.000986675		0.226336	-0.195152	0.042336	-0.195003	-0.056155	0.138342
4	1.00262	0.998771	0.997657	0.00117064	0.00157141	0.00143223		0.426528	-0.185219	0.077554	-0.151322	0.020368	0.231669
4.33333	1.00391	0.999726	0.997583	0.00234854	0.00235645	0.00142273		1.27362	-0.019167	0.069467	-0.074196	0.336401	-0.198213
4.66667	1.00532	1.00025	0.99989	0.00193235	0.00223724	0.00151192		0.185462	0.021322	0.217597	0.157583	0.068528	0.1885
5	1.01068	0.9723	0.996228	0.00465874	0.00699276	0.00792716		0.262744	0.074912	0.23292	0.116551	0.17068	0.335768
5.33333	1.00933	0.980211	0.999769	0.00411213	0.00572115	0.00614679		0.168359	-0.147928	0.134701	-0.11813	0.092591	0.233657
5.66667	1.02014	0.986367	1.00037	0.00481919	0.00529337	0.0069539		0.691739	0.086865	0.409401	0.029393	0.321155	0.328075
6	1.02397	0.996404	1.00113	0.00510705	0.00462811	0.00697783		0.548664	-0.008049	0.124777	-0.181189	0.224498	0.273448
6.33333	1.02587	1.00164	1.00262	0.00571073	0.00457871	0.00720565		0.845797	0.01946	-0.032664	-0.276401	0.048686	-0.251057
6.66667	1.02308	1.00918	1.00707	0.00557202	0.00459827	0.00812466		0.570916	0.315598	0.288332	-0.077604	0.566291	0.57124
7	1.0294	1.01749	1.01243	0.00519415	0.00466015	0.00836813		1.23868	-0.161189	-0.184854	-0.231766	0.234775	-0.18056
7.33333	1.03367	1.01659	1.0148	0.00534155	0.00507818	0.00854041		0.961375	-0.160429	-0.136134	-0.260387	0.152287	-0.216954
7.66667	1.04145	1.01566	1.01175	0.00541873	0.00516695	0.00826856		0.392029	0.142328	0.071271	-0.159129	0.149735	0.148686
8	1.03987	1.02464	1.0139	0.00517791	0.0054259	0.00827129		0.34551	-0.016896	-0.002975	-0.28437	0.025093	0.025982
8.33333	1.04274	1.02452	1.0162	0.00550099	0.00597965	0.00842529		0.910072	-0.105064	-0.154919	-0.354747	-0.058255	-0.476259
8.66667	1.04987	1.02686	1.01875	0.00629979	0.00594711	0.00884091		0.211846	-0.054205	-0.016401	-0.227455	-0.124819	-0.139296
9	1.0488	1.02795	1.01973	0.00629293	0.00628218	0.00917285		0.027335	-0.140812	-0.121746	-0.305495	-0.267604	-0.340842
9.33333	1.05074	1.03193	1.01994	0.0055447	0.00665541	0.0099289		1.18978	0.045564	0.004208	-0.131724	0.749009	-0.060423
9.66667	1.04913	1.03312	1.01945	0.00571832	0.00696136	0.0104692		0.715001	-0.171441	-0.062689	-0.284992	-0.032518	-0.14541
10	1.05338	1.03174	1.01811	0.00617439	0.00719662	0.0111937		0.420968	-0.048339	-0.117616	-0.1496	-0.040992	-0.047812
10.3333	1.06806	1.02383	1.01688	0.00700198	0.00693525	0.0115161		0.767073	-0.107985	-0.157319	-0.150995	0.035964	-0.249711
10.6667	1.07102	1.02362	1.01603	0.00795148	0.00695995	0.0117492		0.776937	-0.108776	-0.082693	-0.060427	0.112809	-0.075912
11	1.06826	1.02889	1.0174	0.00799605	0.00731478	0.0114757
11.3333	1.06882	1.03057	1.01797	0.0084795	0.00726016	0.0121435
11.6667	1.07395	1.02468	1.01801	0.00847283	0.00749969	0.0134811
12	1.07578	1.0272	1.01528	0.00786517	0.00736491	0.0134522
12.3333	1.07138	1.02862	1.01668	0.00800769	0.00787869	0.0135394
12.6667	1.07425	1.03209	1.01508	0.00760661	0.00775393	0.0142251
13	1.07461	1.03244	1.01704	0.00801156	0.00817415	0.0147125
13.3333	1.07721	1.02967	1.01777	0.00868364	0.00843144	0.0153888
13.6667	1.08438	1.02651	1.01787	0.00888973	0.00863944	0.015205
14	1.09022	1.02495	1.01875	0.00971963	0.00844572	0.0158695
14.3333	1.09136	1.02605	1.02042	0.0100795	0.0087068	0.0161459
14.6667	1.09411	1.02953	1.02216	0.0105764	0.00894331	0.0149961
15	1.09891	1.03186	1.02308	0.0105905	0.00919779	0.0164529
15.3333	1.1013	1.02791	1.02042	0.011596	0.00914638	0.0154015
15.6667	1.10014	1.02963	1.02166	0.0111176	0.00931523	0.0156598
16	1.10567	1.03051	1.02147	0.0120664	0.00968214	0.0159417
16.3333	1.10713	1.02848	1.02251	0.0130287	0.00997237	0.0167682
16.6667	1.1118	1.02602	1.02268	0.0133578	0.0104638	0.017188
17	1.11626	1.02847	1.02198	0.0133778	0.0104768	0.0173011
17.3333	1.11668	1.03094	1.02331	0.0132076	0.0105646	0.0176866
17.6667	1.11721	1.02958	1.02429	0.0128593	0.0106171	0.0178214
18	1.12167	1.02468	1.02564	0.0137573	0.011229	0.0192984
18.3333	1.1273	1.02525	1.02752	0.0135879	0.0110997	0.0189276
18.6667	1.13376	1.02385	1.02706	0.0143277	0.0117332	0.0188543
19	1.14185	1.0208	1.0274	0.0146786	0.0115007	0.0181706
19.3333	1.14717	1.01811	1.03042	0.0154888	0.0116804	0.0194739
19.6667	1.15353	1.02079	1.032	0.0165938	0.0117206	0.0186263
20	1.16137	1.01601	1.03311	0.017539	0.0120006	0.0197431
20.3333	1.16842	1.01163	1.03261	0.0176585	0.0120165	0.0195407
20.6667	1.17232	1.01403	1.03498	0.0178937	0.0122072	0.0205599
21	1.18105	1.01461	1.03597	0.0182531	0.0120389	0.0206839
21.3333	1.1889	1.01061	1.03702	0.0186263	0.0119861	0.0206148
21.6667	1.19042	1.01263	1.03928	0.0186891	0.0124679	0.0200731
22	1.19334	1.01115	1.04104	0.0186906	0.0126508	0.0207631
22.3333	1.20361	1.01125	1.04115	0.0195055	0.0127062	0.020849
22.6667	1.20534	1.01045	1.04303	0.0197853	0.0127144	0.0209375
23	1.2022	1.01126	1.04266	0.0199385	0.0130689	0.0206754
23.3333	1.20459	1.0165	1.04575	0.0198379	0.0134685	0.0213033
23.6667	1.21289	1.01489	1.04873	0.019997	0.0136398	0.0219631
24	1.21612	1.02006	1.04905	0.0212262	0.0135679	0.0215628
24.3333	1.22348	1.02042	1.05005	0.0214361	0.013678	0.020988
24.6667	1.227	1.01696	1.05064	0.0215846	0.0135809	0.02129
25	1.23005	1.01749	1.05063	0.0213724	0.013786	0.0213441
25.3333	1.23613	1.01328	1.04955	0.0218677	0.0142232	0.0220939
25.6667	1.24252	1.01513	1.05513	0.0226157	0.0146894	0.0236691
26	1.25088	1.01265	1.0543	0.0224114	0.014802	0.021766
26.3333	1.25514	1.01358	1.05472	0.0229067	0.0148292	0.0225681
26.6667	1.25357	1.01298	1.05517	0.0228742	0.014919	0.0221842
27	1.25229	1.01366	1.05753	0.0229278	0.0150551	0.0219858
27.3333	1.26111	1.01382	1.05986	0.024084	0.0153002	0.0221911
27.6667	1.2676	1.01641	1.06221	0.0246864	0.0156668	0.0229128
28	1.27057	1.01507	1.06172	0.0244714	0.0157651	0.0228959
28.3333	1.27302	1.01655	1.06114	0.0245778	0.0156117	0.0223046
28.6667	1.2782	1.01661	1.06333	0.024953	0.015743	0.0225579
29	1.28699	1.01459	1.06416	0.0255861	0.016036	0.0224542
29.3333	1.29246	1.01496	1.06283	0.0258597	0.0161773	0.0211545
29.6667	1.29744	1.01281	1.06546	0.0260648	0.0164357	0.0222397
30	1.30978	1.01138	1.06703	0.0267293	0.0168095	0.0227425
30.3333	1.31134	1.00976	1.0706	0.0268502	0.0168753	0.0227536
30.6667	1.319	1.01341	1.07291	0.0269856	0.0167724	0.0233161
31	1.32004	1.01259	1.07481	0.0280249	0.0173041	0.0245666
31.3333	1.32574	1.01315	1.07638	0.0290561	0.0172252	0.0247148
31.6667	1.32916	1.01059	1.0767	0.0287921	0.0175133	0.0243622
32	1.33168	1.01014	1.07866	0.0293216	0.0178056	0.0253084
32.3333	1.33471	1.00981	1.07827	0.0294902	0.0177847	0.0255953
32.6667	1.34205	1.00995	1.0799	0.030382	0.0182221	0.0261599
33	1.34728	1.01113	1.08328	0.0310676	0.018271	0.0255591
33.3333	1.35177	1.01355	1.0835	0.0312789	0.018746	0.025018
33.6667	1.35369	1.01268	1.08616	0.031896	0.0189398	0.0261006
34	1.36127	1.01264	1.08529	0.0323732	0.0190554	0.0261417
34.3333	1.36209	1.01255	1.08763	0.0331724	0.0191757	0.0264569
34.6667	1.36366	1.01138	1.08885	0.0332998	0.0191737	0.0263452
35	1.36788	1.01581	1.08962	0.033599	0.0194044	0.0277323
35.3333	1.3756	1.01317	1.09011	0.0339647	0.0197472	0.0276827
35.6667	1.38016	1.01773	1.09114	0.0349359	0.0200614	0.0264103
36	1.38572	1.01978	1.0937	0.0348175	0.0205427	0.0276528
36.3333	1.38147	1.01996	1.09609	0.0353692	0.020551	0.0276061
36.6667	1.38617	1.01902	1.09484	0.0359565	0.0207674	0.0273228
37	1.39118	1.02151	1.09956	0.036617	0.0209906	0.0289561
37.3333	1.40415	1.02007	1.09943	0.0372688	0.0211552	0.0281791
37.6667	1.40161	1.01889	1.0995	0.0369124	0.0213667	0.0286614
38	1.40751	1.02285	1.10412	0.0372059	0.0216132	0.0294035
38.3333	1.41002	1.02007	1.10471	0.0379585	0.021466	0.0303211
38.6667	1.41342	1.01875	1.10432	0.0383289	0.0216916	0.0291845
39	1.41868	1.0207	1.10656	0.0393224	0.0218885	0.0307774
39.3333	1.42051	1.01979	1.10517	0.0392141	0.0221909	0.0295087
39.6667	1.42096	1.02256	1.10441	0.0394467	0.0223933	0.0291077
40	1.42337	1.01898	1.10325	0.0399856	0.0224606	0.0284843
40.3333	1.42902	1.0167	1.10242	0.0400011	0.0226662	0.0286077
40.6667	1.43438	1.01892	1.10243	0.0404696	0.0227343	0.0289624
41	1.43038	1.01794	1.10366	0.0407276	0.0229484	0.0283497
41.3333	1.43563	1.01815	1.10465	0.0412182	0.0231062	0.0293289
41.6667	1.44085	1.01511	1.10396	0.0413413	0.0231221	0.0292032
42	1.44527	1.01691	1.10433	0.0423184	0.0235313	0.0294929
42.3333	1.45008	1.01613	1.10717	0.0426213	0.0233456	0.0297248
42.6667	1.44756	1.02525	1.106	0.0428512	0.023718	0.0296887
43	1.451	1.0237	1.10782	0.0429999	0.0244696	0.0299068
43.3333	1.45696	1.01989	1.10768	0.0429801	0.0238144	0.0299267
43.6667	1.46288	1.02359	1.10918	0.0440224	0.0241354	0.0302271
44	1.4614	1.02612	1.10718	0.0442659	0.0246851	0.0296546
44.3333	1.45767	1.02664	1.10956	0.0443031	0.0248802	0.0300384
44.6667	1.46122	1.02708	1.10763	0.0444016	0.0251833	0.0302092
45	1.46608	1.02781	1.10799	0.0444771	0.0250665	0.0301847
45.3333	1.47096	1.02299	1.10888	0.0454766	0.0249704	0.0308959
45.6667	1.47355	1.02341	1.10637	0.0452717	0.0252859	0.0303935
46	1.47069	1.0284	1.10711	0.0461577	0.0258265	0.0302882
46.3333	1.47425	1.02904	1.10889	0.0467911	0.0261411	0.0305621
46.6667	1.47666	1.02909	1.10809	0.0469083	0.0258578	0.0302634
47	1.47603	1.03125	1.10808	0.0475381	0.0263083	0.0305976
47.3333	1.47893	1.03136	1.10669	0.0482322	0.0263063	0.030451
47.6667	1.47955	1.03257	1.1071	0.0481682	0.0267038	0.0307565
48	1.48096	1.03362	1.1033	0.0488011	0.0267533	0.0295699
48.3333	1.47677	1.03667	1.1044	0.0485729	0.0270348	0.0298997
48.6667	1.48482	1.03329	1.10436	0.0496266	0.0272554	0.0300956
49	1.48562	1.03754	1.10207	0.050057	0.0273993	0.0297352
49.3333	1.4954	1.03616	1.10704	0.0500869	0.0274836	0.0298535
49.6667	1.49092	1.0314	1.10411	0.0504892	0.0272873	0.0299299
50	1.49737	1.03125	1.10372	0.0500725	0.0279866	0.0302521
50.3333	1.49806	1.02764	1.0994	0.0505614	0.0293529	0.0295436
50.6667	1.49993	1.03542	1.10392	0.0509292	0.0287307	0.0299164
51	1.49876	1.03637	1.1049	0.0512479	0.0287544	0.0295668
51.3333	1.50728	1.03518	1.10474	0.0516324	0.0286238	0.0305791
51.6667	1.509	1.03574	1.10566	0.0524441	0.0285725	0.0310799
52	1.51471	1.03495	1.10413	0.0525556	0.0291026	0.030636
52.3333	1.51269	1.03658	1.10574	0.0529545	0.0292103	0.03127
52.6667	1.50336	1.04544	1.10311	0.0534076	0.0306591	0.0298638
53	1.50547	1.041	1.10507	0.0538039	0.0305376	0.0311085
53.3333	1.50217	1.05104	1.10665	0.0543263	0.0312315	0.0308994
53.6667	1.49396	1.05387	1.10748	0.0553302	0.032449	0.031615
54	1.49875	1.05309	1.10599	0.0553529	0.0314558	0.0301797
54.3333	1.49685	1.05586	1.10864	0.0553622	0.0320311	0.0318569
54.6667	1.49815	1.05648	1.1078	0.0558742	0.0321816	0.031533
55	1.48875	1.06329	1.10725	0.0567456	0.0333985	0.0311372
55.3333	1.49062	1.06627	1.10665	0.0570911	0.0341121	0.0310997
55.6667	1.49074	1.0671	1.10666	0.0568511	0.0345782	0.0296098
56	1.49543	1.0643	1.11004	0.0574565	0.0347015	0.0316552
56.3333	1.49506	1.06702	1.10954	0.0577113	0.0352368	0.0309921
56.6667	1.49189	1.07174	1.11194	0.0583884	0.0355597	0.0323926
57	1.49654	1.0721	1.11074	0.0579932	0.0343613	0.0316208
57.3333	1.49893	1.06959	1.11156	0.0577756	0.0345019	0.0322335
57.6667	1.49691	1.07136	1.11045	0.0579233	0.0350009	0.0317078
58	1.50236	1.06978	1.111	0.0586063	0.0348604	0.0324105
58.3333	1.50681	1.07126	1.11076	0.0595091	0.0355873	0.0325053
58.6667	1.50221	1.07424	1.11344	0.0593072	0.0353973	0.0330739
59	1.50175	1.07687	1.11403	0.058917	0.0352616	0.0328256
59.3333	1.49788	1.07812	1.11413	0.0583054	0.0357435	0.0321852
59.6667	1.49735	1.07941	1.11247	0.0587296	0.0354728	0.0321365
60	1.49875	1.08427	1.11435	0.0592774	0.0354781	0.033105
60.3333	1.49469	1.08889	1.11162	0.059361	0.0360519	0.0321936
60.6667	1.50144	1.08623	1.11507	0.0591933	0.0366238	0.0335942
61	1.50094	1.08843	1.11347	0.0596694	0.0369352	0.0334436
61.3333	1.49239	1.09263	1.11381	0.0605831	0.0375953	0.0334631
61.6667	1.49764	1.09205	1.11213	0.0601948	0.0376939	0.0327516
62	1.50162	1.0907	1.11078	0.0609727	0.0374656	0.032763
62.3333	1.49864	1.09236	1.11338	0.0603704	0.0374233	0.0340175
62.6667	1.49823	1.08999	1.11301	0.0600376	0.0378865	0.033641
63	1.49707	1.0916	1.11076	0.0599572	0.0376585	0.032921
63.3333	1.50037	1.0926	1.10866	0.059835	0.03799	0.0324445
63.6667	1.50305	1.09032	1.11037	0.0603575	0.0376915	0.0335943
64	1.50468	1.08816	1.10749	0.0605331	0.0371359	0.0328335
64.3333	1.50903	1.08765	1.10976	0.0611092	0.0375783	0.0342903
64.6667	1.50345	1.08937	1.10994	0.0604781	0.0376359	0.0339955
65	1.1597	1.1323	1.09528	0.0314392	0.0331153	0.0279137
65.3333	1.05041	1.14487	1.08208	0.021484	0.0346472	0.0263044
65.6667	1.04075	1.12317	1.06562	0.0217658	0.0359917	0.0261211
66	1.04138	1.08554	1.05214	0.0224398	0.0369666	0.0269755
66.3333	1.04118	1.04846	1.04382	0.0227104	0.0368359	0.0272243
66.6667	1.0398	1.02125	1.04161	0.0230458	0.0370399	0.028388
67	1.03637	0.998529	1.04293	0.0233024	0.0369829	0.0299356
67.3333	1.03675	0.982274	1.04337	0.0239947	0.0363259	0.0310255
67.6667	1.02713	0.972593	1.04374	0.0243955	0.0362172	0.0325916
68	1.01993	0.968713	1.04749	0.0240374	0.0354052	0.0337893
68.3333	1.01999	0.958395	1.04747	0.0244319	0.0357769	0.0351038
68.6667	1.01428	0.94961	1.04591	0.0242759	0.0353744	0.0361759
69	1.01196	0.945506	1.04575	0.0248444	0.0351511	0.0372744
69.3333	1.00732	0.936871	1.04614	0.0244441	0.0351499	0.0380847
69.6667	1.00534	0.930715	1.04826	0.0246589	0.0346924	0.0391626
70	1.0013	0.92369	1.04992	0.0245936	0.0353043	0.0398868
70.3333	0.997739	0.916798	1.04838	0.0244556	0.0349984	0.0402615
70.6667	0.994472	0.910774	1.05231	0.0247534	0.0348965	0.0411196
71	0.994205	0.907931	1.05368	0.0250744	0.0347941	0.0422387
71.3333	0.99047	0.906946	1.05578	0.0253669	0.0345228	0.0428963
71.6667	0.988436	0.899683	1.05604	0.0258491	0.0352553	0.0435689
72	0.987241	0.893642	1.05742	0.0259906	0.0347715	0.0443214
72.3333	0.989325	0.888599	1.05699	0.0264516	0.0349467	0.0455578
72.6667	0.985748	0.88169	1.05295	0.0264434	0.0349392	0.0469707
73	0.980088	0.877944	1.05002	0.0270752	0.0350392	0.0478934
73.3333	0.98093	0.875813	1.0477	0.0272503	0.0349764	0.0491733
73.6667	0.976667	0.870308	1.0472	0.0281372	0.0355885	0.05026
74	0.975212	0.865018	1.04683	0.0286105	0.0351051	0.0511599
74.3333	0.971433	0.863815	1.04459	0.0291553	0.0351506	0.0517844
74.6667	0.969078	0.859432	1.04191	0.0295946	0.03489	0.0524559
75	0.96435	0.855029	1.04081	0.0302894	0.0351983	0.0532676
