# Supplementary material for: Movement of accessible plasma membrane cholesterol by the GRAMD1 lipid transfer protein complex
Source: eLife. 2019 Nov 14;8:e51401. doi: 10.7554/eLife.51401 (PMC6905856; doi:10.7554/eLife.51401)
Supplement: Figure 4—figure supplement 3—source data 1. [file elife-51401-fig4-figsupp3-data1.xlsx]

## Sheet: Source data Figure 4-S-3 C,D
Source data for Figure 4-figure supplement 3 C
	Total		PM
	Control	TKO	Control	TKO
Replicate 1	20.985	22.391	44.804	45.097
Replicate 2	21.535	21.801	43.751	43.215
Replicate 3	21.485	22.469	41.358	43.08
Replicate 4	21.241	26.567	44.022	37.714
Source data for Figure 4-figure supplement 3 D
	Control				TKO
	Replicate 1	Replicate 2	Replicate 3	Replicate 4	Replicate 1	Replicate 2	Replicate 3	Replicate 4
Chol	2.13504	2.03165	1.92497	2.07246	2.01413	1.98221	1.91727	1.41956
CE	0.201724	0.200538	0.272317	0.211927	0.316564	0.286808	0.323096	0.343577
SM	1.97876	2.02987	2.02892	2.09296	2.04373	1.8659	1.94964	2.23863
PS	2.5305	2.92607	2.74622	2.81215	2.45566	2.60643	2.35188	2.83804
PC	0.602417	0.595757	0.62915	0.581336	0.572473	0.597057	0.619114	0.70279
PE	0.612012	0.615261	0.655037	0.629578	0.544557	0.591254	0.591914	0.708382
PtdIns	0.320338	0.3131	0.38249	0.320581	0.32982	0.381271	0.391028	0.508406
