# Supplementary material for: Movement of accessible plasma membrane cholesterol by the GRAMD1 lipid transfer protein complex
Source: eLife. 2019 Nov 14;8:e51401. doi: 10.7554/eLife.51401 (PMC6905856; doi:10.7554/eLife.51401)
Supplement: Figure 4—source data 1. [file elife-51401-fig4-data1.xlsx]

## Sheet: Source data Figure 4 E
Source data for Figure 4 E
F/F0 (EGFP-GRAM1b) (Left)						Dot Plot (Right)
	Average		SEM			Individual Values
Time (min)	Control	TKO	Control	TKO		Control	TKO
0	0.927803	0.981393	0.00396138	0.00260849		0.71715	1.39529
0.333333	0.931769	0.982912	0.00428216	0.00230022		0.370715	1.68236
0.666667	0.933433	0.983652	0.0040781	0.00276224		0.605204	0.997688
1	0.940599	0.987558	0.00424427	0.00234867		0.626374	1.33799
1.33333	0.946711	0.988226	0.00420327	0.00206558		0.570856	1.28925
1.66667	0.955193	0.989878	0.00388074	0.00186786		0.320826	1.15615
2	0.962202	0.993519	0.00370242	0.00186992		0.8163	1.31969
2.33333	0.967824	0.991745	0.00294349	0.00133248		0.832425	1.22381
2.66667	0.978154	0.997899	0.00174898	0.00112571		0.54515	2.04699
3	0.989643	0.996251	0.000881411	0.000881199		0.350927	1.39776
3.33333	0.997906	0.997754	0.000455659	0.000897857		0.907763	1.05254
3.66667	1.00124	0.999984	0.000692764	0.000836073		0.706294	1.06586
4	1.00603	1.00149	0.00083347	0.000891106		0.398079	0.852572
4.33333	1.01235	1.00369	0.000910413	0.000879911		0.685179	1.51628
4.66667	1.01467	1.00292	0.000979655	0.0015143		0.729519	1.72166
5	1.01295	1.01947	0.00234234	0.00482181		0.849524	0.982303
5.33333	0.993784	0.9977	0.00224616	0.00604802		0.576844	0.554688
5.66667	0.984232	0.989601	0.00254244	0.00691561		0.693126	0.603784
6	0.970948	0.982791	0.00254154	0.00753574		0.945895	0.921594
6.33333	0.958778	0.979526	0.00334652	0.0090718		1.17957	1.13455
6.66667	0.957407	0.977113	0.00372428	0.0106868		0.933958	1.08548
7	0.966642	0.983573	0.00689174	0.0104093		0.330876	1.52126
7.33333	0.989745	1.01262	0.0135366	0.0123381		0.646694	1.32819
7.66667	1.02413	1.05211	0.0195306	0.0188987		0.618577	1.09634
8	1.05894	1.08772	0.0236907	0.0244945		0.827113	1.37109
8.33333	1.09881	1.12629	0.0264001	0.0284278		0.763685	1.80315
8.66667	1.13895	1.17944	0.028233	0.0314211		0.961543	1.42637
9	1.17509	1.2382	0.0298758	0.0344406		1.01302	0.714682
9.33333	1.21215	1.30117	0.0310814	0.0377301		1.13491	0.619187
9.66667	1.24777	1.35752	0.0319519	0.0411884		0.732047	1.61635
10	1.27722	1.41823	0.0331183	0.0431088		0.824835	2.01155
10.3333	1.30944	1.47187	0.0338764	0.0454151		0.474667	1.77717
10.6667	1.33888	1.51893	0.0338259	0.0462236		0.508115	1.55035
11	1.36836	1.56308	0.0339947	0.0464352		0.751794	0.762631
11.3333	1.39207	1.60245	0.034186	0.0463698		0.867947	0.594554
11.6667	1.41965	1.6329	0.0342203	0.0458118		0.842229	0.600687
12	1.43857	1.66441	0.0345257	0.0455723		0.733514	0.80492
12.3333	1.45505	1.69513	0.0343417	0.0452509		0.5063	1.46911
12.6667	1.46645	1.7242	0.034423	0.0451562		0.401972	1.53024
13	1.48181	1.74543	0.0346958	0.0446883		0.522424	1.17793
13.3333	1.49295	1.7672	0.0351534	0.0445486		0.481481	1.31918
13.6667	1.50101	1.78909	0.0356109	0.0437034		0.523724	1.40331
14	1.50447	1.80943	0.0358617	0.0427235		0.717947	2.22501
14.3333	1.50759	1.83179	0.0362882	0.0418592		0.518591	1.85322
14.6667	1.51917	1.84927	0.0362936	0.0409268		0.915616	1.2908
15	1.52545	1.85614	0.0365324	0.0408712		1.00925	1.53675
15.3333	1.52696	1.87127	0.0365315	0.0409064		0.799726	1.56703
15.6667	1.52762	1.88573	0.0365326	0.0403166		1.0458	1.65572
16	1.52847	1.90228	0.036511	0.040177		1.26042	1.43373
16.3333	1.53044	1.92112	0.0365779	0.0402029		0.360549	1.43835
16.6667	1.53165	1.92893	0.0367184	0.0402119		0.694253	1.57067
17	1.53576	1.93342	0.0367895	0.0398631		0.636571	2.04854
17.3333	1.53621	1.93968	0.0369492	0.0393461		0.767075	1.79993
17.6667	1.54257	1.94866	0.0372765	0.0392549		0.815049	1.39703
18	1.54318	1.95739	0.0374357	0.0392456		0.664022	1.42302
18.3333	1.54708	1.97008	0.0374222	0.0390477		0.413164	1.80026
18.6667	1.54674	1.97996	0.0379357	0.0387769		0.544979	1.9027
19	1.55074	1.98358	0.0381871	0.0389485		0.194707	1.43822
19.3333	1.5554	1.98899	0.0378489	0.0392534		0.862195
19.6667	1.55625	1.99471	0.0377651	0.0403186		0.624249
20	1.55457	2.017	0.0378269	0.040366		0.520755
20.3333	1.55018	2.02015	0.037937	0.0396763		0.727899
20.6667	1.54676	2.02386	0.0383396	0.0393352
21	1.54964	2.02712	0.0382502	0.0385769
21.3333	1.55736	2.0357	0.0381694	0.0383607
21.6667	1.55553	2.04303	0.0380944	0.0388264
22	1.55881	2.05419	0.0380166	0.0391265
22.3333	1.56276	2.06407	0.037975	0.0390927
22.6667	1.56434	2.07363	0.0377698	0.0394506
23	1.56898	2.08047	0.0376859	0.0395165
23.3333	1.56908	2.09059	0.0376693	0.0402408
23.6667	1.56948	2.0951	0.0373957	0.0403208
24	1.57381	2.10492	0.0372716	0.0404512
24.3333	1.57954	2.1059	0.0371713	0.0406916
24.6667	1.5866	2.10808	0.0368629	0.0399726
25	1.59174	2.10981	0.036683	0.0402344
25.3333	1.59026	2.11549	0.0363495	0.0404549
25.6667	1.5935	2.12618	0.0364565	0.0414839
26	1.6015	2.13497	0.0361637	0.0414314
26.3333	1.61081	2.14228	0.0354803	0.0409159
26.6667	1.61044	2.14776	0.0352385	0.0407376
27	1.61477	2.15168	0.0350759	0.0411738
27.3333	1.62459	2.15116	0.0347395	0.040898
27.6667	1.6231	2.15549	0.0349032	0.0405112
28	1.62542	2.15158	0.035193	0.0403701
28.3333	1.63037	2.16007	0.0347027	0.0399782
28.6667	1.63961	2.16901	0.0347068	0.0403542
29	1.64055	2.17242	0.0343566	0.0404922
29.3333	1.64503	2.17029	0.034403	0.0397594
29.6667	1.6519	2.16796	0.0341083	0.0399453
30	1.65385	2.17565	0.0338252	0.0404656
30.3333	1.65687	2.17454	0.033901	0.0399327
30.6667	1.65893	2.17788	0.0338835	0.0399132
31	1.66151	2.18642	0.0337624	0.0398165
31.3333	1.66238	2.18789	0.0338399	0.0399079
31.6667	1.66439	2.19322	0.0337553	0.0403626
32	1.66792	2.1942	0.0339431	0.0393326
32.3333	1.67323	2.19587	0.0342038	0.0394881
32.6667	1.67194	2.20484	0.0342878	0.0396796
33	1.67371	2.2114	0.0344407	0.0391943
33.3333	1.67398	2.21677	0.0343872	0.0400364
33.6667	1.67682	2.2134	0.0344125	0.0395281
34	1.67198	2.21512	0.0345553	0.0393055
34.3333	1.66959	2.21785	0.0345179	0.0393837
34.6667	1.66746	2.22555	0.0345104	0.0391447
35	1.6681	2.21511	0.0345759	0.0394209
35.3333	1.666	2.21554	0.0347513	0.0392634
35.6667	1.6635	2.2184	0.0346729	0.0399644
36	1.66307	2.22146	0.0346697	0.0399609
36.3333	1.66268	2.2217	0.0345084	0.0408072
36.6667	1.65782	2.22582	0.0346878	0.0410109
37	1.65689	2.22422	0.0345255	0.040081
37.3333	1.6515	2.22606	0.0346745	0.039094
37.6667	1.65768	2.22282	0.034987	0.0397175
38	1.65634	2.22418	0.0351499	0.0393384
38.3333	1.65111	2.23633	0.0355325	0.0385371
38.6667	1.65249	2.23383	0.0355609	0.0386188
39	1.65091	2.23978	0.0357635	0.0387045
39.3333	1.65436	2.23739	0.0360639	0.0386799
39.6667	1.64652	2.2432	0.0359041	0.0390479
40	1.64347	2.24818	0.0358408	0.0406815
40.3333	1.64435	2.24722	0.0360192	0.0409459
40.6667	1.64136	2.24622	0.0359855	0.0410057
41	1.63678	2.25179	0.0363691	0.0408809
41.3333	1.63463	2.25313	0.0361986	0.0409335
41.6667	1.6333	2.25799	0.0362053	0.0417377
42	1.63364	2.25615	0.0361376	0.0415582
42.3333	1.63668	2.25686	0.036302	0.0414537
42.6667	1.6412	2.26162	0.0363721	0.0420689
43	1.63493	2.25787	0.0361887	0.0419368
43.3333	1.63732	2.26559	0.0365	0.0424791
43.6667	1.63538	2.26555	0.0362317	0.0427161
44	1.6387	2.26723	0.0363558	0.0426916
44.3333	1.63638	2.2651	0.0359939	0.0422572
44.6667	1.63878	2.25727	0.0358794	0.0422554
45	1.63695	2.26832	0.0358964	0.0425496
45.3333	1.64046	2.27305	0.035888	0.0429265
45.6667	1.64203	2.27226	0.0355204	0.0429216
46	1.64356	2.27798	0.0357067	0.0430743
46.3333	1.64586	2.28273	0.0352724	0.0432447
46.6667	1.64825	2.27967	0.0351947	0.0435698
47	1.65383	2.27582	0.0354148	0.0434839
47.3333	1.65728	2.27914	0.0353167	0.0440585
47.6667	1.65914	2.28383	0.0351567	0.0440384
48	1.66228	2.28679	0.0352092	0.0442434
48.3333	1.66286	2.28469	0.0352343	0.0443238
48.6667	1.6655	2.28467	0.0351257	0.0451021
49	1.66905	2.28546	0.0353037	0.0450273
49.3333	1.67028	2.289	0.0350267	0.0452345
49.6667	1.67253	2.29309	0.0349913	0.0455326
50	1.67406	2.29329	0.0349612	0.0453513
50.3333	1.682	2.29719	0.0348304	0.045313
50.6667	1.68081	2.3009	0.0342684	0.0456944
51	1.68375	2.30379	0.0343499	0.0460701
51.3333	1.6859	2.29976	0.0340891	0.0462618
51.6667	1.69281	2.29906	0.0343036	0.0468304
52	1.69882	2.30439	0.0343692	0.0467346
52.3333	1.6993	2.29986	0.0341125	0.0473221
52.6667	1.70196	2.29743	0.0339542	0.0463234
53	1.7079	2.29643	0.0340239	0.0468829
53.3333	1.70779	2.29961	0.033967	0.047085
53.6667	1.70907	2.29953	0.0336365	0.0471864
54	1.70712	2.30296	0.0334357	0.0476079
54.3333	1.70883	2.30119	0.03333	0.0479308
54.6667	1.70629	2.29831	0.0334619	0.0477894
55	1.71028	2.30686	0.0330629	0.0481221
55.3333	1.7103	2.3096	0.0331743	0.0480501
55.6667	1.70797	2.31823	0.0330652	0.0485069
56	1.71257	2.3226	0.0328103	0.0485655
56.3333	1.7149	2.32626	0.0329114	0.0492635
56.6667	1.71074	2.3229	0.0325792	0.049096
57	1.70992	2.33249	0.0322777	0.0491777
57.3333	1.70991	2.33409	0.0323025	0.0488876
57.6667	1.71112	2.33224	0.0319652	0.0491664
58	1.71299	2.33386	0.0318913	0.0495137
58.3333	1.708	2.3322	0.0321186	0.0498465
58.6667	1.70672	2.33179	0.0317822	0.0498769
59	1.70464	2.32543	0.0315554	0.049488
59.3333	1.70828	2.32708	0.0314027	0.0501198
59.6667	1.70822	2.33675	0.0311243	0.050545
60	1.70648	2.33781	0.0308304	0.050457
60.3333	1.71366	2.33158	0.0309128	0.0504882
60.6667	1.71399	2.34399	0.030804	0.050556
61	1.70843	2.34475	0.0306385	0.0511083
61.3333	1.71198	2.34403	0.0302396	0.0508438
61.6667	1.71491	2.34293	0.0304595	0.0508835
62	1.70863	2.3458	0.0299256	0.0514358
62.3333	1.70498	2.34651	0.0297578	0.0511854
62.6667	1.70368	2.34943	0.02995	0.0517313
63	1.69929	2.33879	0.0294313	0.0514756
63.3333	1.69575	2.33477	0.0291749	0.0514307
63.6667	1.70245	2.33926	0.0290318	0.0518828
64	1.70761	2.34751	0.0289169	0.051866
64.3333	1.70424	2.35091	0.0285518	0.0527509
64.6667	1.69817	2.34935	0.0284249	0.0526968
65	1.69229	2.34858	0.0282762	0.0525624
