# Supplementary material for: Movement of accessible plasma membrane cholesterol by the GRAMD1 lipid transfer protein complex
Source: eLife. 2019 Nov 14;8:e51401. doi: 10.7554/eLife.51401 (PMC6905856; doi:10.7554/eLife.51401)
Supplement: Figure 5—figure supplement 1—source data 1. [file elife-51401-fig5-figsupp1-data1.xlsx]

## Sheet: Source data Figure 5-S-1 A,F,H
Source data for Figure 5-figure supplement 1 A
DHE (nmole)	Replicate 1	Replicate 2	Replicate 3
0	7214	7342	8393
1.25	17441	18075	17708
2.5	22989	22586	25407
3.75	28993	29379	29510
Source data for Figure 5-figure supplement 1F
	GRAMD1aStART	GRAMD1bStART	GRAMD1cStART
Replicate 1	0.12276	8.68e-06	0.001228
Replicate 2	0.12432	0.003122	6.92e-06
Replicate 3	0.11668	0.0081	6.684e-06
Source data for Figure 5-figure supplement 1H (Right)
	WT	5P	T469D
Replicate 1	22.4839	-4.48914	-5.7483
Replicate 2	17.8711	-4.66919	-9.51724
Replicate 3	16.7586	-7.26054	-8.33191
