# Supplementary material for: Movement of accessible plasma membrane cholesterol by the GRAMD1 lipid transfer protein complex
Source: eLife. 2019 Nov 14;8:e51401. doi: 10.7554/eLife.51401 (PMC6905856; doi:10.7554/eLife.51401)
Supplement: Figure 5—figure supplement 2—source data 1. [file elife-51401-fig5-figsupp2-data1.xlsx]

## Sheet: Source data Figure 5-S-2 B
Source data for Figure 5-figure supplement 2B
F/F0 (EGFP-GRAM1b) (Left)								Dot Plot (Right)
	Average			SEM				Individual Values
Time (min)	TKO	TKO + mRuby-GRAMD1b	TKO + mCherry-STARD4	TKO	TKO + mRuby-GRAMD1b	TKO + mCherry-STARD4		TKO	TKO + mRuby-GRAMD1b	TKO + mCherry-STARD4
0	0.973989	1.0267	1.03249	0.0040606	0.00621062	0.00686722		1.04552	0.746266	1.21659
0.333333	0.972512	1.02492	1.01559	0.00342811	0.00575788	0.0257164		0.908214	0.388649	1.57467
0.666667	0.973612	1.01935	1.02588	0.00357692	0.00512226	0.00623211		1.16291	0.26806	1.52387
1	0.981669	1.01914	1.02271	0.00340881	0.00476131	0.00623274		1.19186	0.392517	1.75453
1.33333	0.979626	1.01599	1.02347	0.00279732	0.00359149	0.00482393		0.391581	0.394282	1.03322
1.66667	0.982311	1.00954	1.0194	0.00254674	0.00298237	0.00503932		0.317169	0.49687	1.02996
2	0.985433	1.00513	1.01542	0.00231514	0.00249999	0.00444557		0.736354	0.797663	1.28299
2.33333	0.983412	1.00343	1.0108	0.00160238	0.00242991	0.00396614		0.401297	0.75438	1.20632
2.66667	0.991295	0.999842	1.01067	0.00165682	0.00154561	0.00350053		1.42174	0.427684	1.60332
3	0.995037	1.00017	1.0079	0.00144303	0.001298	0.00320252		1.26442	0.443682	0.819549
3.33333	0.995422	1.00034	1.00837	0.0022658	0.000976589	0.00337727		1.06123	0.287483	0.447055
3.66667	0.991357	0.999586	0.986889	0.00137771	0.00100155	0.0119999		0.3685	0.277346	0.213516
4	0.998632	1.00216	0.994235	0.00152676	0.00126874	0.00524111		0.720847	0.557716	0.425437
4.33333	1.00421	0.999047	0.989409	0.00135378	0.00100383	0.00435153		0.466299	0.351109	0.376651
4.66667	1.00842	1.00068	1.00253	0.00120385	0.0010867	0.00421687		0.488331	0.993536	0.937377
5	1.00692	0.998013	1.00757	0.0019702	0.0015161	0.00651339		0.510336	0.331483	0.732657
5.33333	1.04747	0.991403	1.00785	0.00832211	0.00227088	0.00654783		1.14108	0.34392	0.426261
5.66667	1.02239	0.997578	1.02656	0.00617677	0.00228749	0.0138884		1.30078	0.646384	0.276458
6	1.01556	1.01005	1.00905	0.00507036	0.00245814	0.00522542		0.876664	0.677278	0.472939
6.33333	1.00825	1.02137	1.00322	0.00652413	0.00313586	0.011237		1.21996	0.152839	1.00969
6.66667	1.00504	1.02212	1.01818	0.00693555	0.0025016	0.00748385		0.773556	0.167629	1.20989
7	1.00312	1.02448	1.00573	0.00693808	0.00260271	0.00527101		0.626012	0.20663	1.29492
7.33333	1.00595	1.02271	1.00075	0.00712587	0.00309644	0.00571728		0.981323	0.234914	0.35959
7.66667	1.0084	1.02473	1.004	0.00710079	0.00357003	0.00556388		1.20521	0.251316	0.865376
8	1.01239	1.02509	1.01165	0.00705222	0.00307886	0.00568001			0.609873	0.824278
8.33333	1.01368	1.027	1.01179	0.00727095	0.00354098	0.00561851			0.331865
8.66667	1.0169	1.03073	1.01758	0.00736934	0.00352085	0.00576465			0.288113
9	1.01935	1.03557	1.02207	0.00725855	0.00337932	0.00571347			0.949362
9.33333	1.02426	1.03734	1.02356	0.00770108	0.00362853	0.00591875
9.66667	1.02751	1.03926	1.0306	0.00780834	0.00398583	0.00749818
10	1.02947	1.03802	1.03717	0.00739442	0.0037042	0.0108557
10.3333	1.03171	1.04335	1.04568	0.00782204	0.00393874	0.0142051
10.6667	1.03852	1.04578	1.05626	0.00784688	0.00359516	0.0170374
11	1.04488	1.04829	1.06203	0.00793509	0.00440284	0.0197954
11.3333	1.04651	1.05056	1.07877	0.0082447	0.00437273	0.0216445
11.6667	1.05228	1.05057	1.08052	0.00846446	0.00418249	0.0243266
12	1.0563	1.05599	1.08305	0.00849261	0.00523532	0.0248155
12.3333	1.0627	1.05328	1.09249	0.00923375	0.00528508	0.0266511
12.6667	1.06103	1.06013	1.09882	0.00887776	0.00520753	0.0276036
13	1.06437	1.06116	1.10661	0.00931476	0.00529291	0.0291735
13.3333	1.06742	1.06462	1.12071	0.00962394	0.00575254	0.0310573
13.6667	1.07854	1.06629	1.12546	0.0101365	0.00552665	0.0333859
14	1.08958	1.07135	1.13278	0.0115131	0.00548416	0.0356837
14.3333	1.09306	1.07594	1.14688	0.0117938	0.00539463	0.0384683
14.6667	1.0997	1.07925	1.1614	0.0120661	0.0057896	0.0411282
15	1.10401	1.07752	1.17959	0.0127787	0.00631493	0.0448872
15.3333	1.10788	1.08169	1.18481	0.0131255	0.0061321	0.0500542
15.6667	1.11837	1.0866	1.21073	0.0144567	0.00619739	0.0533195
16	1.12135	1.09278	1.22045	0.0144423	0.00623826	0.0573913
16.3333	1.13152	1.09399	1.24768	0.0160821	0.00719513	0.0597439
16.6667	1.14155	1.09443	1.23316	0.0170771	0.00728342	0.0629699
17	1.15134	1.10284	1.23504	0.0184923	0.00816032	0.0683381
17.3333	1.1535	1.10578	1.23756	0.0189787	0.00787053	0.0699233
17.6667	1.15713	1.10267	1.26752	0.0197992	0.00755898	0.0680049
18	1.16841	1.10502	1.27179	0.0213395	0.00774952	0.0689634
18.3333	1.17394	1.10566	1.27739	0.0217657	0.00846364	0.0695617
18.6667	1.17746	1.11241	1.26492	0.0229064	0.00813315	0.071945
19	1.1804	1.11634	1.28148	0.0233505	0.00793859	0.0707357
19.3333	1.18575	1.11847	1.29583	0.0237541	0.00834334	0.0716664
19.6667	1.19104	1.12143	1.29013	0.0247316	0.00867442	0.0703967
20	1.19145	1.12939	1.26567	0.0251788	0.00861489	0.0779426
20.3333	1.20028	1.13242	1.31246	0.0264965	0.00918974	0.0689714
20.6667	1.20226	1.13911	1.30058	0.0266524	0.00946184	0.0715596
21	1.21329	1.14465	1.30776	0.027736	0.00969602	0.0716476
21.3333	1.22144	1.14314	1.31765	0.0288248	0.00985062	0.0745098
21.6667	1.21885	1.14211	1.31934	0.0285491	0.0096344	0.0729164
22	1.22139	1.1441	1.32383	0.0283965	0.00993047	0.0719301
22.3333	1.22762	1.15388	1.33844	0.0297648	0.0107688	0.072618
22.6667	1.22678	1.16127	1.32945	0.0299956	0.0113797	0.0734667
23	1.2302	1.15993	1.32591	0.0312639	0.010961	0.0718269
23.3333	1.23168	1.15488	1.33444	0.0319579	0.0114304	0.072541
23.6667	1.23672	1.16006	1.33658	0.0319986	0.0116299	0.0721824
24	1.2433	1.15494	1.34623	0.0323234	0.0114041	0.0714442
24.3333	1.24033	1.15707	1.33377	0.0326405	0.0114403	0.0758363
24.6667	1.24207	1.16252	1.34926	0.0342238	0.01124	0.0702599
25	1.24632	1.16593	1.36331	0.0342057	0.0112967	0.0710543
25.3333	1.24903	1.16856	1.37044	0.0347072	0.0115931	0.072901
25.6667	1.26277	1.1769	1.37515	0.0360413	0.0121888	0.072579
26	1.26417	1.18062	1.37538	0.035922	0.0125068	0.0703825
26.3333	1.26705	1.18379	1.3795	0.0371298	0.0130486	0.0708555
26.6667	1.26398	1.1864	1.3856	0.0370094	0.0129068	0.0712507
27	1.26824	1.18677	1.38919	0.0380829	0.0127208	0.0701443
27.3333	1.27471	1.18998	1.39939	0.0387368	0.0127176	0.0701471
27.6667	1.27484	1.19463	1.40769	0.0387386	0.0134737	0.0704753
28	1.28538	1.2029	1.42312	0.0398725	0.0133127	0.0729015
28.3333	1.29059	1.2057	1.42832	0.0400225	0.0135868	0.0718792
28.6667	1.2947	1.21262	1.42223	0.0414477	0.0140759	0.0716774
29	1.29592	1.21296	1.40688	0.0417511	0.0144035	0.0738636
29.3333	1.29484	1.21747	1.46277	0.0418951	0.014423	0.0729473
29.6667	1.29904	1.21904	1.44884	0.0423967	0.0148843	0.0729198
30	1.30421	1.2209	1.47359	0.0425072	0.0147468	0.0730537
30.3333	1.30998	1.22581	1.47111	0.0435522	0.0156362	0.0742675
30.6667	1.31065	1.22341	1.47863	0.0433367	0.015474	0.0747975
31	1.31353	1.23367	1.49183	0.0439213	0.0159738	0.076873
31.3333	1.31377	1.23795	1.50143	0.0440203	0.0162854	0.0771522
31.6667	1.32563	1.23656	1.5158	0.0450807	0.0161853	0.0774693
32	1.3306	1.2411	1.51898	0.046428	0.0164426	0.0777464
32.3333	1.32934	1.24243	1.53115	0.045882	0.0161311	0.0786771
32.6667	1.33023	1.24769	1.54176	0.046186	0.0162594	0.0787027
33	1.33793	1.25198	1.54804	0.0478709	0.0167503	0.0800868
33.3333	1.33079	1.2578	1.5583	0.0477244	0.0171022	0.0804123
33.6667	1.33107	1.25705	1.56493	0.0480286	0.017091	0.081184
34	1.33553	1.26116	1.56803	0.0482409	0.0173952	0.0818082
34.3333	1.3521	1.26497	1.56253	0.0491877	0.017427	0.088979
34.6667	1.35544	1.26583	1.58594	0.0492898	0.0174187	0.0843345
35	1.36411	1.26717	1.59401	0.0499835	0.0173736	0.0848667
35.3333	1.36388	1.26932	1.61124	0.0503614	0.0172818	0.0882055
35.6667	1.37858	1.27176	1.6161	0.051683	0.0180335	0.0892941
36	1.38512	1.27257	1.63092	0.0512538	0.0182421	0.0895857
36.3333	1.38363	1.28	1.63991	0.0517962	0.0186102	0.0920598
36.6667	1.38976	1.28017	1.65397	0.0523847	0.0189209	0.0934933
37	1.39339	1.28209	1.65724	0.0532624	0.0193034	0.0930479
37.3333	1.39563	1.2857	1.6804	0.0535478	0.0196363	0.0950922
37.6667	1.41087	1.28775	1.68755	0.0549022	0.019399	0.0972261
38	1.41734	1.29582	1.69572	0.0550204	0.0199501	0.0978666
38.3333	1.42109	1.29668	1.703	0.0567355	0.0200026	0.0987668
38.6667	1.42084	1.29789	1.71559	0.0567384	0.0201856	0.100088
39	1.43222	1.29679	1.71771	0.0583085	0.0210152	0.10076
39.3333	1.43621	1.30282	1.73124	0.0593521	0.0211326	0.102528
39.6667	1.43849	1.30164	1.75194	0.0599245	0.0214134	0.105615
40	1.44593	1.30447	1.75	0.0606332	0.0218201	0.103913
40.3333	1.46223	1.30842	1.74893	0.0614217	0.021921	0.102659
40.6667	1.46876	1.31159	1.76116	0.063205	0.0225234	0.103711
41	1.46647	1.31623	1.77929	0.0629424	0.0228579	0.106905
41.3333	1.47722	1.31985	1.78699	0.0630944	0.0233775	0.107274
41.6667	1.48079	1.32355	1.7922	0.0633766	0.0235498	0.106563
42	1.49225	1.3239	1.78688	0.0642791	0.0240455	0.106707
42.3333	1.4942	1.32195	1.78684	0.0652906	0.0241087	0.106411
42.6667	1.49586	1.32665	1.79721	0.0659522	0.0246915	0.107655
43	1.49749	1.33138	1.81356	0.0660683	0.0252458	0.110052
43.3333	1.50263	1.3353	1.82026	0.0656562	0.0259331	0.110314
43.6667	1.50965	1.34282	1.82389	0.0665693	0.026137	0.111827
44	1.52036	1.34198	1.82596	0.0668789	0.0268455	0.110689
44.3333	1.53239	1.34329	1.82492	0.0668582	0.0272407	0.110002
44.6667	1.53648	1.34668	1.83429	0.0672943	0.0274663	0.111886
45	1.54179	1.35412	1.8245	0.0674105	0.0280971	0.11373
45.3333	1.54331	1.3579	1.84105	0.0667894	0.0282372	0.110546
45.6667	1.54956	1.35464	1.84534	0.0676134	0.0285172	0.111055
46	1.55037	1.36169	1.8515	0.0672956	0.0294478	0.110697
46.3333	1.55742	1.36443	1.86225	0.0673938	0.0299322	0.111827
46.6667	1.56317	1.36366	1.86395	0.0672379	0.0300101	0.113041
47	1.56267	1.3619	1.86799	0.0668112	0.0302058	0.111434
47.3333	1.56127	1.35893	1.86957	0.065713	0.0307747	0.111341
47.6667	1.56746	1.3663	1.87706	0.0662364	0.0314689	0.113075
48	1.57435	1.36344	1.87882	0.067118	0.0313218	0.112226
48.3333	1.57298	1.36663	1.88548	0.0667381	0.031733	0.112377
48.6667	1.57794	1.37381	1.88826	0.0668465	0.0323827	0.11272
49	1.57539	1.37702	1.88959	0.0660443	0.0326668	0.113025
49.3333	1.58701	1.38139	1.88898	0.0664892	0.0330966	0.112066
49.6667	1.58733	1.37948	1.88917	0.0658866	0.0333093	0.111909
50	1.60143	1.37796	1.89265	0.0660674	0.0333903	0.112281
50.3333	1.60416	1.38305	1.8921	0.0664904	0.0331658	0.117717
50.6667	1.60333	1.38082	1.89841	0.0658522	0.0335794	0.111917
51	1.60899	1.38295	1.90503	0.0661689	0.0338946	0.112575
51.3333	1.6166	1.3874	1.90496	0.0667477	0.0343941	0.109945
51.6667	1.6145	1.38485	1.9141	0.0660956	0.034546	0.110367
52	1.61709	1.38591	1.90275	0.0653573	0.0348894	0.110017
52.3333	1.63076	1.38973	1.91003	0.0653257	0.0344978	0.108638
52.6667	1.6324	1.39221	1.915	0.0651632	0.0348539	0.109912
53	1.63786	1.39626	1.90375	0.0657144	0.0347033	0.107073
53.3333	1.63814	1.40215	1.90782	0.0650853	0.0353402	0.106605
53.6667	1.64458	1.4028	1.90925	0.0650811	0.0354634	0.106983
54	1.65519	1.40542	1.90825	0.0654834	0.0357137	0.104975
54.3333	1.66428	1.40628	1.91087	0.0653744	0.035794	0.105839
54.6667	1.68241	1.41078	1.91393	0.0662701	0.0357322	0.10558
55	1.69054	1.40286	1.91434	0.0662463	0.0351438	0.104748
55.3333	1.69535	1.40709	1.91997	0.0665137	0.03549	0.105277
55.6667	1.69801	1.39809	1.91988	0.0659749	0.0351392	0.104526
56	1.70578	1.39975	1.9177	0.0663538	0.0352143	0.104367
56.3333	1.71289	1.40432	1.90699	0.0667235	0.0353188	0.102188
56.6667	1.71718	1.41406	1.90881	0.0659614	0.0353247	0.10142
57	1.73033	1.41499	1.91494	0.067253	0.0356598	0.101747
57.3333	1.73322	1.41327	1.91796	0.066825	0.0358804	0.101965
57.6667	1.74037	1.42126	1.91553	0.0666983	0.0357549	0.101077
58	1.7443	1.4163	1.91593	0.0672251	0.0360606	0.101287
58.3333	1.74887	1.42527	1.91486	0.0672303	0.0364577	0.100287
58.6667	1.75122	1.42707	1.91204	0.0667847	0.0365485	0.099496
59	1.76228	1.42809	1.90955	0.0670644	0.0367895	0.0984932
59.3333	1.77209	1.42222	1.91191	0.0673063	0.0364556	0.0987927
59.6667	1.77474	1.42362	1.91824	0.0675288	0.0369539	0.0920477
60	1.78411	1.42463	1.89803	0.0667043	0.0369804	0.094061
60.3333	1.78537	1.42948	1.90477	0.0669282	0.037271	0.0953562
60.6667	1.7884	1.4246	1.90971	0.066862	0.0370893	0.0953117
61	1.79375	1.42669	1.90641	0.0675402	0.0377675	0.0948205
61.3333	1.80053	1.42285	1.91264	0.0669308	0.037603	0.095047
61.6667	1.79037	1.42715	1.92155	0.0665005	0.0377675	0.0962609
62	1.79657	1.43814	1.92965	0.0667874	0.0384778	0.0976302
62.3333	1.80007	1.44076	1.93076	0.0661528	0.0391039	0.0949113
62.6667	1.81271	1.44374	1.91848	0.0669525	0.0394716	0.0932962
63	1.82843	1.45435	1.91207	0.0679404	0.0393738	0.0926016
63.3333	1.83077	1.45526	1.91738	0.0676859	0.0398887	0.09207
63.6667	1.84675	1.45619	1.91075	0.0684722	0.0399273	0.0914282
64	1.84185	1.45534	1.91478	0.0677341	0.0400186	0.0911586
64.3333	1.85264	1.45456	1.91855	0.0684186	0.0404935	0.0914827
64.6667	1.85445	1.45132	1.92493	0.0691386	0.0404781	0.0919722
65	1.85755	1.45641	1.91668	0.0693904	0.0404106	0.0895116

## Sheet: Source data Figure 5-S-2 C
Source data for Figure 5-figure supplement 2 C
F/F0 (mCherry or mRuby) (Left)						Dot Plot (Right)
	Average		SEM			Individual Values
Time (min)	TKO + mRuby-GRAMD1b	TKO + mCherry-STARD4	TKO + mRuby-GRAMD1b	TKO + mCherry-STARD4		mRuby-GRAMD1b	mCherry-STARD4
0	0.994619	1.06558	0.0124426	0.0181603		0.850213	0.389843
0.333333	0.989623	1.07024	0.0125257	0.0171905		0.870795	0.40575
0.666667	0.99209	1.1061	0.0114732	0.0240325		0.624594	0.378096
1	0.984235	1.05894	0.0125162	0.0110564		1.2195	0.214853
1.33333	0.984406	1.03455	0.0120194	0.0105375		2.17752	-0.14804
1.66667	0.977023	1.03699	0.0136296	0.0111651		1.10106	-0.08155
2	0.998388	1.05397	0.00886103	0.0109429		2.06732	-0.13986
2.33333	0.99613	1.04434	0.00664415	0.0102145		2.5586	-0.16452
2.66667	1.00337	1.02341	0.00654063	0.00661669		1.70036	0.343121
3	0.99232	1.02957	0.00487055	0.00856745		-0.04113	0.516015
3.33333	0.996681	1.00643	0.00432771	0.00503667		1.15688	0.330916
3.66667	1.0082	1.00597	0.0039907	0.00454859		0.69325	0.497581
4	1.0099	1.00357	0.00414673	0.00483345		0.882918	0.364647
4.33333	1.00371	0.956477	0.00299836	0.0178857		0.348906	0.215944
4.66667	1.0023	1.00434	0.00531786	0.00678161		0.942634	0.254162
5	0.986891	0.993647	0.00941535	0.00825705		1.08434	0.225347
5.33333	0.975935	0.978509	0.00711434	0.0109378		0.641861	0.314177
5.66667	0.957446	1.01328	0.0107376	0.0158333		0.341973	0.298355
6	0.979822	0.988738	0.00560056	0.0110419		0.582256	0.028616
6.33333	0.983079	0.974971	0.00643551	0.0098508		-0.04013	0.361586
6.66667	0.976826	1.02591	0.00993501	0.026525		1.19657	0.419547
7	0.979386	0.995797	0.00824811	0.0198114		0.452658	0.264091
7.33333	0.978398	0.976889	0.00785615	0.00861748		0.238265	0.217525
7.66667	0.986004	0.95876	0.00851584	0.0113271		-0.11775	0.228229
8	0.984728	0.970734	0.0100829	0.0102151		0.577224	0.176827
8.33333	0.982642	0.958953	0.00998645	0.0100432		0.377806
8.66667	0.98495	0.956274	0.0106058	0.0130441		-0.0816
9	0.987323	0.962896	0.0101429	0.0109617		2.48766
9.33333	0.974691	0.969943	0.0105063	0.0115277
9.66667	0.980425	0.965691	0.0111523	0.0142532
10	0.97944	0.98113	0.0120056	0.0114053
10.3333	0.971585	0.96348	0.0139086	0.0128825
10.6667	0.981701	0.967891	0.0136077	0.0126958
11	0.995555	0.969397	0.0165944	0.0124609
11.3333	0.993248	0.958584	0.0161934	0.014748
11.6667	0.98562	0.966746	0.0152961	0.0140859
12	0.999297	0.950883	0.01674	0.0168621
12.3333	0.982761	0.979939	0.0159014	0.0154293
12.6667	0.983451	0.981846	0.0164719	0.0173801
13	0.976871	0.983313	0.0167458	0.0216041
13.3333	0.996676	0.987094	0.0201627	0.0209431
13.6667	0.995361	0.971917	0.0194956	0.0191724
14	1.00795	0.962237	0.0206001	0.0213726
14.3333	0.993606	0.995566	0.0198958	0.0196342
14.6667	0.997704	0.994963	0.0209077	0.0161017
15	0.994293	0.996553	0.0205331	0.018983
15.3333	1.00789	0.997678	0.0215714	0.0152711
15.6667	0.998399	0.962547	0.0198586	0.021921
16	1.00671	1.01257	0.0207759	0.0155672
16.3333	1.01228	1.00662	0.0235435	0.0167019
16.6667	1.00702	1.03479	0.0230006	0.0191343
17	1.02935	1.01665	0.0290649	0.0219893
17.3333	1.02344	1.00345	0.0295504	0.0339267
17.6667	1.03455	1.01746	0.0295404	0.0190357
18	1.0263	1.04014	0.0265938	0.021113
18.3333	1.04047	1.04297	0.0321751	0.0185212
18.6667	1.00906	1.04101	0.0263476	0.0171885
19	1.02309	1.04168	0.0288362	0.0182537
19.3333	1.04052	1.03259	0.0292651	0.0166826
19.6667	1.04366	1.02433	0.029505	0.0336793
20	1.04234	1.0483	0.0312613	0.0193262
20.3333	1.03307	1.07059	0.0310364	0.0204779
20.6667	1.03944	1.06329	0.03384	0.0205335
21	1.04053	1.04348	0.0346394	0.0204935
21.3333	1.03786	1.03755	0.032806	0.0203127
21.6667	1.04456	1.05024	0.0332907	0.0219472
22	1.05289	1.05307	0.0382736	0.0197677
22.3333	1.04337	1.06829	0.0370435	0.0230549
22.6667	1.04408	1.02714	0.0372674	0.0398225
23	1.04475	1.07201	0.0371025	0.0238059
23.3333	1.04347	1.07761	0.0336988	0.0241165
23.6667	1.0551	1.07332	0.0383744	0.0257957
24	1.0539	1.05378	0.0380756	0.0285285
24.3333	1.07167	1.0615	0.0414426	0.0353693
24.6667	1.06062	1.10506	0.0371495	0.0346386
25	1.06902	1.08642	0.0388033	0.0258339
25.3333	1.078	1.07047	0.0422275	0.027871
25.6667	1.06829	1.08953	0.040055	0.0262369
26	1.07872	1.07791	0.0411346	0.0263507
26.3333	1.08563	1.07197	0.0419963	0.0257039
26.6667	1.09183	1.08209	0.0454616	0.0280026
27	1.10454	1.05396	0.0474578	0.0280015
27.3333	1.12419	1.07489	0.0513537	0.0262651
27.6667	1.12554	1.08352	0.0500164	0.027338
28	1.1304	1.07981	0.0544645	0.0255836
28.3333	1.13958	1.08373	0.0550943	0.0288009
28.6667	1.12654	1.07531	0.0517012	0.0278104
29	1.14799	1.10384	0.0562766	0.0327518
29.3333	1.13715	1.05777	0.0526623	0.0296344
29.6667	1.14446	1.08975	0.0544979	0.0300856
30	1.14207	1.07284	0.058372	0.0284629
30.3333	1.15232	1.08309	0.0581838	0.0311825
30.6667	1.14502	1.08026	0.0567017	0.0297178
31	1.16766	1.07917	0.0585834	0.0297837
31.3333	1.15083	1.08629	0.0563036	0.0306495
31.6667	1.16995	1.07675	0.0640136	0.0295287
32	1.17488	1.07744	0.0615316	0.0286672
32.3333	1.17801	1.07805	0.0613122	0.0300004
32.6667	1.19344	1.11454	0.0626839	0.0362595
33	1.20286	1.0875	0.0670759	0.04031
33.3333	1.21305	1.09526	0.0669311	0.0306941
33.6667	1.20439	1.07605	0.0604858	0.0299696
34	1.22978	1.08567	0.0676889	0.0286893
34.3333	1.23754	1.08992	0.0689243	0.0291086
34.6667	1.23829	1.05751	0.0694524	0.0377356
35	1.2325	1.09259	0.0691263	0.029764
35.3333	1.24106	1.09028	0.0712458	0.0299521
35.6667	1.25982	1.08902	0.0742044	0.0305899
36	1.27543	1.08763	0.077436	0.0295147
36.3333	1.28035	1.09817	0.0799356	0.0310479
36.6667	1.29126	1.10787	0.0812327	0.0311308
37	1.28681	1.09387	0.0777684	0.0298927
37.3333	1.29368	1.10419	0.0771015	0.0321251
37.6667	1.29077	1.10117	0.0754853	0.0323473
38	1.31367	1.09574	0.0810143	0.0310571
38.3333	1.32987	1.10669	0.0864442	0.0331642
38.6667	1.34074	1.10245	0.0851887	0.0319771
39	1.34863	1.10865	0.0884187	0.031181
39.3333	1.35249	1.12401	0.0902278	0.0334677
39.6667	1.36529	1.11547	0.0892296	0.0315489
40	1.38433	1.12052	0.0946529	0.0331334
40.3333	1.39703	1.13149	0.097496	0.0339716
40.6667	1.41461	1.11979	0.0991174	0.0327785
41	1.41908	1.11945	0.100917	0.031538
41.3333	1.41413	1.12715	0.0979276	0.0316765
41.6667	1.41105	1.13689	0.0946718	0.0329444
42	1.44087	1.15148	0.105379	0.0349841
42.3333	1.4316	1.14365	0.101005	0.0330622
42.6667	1.44484	1.13365	0.101781	0.0332768
43	1.46232	1.13245	0.103509	0.0319479
43.3333	1.46567	1.14422	0.105444	0.0329084
43.6667	1.46615	1.14124	0.104707	0.0326903
44	1.49311	1.14058	0.110541	0.0333055
44.3333	1.49227	1.15706	0.1066	0.0350048
44.6667	1.49469	1.15921	0.106846	0.03397
45	1.51215	1.14243	0.106636	0.0328531
45.3333	1.51022	1.15912	0.108288	0.0354022
45.6667	1.52666	1.15578	0.110882	0.0346395
46	1.5336	1.15844	0.111313	0.0328824
46.3333	1.54304	1.16005	0.112304	0.0338143
46.6667	1.5618	1.16853	0.114717	0.0335994
47	1.58752	1.16894	0.119349	0.0344972
47.3333	1.57107	1.1746	0.116347	0.0347987
47.6667	1.57769	1.16881	0.116076	0.0345293
48	1.58767	1.16986	0.118139	0.03552
48.3333	1.60873	1.17409	0.120904	0.0349612
48.6667	1.62791	1.1786	0.12333	0.0343147
49	1.63772	1.17808	0.123391	0.0343367
49.3333	1.63542	1.18223	0.120313	0.0346619
49.6667	1.65589	1.18791	0.123445	0.0343642
50	1.64685	1.19982	0.1208	0.0349163
50.3333	1.64729	1.19623	0.12028	0.0347241
50.6667	1.65899	1.21345	0.121233	0.035338
51	1.6699	1.20199	0.124112	0.035703
51.3333	1.67652	1.20213	0.124656	0.035442
51.6667	1.66951	1.2043	0.122222	0.0345585
52	1.68656	1.20096	0.125839	0.0356848
52.3333	1.69361	1.2036	0.126769	0.03498
52.6667	1.70158	1.21488	0.126166	0.0362272
53	1.72506	1.21014	0.126288	0.0364105
53.3333	1.71964	1.20499	0.125872	0.0361069
53.6667	1.7427	1.2225	0.130829	0.03697
54	1.73205	1.22373	0.129246	0.0383651
54.3333	1.73147	1.22965	0.124992	0.0356965
54.6667	1.73769	1.23709	0.125948	0.0388278
55	1.72953	1.22863	0.124177	0.0369177
55.3333	1.74909	1.23469	0.127086	0.0377105
55.6667	1.75925	1.22286	0.127667	0.0359066
56	1.76586	1.2331	0.126655	0.0376336
56.3333	1.77001	1.24125	0.126531	0.0383288
56.6667	1.78666	1.23487	0.129208	0.0368225
57	1.78893	1.2217	0.126473	0.0357892
57.3333	1.78336	1.21771	0.1232	0.0369142
57.6667	1.78337	1.23998	0.125827	0.0378623
58	1.79115	1.23153	0.12551	0.038268
58.3333	1.80115	1.23616	0.129437	0.0379791
58.6667	1.80262	1.23965	0.127198	0.038339
59	1.78976	1.24356	0.125599	0.0390926
59.3333	1.81042	1.23854	0.127132	0.0386963
59.6667	1.82165	1.21306	0.128683	0.0491492
60	1.82643	1.24904	0.12697	0.0389706
60.3333	1.8232	1.2342	0.128405	0.0383358
60.6667	1.82921	1.2379	0.125748	0.0380531
61	1.83701	1.24391	0.127439	0.0392691
61.3333	1.83994	1.24191	0.125953	0.039035
61.6667	1.84064	1.24423	0.124443	0.0382646
62	1.82076	1.25724	0.123848	0.0402458
62.3333	1.85024	1.28885	0.128103	0.0490707
62.6667	1.84699	1.25239	0.126607	0.0384468
63	1.85753	1.25215	0.128872	0.0374609
63.3333	1.86711	1.25194	0.128531	0.0397148
63.6667	1.86035	1.251	0.126522	0.0391275
64	1.87351	1.24346	0.1283	0.0384531
64.3333	1.86765	1.24669	0.130213	0.0387986
64.6667	1.87274	1.24354	0.130869	0.0391949
65	1.88909	1.23645	0.137972	0.0382624

## Sheet: Source data Figure 5-S-2 D
Source data for Figure 5-figure supplement 2 D
F/F0 (EGFP-GRAM1b) (Left)												Dot Plot (Right)
	Average					SEM						Individual Values
Time (min)	TKO	TKO + mRuby-GRAMD1b	TKO + mRuby-OSBP	TKO + mRuby-ORP4	TKO + mRuby-ORP9	TKO	TKO + mRuby-GRAMD1b	TKO + mRuby-OSBP	TKO + mRuby-ORP4	TKO + mRuby-ORP9		TKO	TKO + mRuby-GRAMD1b	TKO + mRuby-OSBP	TKO + mRuby-ORP4	TKO + mRuby-ORP9
0	1.01142	1.0149	0.971815	0.991244	0.985228	0.0136634	0.00569497	0.0036128	0.00804371	0.00489809		0.816112	0.712378	0.536234	0.797483	1.05768
0.333333	1.00557	1.01581	0.975948	0.992098	0.989137	0.0124781	0.00494508	0.00396396	0.00676509	0.00484045		0.812912	0.440698	1.18093	0.672456	1.16016
0.666667	0.996715	1.01557	0.976948	0.992962	0.990962	0.0117981	0.00468959	0.00338373	0.00615202	0.00478585		1.38951	1.10058	0.645402	0.69149	1.28019
1	0.9941	1.01925	0.980333	0.993381	0.995529	0.00921286	0.00563288	0.00299471	0.0056136	0.00472207		1.60316	0.496219	0.913586	1.0438	0.828328
1.33333	0.993222	1.01423	0.979204	0.993242	0.991617	0.00625386	0.00286111	0.00285888	0.00444065	0.00414666		0.646435	0.943769	0.764589	1.25426	0.654792
1.66667	0.99045	1.01087	0.98355	0.994467	0.992796	0.00359975	0.00266476	0.00271734	0.00360733	0.00299809		0.8317	0.811429	0.646748	0.635131	1.24739
2	0.982629	1.01507	0.987675	0.996251	0.995683	0.00227471	0.00268652	0.00244402	0.00303194	0.0028385		0.735053	1.17365	0.460069	1.26521	1.13246
2.33333	0.979867	1.01442	0.995852	0.995521	0.99337	0.00270597	0.00196568	0.00226475	0.00263561	0.00254149		1.9619	0.413458	1.32395	0.982725	0.940065
2.66667	0.978027	1.01447	0.99523	0.997037	0.996259	0.00402824	0.00344887	0.00150731	0.00203595	0.00220392		0.875789	0.341327	1.00576	0.846958	1.48081
3	0.980703	1.01414	0.99502	1.00038	0.995172	0.00383016	0.00261336	0.00116227	0.00177672	0.00235458		1.05707	0.663032	0.982075	0.609489	1.18476
3.33333	0.983808	1.01015	0.997208	1.00042	1.00227	0.00398465	0.00220257	0.00116743	0.0015793	0.00110727		1.14115	0.618129	0.515776	0.837311	0.602087
3.66667	1.00332	0.999101	1.00152	1.00124	1.00235	0.00194812	0.00144819	0.00141036	0.00100281	0.00183081		0.749229	0.457124	0.816648	0.588116	0.80841
4	1.01923	0.995668	1.00143	0.999745	1.00165	0.0069495	0.00111247	0.000997981	0.00177203	0.00117956		0.720885	0.794511	0.670769	1.15308	0.617605
4.33333	1.01435	0.983844	1.00316	1.00142	0.999039	0.00232475	0.00260967	0.00112997	0.00159738	0.00168931		0.701487	0.577219	0.455009	1.10895	0.702952
4.66667	1.02337	0.982626	1.00643	0.999758	1.00325	0.00402728	0.00391169	0.00193695	0.00314501	0.0021084		0.842565	0.674842	0.805461	1.39669	0.390539
5	1.05277	0.986934	1.01988	1.01576	1.01628	0.0238099	0.0049913	0.00582422	0.00532653	0.0100747		0.857474	0.546623	0.914813	1.2335	0.653697
5.33333	1.04783	0.988944	1.02869	1.01761	1.01579	0.0198799	0.00435869	0.00654718	0.00483059	0.00928492		1.35048	0.460726	0.4643	0.85358	0.484229
5.66667	1.04014	0.998551	1.04176	1.02388	1.02204	0.0196982	0.00545995	0.0109683	0.00630311	0.00638913		1.58356	0.417256	0.772998	0.819283	0.579683
6	1.05218	1.0053	1.04418	1.03409	1.033	0.0204432	0.00638742	0.0128161	0.00830661	0.007326		1.23738	0.000144	0.841677	0.512346	0.395027
6.33333	1.05739	1.00904	1.04412	1.0373	1.04454	0.0212854	0.00714581	0.0145762	0.0102714	0.00896307		0.505827	0.05957	1.30488	0.248198	0.287389
6.66667	1.0652	1.00934	1.04758	1.04153	1.05067	0.0217213	0.00798751	0.0150824	0.0110685	0.00929613		0.532746	0.111544	0.721635	1.51086	0.421431
7	1.07097	1.00481	1.05546	1.0487	1.05426	0.0216631	0.00823333	0.0171211	0.0121662	0.0106468		1.2503	0.043491	0.93159	0.460913	0.263639
7.33333	1.07256	1.0088	1.05928	1.05332	1.06181	0.021902	0.00757815	0.0183542	0.0127154	0.0115499		1.34082	0.149449	0.971362		0.370187
7.66667	1.07905	1.01301	1.06024	1.05731	1.06307	0.0217072	0.00753715	0.0186465	0.0131945	0.0124748		1.16143	0.159939	1.29615
8	1.07633	1.01072	1.05787	1.05925	1.06655	0.0218828	0.00804212	0.0200045	0.0129506	0.012823		1.55399	0.27692
8.33333	1.0729	1.0066	1.06291	1.06043	1.06767	0.0210631	0.00841935	0.0188356	0.0135856	0.0129696		0.71625	0.19102
8.66667	1.07173	1.01443	1.0675	1.06475	1.07458	0.0213917	0.00890123	0.0197662	0.0143478	0.0128956		0.641926	0.446573
9	1.06897	1.00818	1.07196	1.07039	1.07446	0.0209405	0.00907912	0.0202946	0.0152792	0.013151
9.33333	1.06755	1.00428	1.0721	1.07023	1.07361	0.0213501	0.00934567	0.0198873	0.0158892	0.0136445
9.66667	1.05975	1.00672	1.07896	1.07043	1.07017	0.0212689	0.00908815	0.0202052	0.0155222	0.014335
10	1.05455	1.01146	1.08976	1.07576	1.08049	0.0208655	0.00911666	0.0207045	0.016567	0.0150858
10.3333	1.04691	1.01507	1.09304	1.09364	1.07509	0.0206398	0.0104355	0.0200827	0.0221879	0.0156388
10.6667	1.04355	1.01124	1.09865	1.11024	1.07103	0.0197634	0.0102474	0.019975	0.031329	0.0153152
11	1.03542	1.00964	1.09899	1.13228	1.07237	0.0197173	0.0101486	0.0194012	0.0401173	0.015808
11.3333	1.02283	1.0132	1.10088	1.14192	1.07383	0.0207909	0.0105036	0.0190337	0.0460672	0.0160688
11.6667	1.01811	1.01351	1.11173	1.14904	1.07527	0.0208654	0.0105462	0.0207851	0.0474434	0.0156355
12	1.01931	1.01015	1.11776	1.15999	1.0771	0.0204273	0.010754	0.0221066	0.046839	0.0151828
12.3333	1.0176	1.01067	1.12997	1.17736	1.07792	0.0206316	0.0108044	0.0249589	0.0460184	0.0153986
12.6667	1.01616	1.00511	1.14171	1.19232	1.07499	0.0208523	0.0108651	0.0282128	0.0460241	0.0148407
13	1.01378	1.0108	1.15337	1.20268	1.07493	0.0209507	0.0115165	0.0307032	0.0462304	0.0151534
13.3333	1.01379	1.01161	1.16318	1.21411	1.07632	0.0211485	0.0116725	0.0317793	0.0465891	0.0146244
13.6667	1.01498	1.01329	1.16914	1.22603	1.07799	0.0214272	0.0119349	0.0326035	0.0461856	0.015353
14	1.02071	1.01778	1.17601	1.23871	1.08492	0.021716	0.0122917	0.0338026	0.0457043	0.0152579
14.3333	1.01952	1.01532	1.17878	1.25039	1.08758	0.0220482	0.0133712	0.0337631	0.047322	0.0153175
14.6667	1.02628	1.01473	1.18384	1.26328	1.09474	0.0228361	0.0133354	0.0343133	0.0483832	0.016648
15	1.0274	1.01326	1.19281	1.2787	1.09777	0.0230708	0.0133475	0.0347212	0.0480063	0.0183701
15.3333	1.03134	1.01542	1.20281	1.28592	1.10629	0.0243503	0.0140812	0.0346695	0.0487368	0.021349
15.6667	1.03878	1.02174	1.21317	1.2995	1.11992	0.0254501	0.0145107	0.0349703	0.0490099	0.026215
16	1.04493	1.02243	1.224	1.30665	1.1415	0.0267657	0.0148261	0.0351456	0.048518	0.0312085
16.3333	1.05046	1.02757	1.23545	1.3103	1.16634	0.0275896	0.0161142	0.0353659	0.0476504	0.0380459
16.6667	1.06625	1.02721	1.24618	1.31708	1.20039	0.0303354	0.0166119	0.036446	0.0483253	0.0458369
17	1.07403	1.03373	1.25932	1.32849	1.22122	0.0319056	0.0180633	0.0373205	0.0483692	0.0496697
17.3333	1.08199	1.03762	1.26645	1.34161	1.24183	0.0334782	0.0201407	0.0370609	0.0496121	0.054137
17.6667	1.09292	1.04445	1.27381	1.36124	1.26126	0.0350696	0.0219376	0.0376137	0.0491069	0.0567699
18	1.10509	1.04441	1.28609	1.37413	1.28446	0.0369536	0.0225122	0.038501	0.049639	0.0591227
18.3333	1.10955	1.04152	1.2984	1.38707	1.29381	0.0380876	0.0231542	0.0388801	0.0516438	0.0607758
18.6667	1.1192	1.04459	1.30974	1.401	1.30274	0.0396017	0.0239516	0.0399431	0.0514052	0.0618494
19	1.13153	1.05093	1.31972	1.40797	1.3099	0.0436409	0.02525	0.0407069	0.0518913	0.0636367
19.3333	1.1429	1.05749	1.33281	1.413	1.31972	0.0480789	0.0270465	0.0415521	0.0516129	0.064656
19.6667	1.15697	1.06939	1.34356	1.41858	1.33193	0.0535835	0.0293749	0.0419476	0.0511202	0.065664
20	1.16414	1.06644	1.35528	1.43764	1.33813	0.0578623	0.0303552	0.044357	0.0529156	0.0658992
20.3333	1.18349	1.07529	1.36318	1.44614	1.34694	0.0607606	0.0311802	0.0446441	0.0536974	0.0671671
20.6667	1.21283	1.0793	1.37191	1.45509	1.35958	0.0629267	0.0325785	0.0456779	0.0547367	0.0684384
21	1.18	1.08576	1.38783	1.46784	1.3687	0.0613778	0.0336984	0.0465166	0.0565121	0.0690805
21.3333	1.18486	1.0864	1.39709	1.47817	1.37068	0.0617009	0.0337091	0.0475695	0.0579488	0.0692089
21.6667	1.1774	1.08938	1.41019	1.48218	1.386	0.0609934	0.0346781	0.0494	0.0586812	0.0746497
22	1.17974	1.09347	1.41449	1.48932	1.39051	0.0611745	0.0353796	0.0512603	0.0595211	0.0713896
22.3333	1.17266	1.09517	1.42342	1.49714	1.3953	0.0615821	0.0359212	0.0522966	0.0602816	0.0712513
22.6667	1.18284	1.09719	1.42601	1.50985	1.39518	0.0594134	0.0365331	0.0528946	0.0608553	0.0710663
23	1.18705	1.09375	1.43619	1.51782	1.3633	0.0590131	0.0354665	0.0545886	0.0614141	0.0703449
23.3333	1.19155	1.09119	1.43938	1.51952	1.45393	0.0588751	0.036044	0.055249	0.0609809	0.072553
23.6667	1.19025	1.09729	1.44485	1.5273	1.39774	0.0592135	0.0371295	0.0558386	0.0609034	0.0747474
24	1.18853	1.10272	1.45131	1.53248	1.38479	0.0566398	0.0375304	0.0565408	0.0596741	0.0766784
24.3333	1.19446	1.10153	1.45573	1.5367	1.40692	0.0559209	0.0374031	0.0565839	0.0603084	0.0714434
24.6667	1.19499	1.1043	1.46232	1.54118	1.41892	0.0554878	0.0387321	0.0566008	0.061006	0.0728935
25	1.20085	1.11184	1.46225	1.54313	1.42531	0.0541951	0.0389593	0.056554	0.0619988	0.0724887
25.3333	1.2014	1.11629	1.46194	1.55062	1.4299	0.0538932	0.0401079	0.0571837	0.0607878	0.0726242
25.6667	1.20596	1.11487	1.46534	1.55408	1.42562	0.0532409	0.0404361	0.0571552	0.060345	0.0717041
26	1.21783	1.11789	1.46673	1.55389	1.43273	0.052723	0.0405443	0.058005	0.0608166	0.0712007
26.3333	1.22407	1.12231	1.46852	1.55767	1.43063	0.052651	0.0402292	0.0573515	0.0614189	0.0756883
26.6667	1.25155	1.12442	1.47356	1.56192	1.43581	0.0521831	0.0407632	0.0583546	0.0607875	0.0711899
27	1.24694	1.12738	1.47568	1.57399	1.44562	0.0542031	0.0413824	0.058353	0.0620593	0.0709587
27.3333	1.26455	1.12821	1.47757	1.58299	1.45605	0.052526	0.0417109	0.0585448	0.0612472	0.070844
27.6667	1.27943	1.12767	1.47991	1.58929	1.4555	0.0534953	0.0420621	0.0590714	0.061953	0.0697592
28	1.27693	1.13246	1.48523	1.59243	1.45259	0.0574806	0.0421411	0.0589146	0.0608913	0.0676305
28.3333	1.28483	1.13778	1.48615	1.59495	1.45472	0.0593271	0.041855	0.0582143	0.061036	0.0691851
28.6667	1.30874	1.1408	1.49085	1.60898	1.46326	0.0596981	0.0419238	0.0589505	0.0611457	0.0694534
29	1.32622	1.14233	1.49234	1.61213	1.43034	0.0583528	0.0423323	0.0586817	0.0603031	0.0698661
29.3333	1.34416	1.14808	1.49252	1.61529	1.46081	0.0591052	0.041874	0.0580614	0.0603276	0.0674742
29.6667	1.35373	1.14953	1.48942	1.61775	1.46074	0.0596399	0.0416133	0.0584642	0.0611792	0.0669397
30	1.37605	1.14985	1.4998	1.61877	1.46404	0.061338	0.042129	0.0588083	0.0617162	0.0663076
30.3333	1.40006	1.15424	1.49971	1.62658	1.45226	0.0627443	0.04222	0.0588615	0.0621244	0.0582064
30.6667	1.41337	1.15231	1.50266	1.62949	1.47562	0.0644977	0.0420517	0.0588727	0.0619802	0.066597
31	1.43484	1.15322	1.50126	1.62987	1.47737	0.0645305	0.0416361	0.0589605	0.0616383	0.0670386
31.3333	1.4468	1.1569	1.50926	1.6357	1.47667	0.0658746	0.0416636	0.0589507	0.0621732	0.0661422
31.6667	1.46181	1.16588	1.51376	1.64936	1.46611	0.0669869	0.0406824	0.0596842	0.0614013	0.0610258
32	1.47421	1.16251	1.51856	1.64991	1.48989	0.0677903	0.0406643	0.059153	0.0609361	0.0665581
32.3333	1.4864	1.16217	1.52218	1.64864	1.49055	0.0687403	0.0404724	0.059105	0.0611923	0.066747
32.6667	1.49897	1.16801	1.52237	1.65311	1.49343	0.0707732	0.0400963	0.0592524	0.0605071	0.0670102
33	1.50656	1.17295	1.52941	1.66221	1.49043	0.0707406	0.0398173	0.0597717	0.0596492	0.0665964
33.3333	1.51313	1.1747	1.52392	1.66685	1.50121	0.0719494	0.0402539	0.0582652	0.0595282	0.0661271
33.6667	1.51202	1.17362	1.52512	1.66953	1.50507	0.0713435	0.0402008	0.0581535	0.0600665	0.0654759
34	1.5221	1.17567	1.52401	1.67629	1.50837	0.0720825	0.0404047	0.0576588	0.0589885	0.0651939
34.3333	1.52827	1.17967	1.52557	1.68283	1.51615	0.0720032	0.0400503	0.0577706	0.0592882	0.0652715
34.6667	1.53337	1.18532	1.53428	1.68582	1.52248	0.0725131	0.0397844	0.0591448	0.0597161	0.0650159
35	1.53354	1.18631	1.52872	1.69188	1.53053	0.072654	0.0395307	0.0573106	0.0591121	0.0657457
35.3333	1.53735	1.19129	1.53192	1.69557	1.54078	0.0722593	0.0394205	0.0570743	0.0593164	0.0649177
35.6667	1.54482	1.19701	1.53374	1.69275	1.54508	0.0727041	0.0392968	0.0568418	0.0589923	0.0655959
36	1.55349	1.19481	1.53543	1.69581	1.551	0.0723356	0.0389305	0.0570572	0.0588053	0.0661038
36.3333	1.55564	1.20412	1.54245	1.70489	1.54685	0.0722005	0.039335	0.0577957	0.0581445	0.0658665
36.6667	1.55982	1.19741	1.54026	1.70682	1.54632	0.0722922	0.0393899	0.0568387	0.0574601	0.0658303
37	1.56163	1.2059	1.53906	1.70727	1.55808	0.0725053	0.0394051	0.05666	0.0570856	0.0666833
37.3333	1.56504	1.20075	1.54496	1.70639	1.55899	0.0719924	0.039585	0.0574188	0.0567872	0.0674166
37.6667	1.56706	1.2081	1.54914	1.71594	1.5647	0.0722955	0.03852	0.0577273	0.0579256	0.0671237
38	1.57144	1.2183	1.55919	1.71688	1.57016	0.0728189	0.0386874	0.0585982	0.0577611	0.067554
38.3333	1.58131	1.22403	1.5566	1.72319	1.57818	0.0724435	0.03863	0.0580637	0.0585242	0.0691877
38.6667	1.58475	1.22485	1.55993	1.72519	1.58209	0.0723972	0.0381408	0.0582999	0.0573267	0.0688289
39	1.59278	1.23677	1.56725	1.72893	1.59269	0.0725071	0.0383521	0.0584321	0.056676	0.0699606
39.3333	1.60117	1.23376	1.57378	1.72785	1.59171	0.0731793	0.0389983	0.0593064	0.054602	0.0695678
39.6667	1.59767	1.23544	1.57213	1.73222	1.59241	0.0731291	0.038846	0.059607	0.0547039	0.0698826
40	1.60337	1.24948	1.56915	1.73794	1.59264	0.0734521	0.0394789	0.0587887	0.054316	0.0692916
40.3333	1.61168	1.25204	1.56743	1.7418	1.59095	0.0737426	0.039341	0.0585317	0.0546242	0.0689252
40.6667	1.62123	1.25431	1.57405	1.74094	1.59108	0.0736292	0.0398599	0.0586936	0.0542668	0.0690409
41	1.63584	1.25538	1.57681	1.74797	1.60416	0.0744619	0.0400832	0.0588589	0.0532439	0.0697721
41.3333	1.64507	1.26543	1.57309	1.75179	1.60336	0.0729963	0.0399346	0.0581356	0.0534795	0.0698279
41.6667	1.66641	1.26496	1.57506	1.75954	1.60933	0.0744889	0.0394178	0.0572156	0.0549406	0.0702809
42	1.68404	1.26932	1.57923	1.76899	1.6028	0.0748455	0.0398344	0.0586636	0.0536632	0.06879
42.3333	1.6877	1.27283	1.58649	1.76765	1.60784	0.075015	0.0392796	0.0589713	0.0533872	0.0692498
42.6667	1.70348	1.27515	1.5894	1.7692	1.60984	0.0754813	0.0394008	0.0585467	0.0535369	0.0694591
43	1.71373	1.27964	1.5891	1.77068	1.61254	0.0763147	0.039192	0.0581207	0.0540693	0.0700085
43.3333	1.73166	1.28145	1.58981	1.77242	1.62379	0.0754312	0.0396696	0.0578458	0.0538326	0.0707939
43.6667	1.742	1.28298	1.59137	1.77367	1.62599	0.0756318	0.0400289	0.0587378	0.0540437	0.0714263
44	1.7497	1.28761	1.58919	1.77693	1.62516	0.0761335	0.0388214	0.0585021	0.0541468	0.070989
44.3333	1.76237	1.29635	1.58565	1.78976	1.63042	0.0760186	0.0398797	0.0586054	0.0549881	0.0716852
44.6667	1.77114	1.30373	1.59245	1.79246	1.62763	0.0763631	0.0402226	0.0586944	0.0553898	0.0713095
45	1.78059	1.30825	1.60595	1.79819	1.62638	0.0763322	0.040256	0.0598107	0.0552303	0.0715841
45.3333	1.77568	1.30425	1.59827	1.80687	1.62393	0.0756267	0.0404422	0.0587823	0.0549986	0.0711876
45.6667	1.78433	1.30094	1.5966	1.80894	1.62933	0.0758055	0.039837	0.0592394	0.0553458	0.0710096
46	1.78919	1.31406	1.59237	1.80896	1.63188	0.0753478	0.0406157	0.0584752	0.0552991	0.0711582
46.3333	1.79397	1.32108	1.59588	1.8099	1.63416	0.0750693	0.0400992	0.0584574	0.0555976	0.071746
46.6667	1.81259	1.32543	1.60401	1.80804	1.64304	0.0757598	0.0407725	0.0592962	0.055241	0.0726741
47	1.82114	1.33031	1.61197	1.81388	1.64674	0.0759344	0.0412269	0.0590475	0.0553702	0.0732093
47.3333	1.8327	1.33711	1.62044	1.81356	1.65076	0.0759068	0.0413876	0.0601617	0.0553766	0.0728667
47.6667	1.83369	1.33972	1.62932	1.81654	1.64814	0.0753627	0.0408738	0.0592602	0.0551141	0.0721557
48	1.85075	1.34269	1.63071	1.8194	1.65123	0.0760503	0.0415862	0.0592818	0.0558498	0.0729332
48.3333	1.87012	1.35106	1.63591	1.82189	1.65486	0.0755883	0.0426021	0.0594871	0.0561525	0.0731855
48.6667	1.88562	1.34592	1.63369	1.82705	1.65836	0.0760198	0.0411578	0.059077	0.0560895	0.0731996
49	1.89051	1.36099	1.63164	1.83235	1.66675	0.0756465	0.0424259	0.0590224	0.0565682	0.073279
49.3333	1.88854	1.36847	1.64222	1.831	1.67539	0.0753142	0.0421526	0.0600905	0.0564952	0.0753096
49.6667	1.8924	1.37986	1.64309	1.83882	1.67601	0.0750788	0.0431169	0.0599655	0.0567342	0.0745847
50	1.89931	1.38518	1.6576	1.8431	1.67944	0.0751804	0.0437425	0.0606858	0.056823	0.0742521
50.3333	1.91342	1.38953	1.661	1.84006	1.6854	0.0747705	0.0433864	0.0599999	0.0566302	0.075875
50.6667	1.92402	1.3932	1.66381	1.8415	1.68716	0.0757525	0.0438179	0.0597155	0.0576013	0.0764806
51	1.92274	1.39068	1.66203	1.84313	1.68001	0.0742401	0.0433086	0.0596955	0.0572141	0.0746755
51.3333	1.92481	1.39739	1.66849	1.84294	1.68562	0.0743881	0.0434039	0.0589321	0.0568794	0.0744095
51.6667	1.91608	1.3984	1.67604	1.84466	1.68389	0.0732276	0.0437048	0.0601711	0.0569677	0.0733007
52	1.91789	1.40351	1.68034	1.8497	1.68263	0.0727153	0.0443447	0.0591586	0.0571114	0.0723535
52.3333	1.9408	1.41303	1.68699	1.84613	1.68209	0.0741009	0.0451283	0.0598481	0.056931	0.0729177
52.6667	1.94356	1.41183	1.69255	1.85365	1.68772	0.0731634	0.044705	0.0596667	0.0571398	0.0728113
53	1.95178	1.41895	1.69967	1.85657	1.6863	0.0729072	0.0453398	0.0596748	0.0577686	0.0724451
53.3333	1.94562	1.41462	1.70911	1.85978	1.68586	0.0727481	0.0450152	0.0602343	0.0580402	0.0724309
53.6667	1.95006	1.41468	1.71236	1.86258	1.68578	0.0730434	0.0446079	0.0599146	0.0579885	0.0724607
54	1.95361	1.42356	1.71468	1.85127	1.68662	0.0725523	0.0455407	0.0595752	0.0573824	0.0713104
54.3333	1.95572	1.43605	1.71068	1.86883	1.70172	0.0724859	0.0464083	0.057805	0.0583262	0.0725419
54.6667	1.95727	1.44998	1.70705	1.85526	1.69916	0.072203	0.048107	0.0574244	0.0577431	0.0710617
55	1.95625	1.46539	1.71086	1.85731	1.69931	0.0721222	0.0501142	0.0562212	0.0587894	0.070493
55.3333	1.95924	1.46018	1.72512	1.85856	1.70513	0.0716503	0.0494808	0.0574382	0.0584968	0.0712551
55.6667	1.962	1.4645	1.72539	1.85751	1.70856	0.071914	0.0501959	0.0572955	0.0581181	0.0711806
56	1.96918	1.46658	1.74159	1.86369	1.7069	0.0726463	0.0499557	0.0581565	0.0591512	0.0709555
56.3333	1.96619	1.4654	1.74058	1.85784	1.70656	0.0733759	0.0499078	0.0579794	0.0588164	0.0709654
56.6667	1.96814	1.46623	1.73644	1.85822	1.71303	0.0723252	0.050799	0.0580516	0.0591041	0.0713089
57	1.96202	1.47404	1.72698	1.84028	1.7141	0.0731326	0.0517675	0.0571718	0.0564249	0.0715068
57.3333	1.96875	1.47381	1.73077	1.8502	1.71496	0.0734985	0.051475	0.0570087	0.0598011	0.0706625
57.6667	1.97068	1.47342	1.74238	1.85527	1.72467	0.0718756	0.0511611	0.0577528	0.0598687	0.0712448
58	1.96968	1.48624	1.73947	1.85449	1.72789	0.0720277	0.0519334	0.057546	0.0606105	0.0716026
58.3333	1.96618	1.48595	1.74772	1.85654	1.72256	0.0703452	0.0511649	0.057093	0.0598307	0.0718919
58.6667	1.96091	1.49478	1.75719	1.85874	1.72833	0.0705518	0.0524599	0.057954	0.0599451	0.0715166
59	1.96448	1.48892	1.76025	1.86023	1.74118	0.0705371	0.0527116	0.0568277	0.0605466	0.0721738
59.3333	1.96154	1.48886	1.76555	1.86389	1.74416	0.07085	0.0528384	0.0583061	0.0604599	0.0721838
59.6667	1.95285	1.48809	1.77054	1.86405	1.74465	0.0701925	0.0523192	0.058861	0.0610565	0.0721132
60	1.95297	1.49403	1.77233	1.86267	1.7478	0.0693599	0.0535194	0.0585966	0.0611966	0.0726283
60.3333	1.94562	1.49227	1.77827	1.86752	1.75532	0.0690834	0.0540023	0.0593076	0.061028	0.0721234
60.6667	1.94757	1.48272	1.77865	1.8689	1.75005	0.0698208	0.0547109	0.0585636	0.0618753	0.0718906
61	1.94829	1.48588	1.78494	1.8647	1.7526	0.0696977	0.0546328	0.0589874	0.0625865	0.0723449
61.3333	1.94874	1.48416	1.78743	1.86796	1.75147	0.0685422	0.0553395	0.0593356	0.0621555	0.0725508
61.6667	1.95429	1.48846	1.78173	1.86645	1.75169	0.0695143	0.0554456	0.0584345	0.0620276	0.0723358
62	1.95139	1.49161	1.77313	1.86672	1.75253	0.0688654	0.0551263	0.0577746	0.0629808	0.0723428
62.3333	1.95357	1.4965	1.77018	1.86902	1.76152	0.0694439	0.0563845	0.058436	0.0633488	0.0725451
62.6667	1.95718	1.4961	1.77939	1.8722	1.75882	0.069146	0.0556971	0.0593871	0.064232	0.0722257
63	1.96708	1.49354	1.77957	1.87312	1.76963	0.0704246	0.0557745	0.0589412	0.0644514	0.073508
63.3333	1.96761	1.4938	1.79135	1.87426	1.77625	0.0697094	0.0568939	0.0602715	0.0643607	0.0754488
63.6667	1.99778	1.48904	1.80445	1.87076	1.77424	0.0722718	0.0574072	0.0604479	0.0640091	0.075254
64	2.01372	1.48802	1.8062	1.87822	1.76594	0.0716644	0.0578271	0.0605097	0.0656865	0.0744731
64.3333	2.01515	1.48062	1.80443	1.8827	1.76062	0.0714588	0.0579149	0.0614947	0.0664568	0.0740255
64.6667	2.02055	1.4845	1.79634	1.87782	1.75963	0.0715121	0.059134	0.0613904	0.0662248	0.072953
65	2.02286	1.4845	1.83093	1.88736	1.76276	0.071582	0.059134	0.0529981	0.0683722	0.0730163

## Sheet: Source data Figure 5-S-2 E
Source data for Figure 5-figure supplement 2 E
F/F0 (mRuby) (Left)										Dot Plot (Right)
	Average				SEM					Individual Values
Time (min)	TKO + mRuby-GRAMD1b	TKO + mRuby-OSBP	TKO + mRuby-ORP4	TKO + mRuby-ORP9	TKO + mRuby-GRAMD1b	TKO + mRuby-OSBP	TKO + mRuby-ORP4	TKO + mRuby-ORP9		TKO + mRuby-GRAMD1b	TKO + mRuby-OSBP	TKO + mRuby-ORP4	TKO + mRuby-ORP9
0	1.11248	0.995964	0.994084	0.97029	0.0146765	0.00980169	0.00788733	0.0071574		2.41271	0.217949	-0.044136	0.415241
0.333333	1.10195	0.99881	0.995986	0.972313	0.0127147	0.00951394	0.00692463	0.00742519		-0.367064	0.212477	0.020308	0.36362
0.666667	1.0942	0.99192	0.998725	0.97961	0.013166	0.00690422	0.00597969	0.00725746		0.887645	1.12526	-0.063195	0.180918
1	1.09168	0.9905	0.99919	0.979545	0.0142696	0.00643099	0.00463864	0.00429567		0.625116	0.540571	0.619783	0.230023
1.33333	1.06702	0.997745	0.996191	0.982117	0.0135633	0.00505794	0.00549192	0.00442352		2.30681	0.433475	0.609448	0.043925
1.66667	1.04552	1.0009	0.996263	0.986804	0.0105225	0.00476993	0.00524793	0.00487156		3.21338	0.444287	0.085836	0.154181
2	1.04654	1.0024	0.994144	0.983103	0.0125502	0.00388424	0.00523183	0.00491371		0.951229	0.331031	0.233991	0.152686
2.33333	1.02196	0.997932	0.993184	0.978762	0.00917129	0.00295488	0.00391456	0.00301551		0.112453	0.327035	0.225618	0.124957
2.66667	1.00684	0.999004	0.993548	0.978706	0.00512812	0.00307514	0.00237401	0.00459804		0.219885	0.337892	0.035435	0.46327
3	1.00654	0.999904	0.998147	0.984035	0.00346862	0.00252894	0.00207656	0.00463785		0.371273	0.190814	0.398798	0.345837
3.33333	1.01118	1.00025	1.00081	0.9963	0.00329182	0.00139372	0.00178595	0.00138484		-0.099302	0.730431	-0.098347	0.290073
3.66667	1.0046	0.999302	1.00243	0.999384	0.00490523	0.00161841	0.00171476	0.00188674		-0.006288	0.290854	-0.222898	-0.093622
4	0.996209	0.999439	1.0025	1.00916	0.00548181	0.00153269	0.00155081	0.00223107		0.39406	0.230413	0.297894	-0.139204
4.33333	0.986641	1.00189	1.00279	1.01293	0.00371376	0.00170409	0.0017159	0.00262537		0.274973	0.004405	0.100376	-0.024664
4.66667	0.987992	1.0002	0.999775	1.01949	0.0057261	0.00305703	0.00268016	0.00353076		1.43381	-0.015725	0.28204	-0.029968
5	0.959858	0.989962	0.984881	0.99904	0.011227	0.0059372	0.005008	0.0173838		2.52326	0.361085	0.42428	0.194241
5.33333	0.982541	1.0139	0.991225	1.03736	0.0119891	0.00540639	0.00710133	0.0155664		0.601158	0.089191	0.024837	0.458001
5.66667	0.998211	1.03188	1.00933	1.05779	0.0142772	0.00854763	0.010422	0.014667		0.374989	0.06185	0.363545	0.511923
6	1.00271	1.05203	1.0205	1.0793	0.0162309	0.0111199	0.0150062	0.0150254		0.640187	0.078857	0.18738	0.19541
6.33333	1.01001	1.06566	1.03814	1.0867	0.0181386	0.0140727	0.0165952	0.0150968		0.301702	0.311171	-0.119312	0.088884
6.66667	1.00942	1.07731	1.04822	1.09546	0.0206137	0.015511	0.0193188	0.0158676		0.288306	0.134872	0.048248	0.279237
7	1.01372	1.07906	1.04442	1.09692	0.0238115	0.0156624	0.0193506	0.0151614		0.31257	0.374355	0.020883	0.227502
7.33333	1.00859	1.082	1.04743	1.10455	0.0252021	0.0167158	0.0196922	0.0161495		-0.313818	0.229531		0.417434
7.66667	0.99632	1.08668	1.05026	1.10369	0.0271743	0.0174801	0.0217592	0.0164864		0.301251	0.400714
8	1.00923	1.09847	1.05182	1.11125	0.0280552	0.0210745	0.0231357	0.0172666		1.04835
8.33333	1.01676	1.09737	1.06279	1.1101	0.0291797	0.0171009	0.0237823	0.0168368		1.54475
8.66667	1.01401	1.10273	1.05807	1.11186	0.0304288	0.0196183	0.0251217	0.0178184		1.38124
9	1.00364	1.09941	1.06315	1.10655	0.0297831	0.0163732	0.0253168	0.0141036
9.33333	1.00932	1.10468	1.07631	1.09107	0.0302052	0.0165228	0.0258432	0.0154735
9.66667	0.99728	1.1054	1.07509	1.08471	0.0325407	0.0164337	0.0265458	0.016876
10	1.00744	1.10685	1.08604	1.10865	0.0336537	0.0162085	0.026121	0.0156786
10.3333	0.99999	1.10342	1.0878	1.09565	0.0345247	0.0156728	0.0244305	0.0147833
10.6667	1.01058	1.09902	1.08321	1.10195	0.0374832	0.0145761	0.0252947	0.0153595
11	1.00572	1.10552	1.08988	1.10029	0.0385611	0.0145839	0.0258047	0.0167687
11.3333	1.01225	1.11227	1.07649	1.11079	0.0380531	0.0144461	0.0240996	0.0145272
11.6667	1.01764	1.12212	1.09647	1.10672	0.0409366	0.0152718	0.0242565	0.0149388
12	1.02488	1.12669	1.09552	1.11063	0.0420101	0.0148894	0.02383	0.0149921
12.3333	1.02338	1.12365	1.10004	1.1151	0.0426564	0.0156144	0.0236942	0.0149364
12.6667	1.03087	1.12293	1.09849	1.12054	0.0450716	0.0164115	0.0246448	0.014336
13	1.04056	1.12762	1.09356	1.12852	0.0461368	0.016043	0.0243574	0.0139401
13.3333	1.03006	1.13608	1.09664	1.12854	0.0464731	0.0175534	0.024206	0.0145223
13.6667	1.03102	1.14152	1.1041	1.13188	0.0473246	0.0195944	0.0256406	0.014897
14	1.0262	1.13984	1.09243	1.12105	0.04797	0.0194562	0.026278	0.0147645
14.3333	1.03007	1.14368	1.09862	1.12886	0.04808	0.0193812	0.025781	0.0144709
14.6667	1.02644	1.14946	1.09798	1.12934	0.0481626	0.0197266	0.0254825	0.0145619
15	1.03696	1.14623	1.10242	1.131	0.0522807	0.0203372	0.0255327	0.0148047
15.3333	1.0321	1.14713	1.09526	1.12748	0.0517535	0.0202202	0.0256805	0.0144793
15.6667	1.04293	1.15083	1.09429	1.12853	0.0517737	0.0209204	0.0240623	0.014459
16	1.04772	1.15036	1.10023	1.12757	0.0546233	0.0204782	0.0252893	0.0138599
16.3333	1.05814	1.15131	1.10234	1.12965	0.055599	0.0205876	0.0254884	0.0142439
16.6667	1.05369	1.14816	1.10236	1.13046	0.05521	0.020567	0.0253629	0.0132267
17	1.05904	1.15105	1.1036	1.13109	0.0564256	0.01997	0.0254124	0.0129629
17.3333	1.06993	1.15065	1.10694	1.12898	0.0578733	0.0199533	0.0250551	0.0130622
17.6667	1.07367	1.15016	1.10122	1.12865	0.0573948	0.0205406	0.0240508	0.0133735
18	1.07356	1.14741	1.10615	1.12996	0.0573583	0.0200362	0.0251285	0.0128278
18.3333	1.08383	1.14818	1.10122	1.13093	0.0599472	0.0199871	0.0246319	0.0133529
18.6667	1.09701	1.14534	1.10171	1.13371	0.0617771	0.0201088	0.0234224	0.0124414
19	1.10747	1.13768	1.10849	1.13882	0.0629106	0.0194079	0.0241632	0.0129009
19.3333	1.12088	1.13482	1.11562	1.13436	0.0647646	0.0191591	0.0239282	0.0124407
19.6667	1.1505	1.13598	1.11364	1.13597	0.0714096	0.0193011	0.0260688	0.0124332
20	1.16117	1.133	1.10508	1.13079	0.0824129	0.0190929	0.0256657	0.0117626
20.3333	1.18861	1.13598	1.10934	1.13703	0.0893992	0.0192063	0.0255885	0.0119633
20.6667	1.197	1.13329	1.10884	1.13961	0.098583	0.019629	0.0263861	0.0119618
21	1.2118	1.13143	1.1139	1.13872	0.108656	0.019158	0.025758	0.0120875
21.3333	1.22778	1.1332	1.11675	1.13228	0.114794	0.0193933	0.0266988	0.0125067
21.6667	1.25523	1.12973	1.1223	1.11293	0.125177	0.0189359	0.0271736	0.0165577
22	1.27101	1.12973	1.12057	1.13516	0.128661	0.0195907	0.0278196	0.0117631
22.3333	1.27894	1.13168	1.11555	1.13199	0.133298	0.0195284	0.0279682	0.0120596
22.6667	1.29172	1.12948	1.11224	1.13949	0.139305	0.0197566	0.027049	0.0118328
23	1.31436	1.12971	1.11177	1.12953	0.146307	0.0200299	0.0262688	0.0125375
23.3333	1.33922	1.13001	1.11394	1.14613	0.153978	0.0201403	0.0276572	0.0141303
23.6667	1.35963	1.12614	1.11004	1.13205	0.161355	0.0199902	0.025908	0.014534
24	1.36282	1.12533	1.116	1.1424	0.164898	0.019712	0.0269404	0.0190016
24.3333	1.37989	1.12314	1.11418	1.13305	0.171883	0.0201448	0.02725	0.011506
24.6667	1.39911	1.13262	1.1214	1.14017	0.179663	0.0202728	0.0266964	0.0120614
25	1.40393	1.13523	1.1252	1.14306	0.180857	0.0204514	0.0267359	0.0118438
25.3333	1.40281	1.13345	1.12532	1.13886	0.184201	0.0205801	0.0270102	0.0116404
25.6667	1.41306	1.13698	1.12546	1.13955	0.185478	0.0212859	0.0273724	0.0119291
26	1.43104	1.13386	1.12885	1.15673	0.191262	0.0212992	0.0273011	0.0136217
26.3333	1.43646	1.13634	1.13246	1.14918	0.197657	0.0212521	0.0280653	0.0110801
26.6667	1.45147	1.13539	1.13721	1.13813	0.200925	0.0213828	0.0279094	0.0121681
27	1.45751	1.13613	1.13611	1.13227	0.20195	0.0211639	0.0278989	0.0120731
27.3333	1.48375	1.1341	1.13347	1.14795	0.209534	0.0218221	0.0279263	0.0124286
27.6667	1.5057	1.13737	1.12615	1.13379	0.215194	0.0218397	0.0278165	0.0130854
28	1.52453	1.13802	1.12552	1.14385	0.223316	0.0216207	0.0277827	0.0143887
28.3333	1.535	1.1361	1.13032	1.1437	0.229593	0.0209405	0.028287	0.0138286
28.6667	1.538	1.13226	1.12008	1.15163	0.231533	0.0212495	0.0286708	0.0134244
29	1.55022	1.12784	1.11886	1.13393	0.234486	0.0214535	0.0270977	0.0188121
29.3333	1.56295	1.13174	1.13006	1.14782	0.239584	0.0230655	0.0294307	0.0152029
29.6667	1.57759	1.1328	1.1246	1.14377	0.239588	0.0239307	0.029091	0.0153848
30	1.57717	1.13064	1.12766	1.14055	0.239081	0.0242797	0.0279956	0.015723
30.3333	1.57807	1.13035	1.12646	1.10859	0.240319	0.0243735	0.0283216	0.0151294
30.6667	1.5825	1.1338	1.13434	1.14617	0.241601	0.0240023	0.0284327	0.0159415
31	1.58898	1.13353	1.1381	1.14613	0.239261	0.0241582	0.0289666	0.0174778
31.3333	1.58945	1.13854	1.13652	1.14309	0.240577	0.0245915	0.0290733	0.0180452
31.6667	1.58077	1.13354	1.12947	1.1371	0.237769	0.0242645	0.0292278	0.0175875
32	1.58279	1.13328	1.13956	1.14607	0.236362	0.0247292	0.028463	0.0192544
32.3333	1.59453	1.13677	1.13207	1.14091	0.237201	0.0246442	0.0289919	0.0191619
32.6667	1.58481	1.13559	1.13499	1.14538	0.232466	0.0246704	0.0284529	0.0196595
33	1.57881	1.13818	1.13608	1.14324	0.232001	0.0251614	0.0287502	0.0191005
33.3333	1.58805	1.14157	1.13327	1.14018	0.233277	0.0251849	0.0296617	0.0205781
33.6667	1.57224	1.14145	1.14163	1.14138	0.225974	0.0257063	0.0289419	0.0211584
34	1.58279	1.14263	1.13561	1.13654	0.228248	0.025582	0.0298913	0.0223176
34.3333	1.57401	1.14481	1.1344	1.13442	0.220587	0.0263506	0.0292638	0.0218338
34.6667	1.57431	1.14421	1.13005	1.137	0.217835	0.0263025	0.0289041	0.0225807
35	1.57353	1.14503	1.13093	1.13296	0.215941	0.0267621	0.0301204	0.0238759
35.3333	1.5721	1.14708	1.12381	1.13982	0.21447	0.0258231	0.0295284	0.0233022
35.6667	1.57315	1.15078	1.13324	1.13597	0.213827	0.0268301	0.0297495	0.024272
36	1.56406	1.15212	1.13612	1.13999	0.210183	0.0270576	0.0312743	0.0237434
36.3333	1.55842	1.15308	1.13435	1.14634	0.204846	0.0271248	0.0295909	0.0235144
36.6667	1.56051	1.15114	1.14153	1.14307	0.20246	0.0269002	0.0310802	0.025725
37	1.56241	1.15927	1.14133	1.13729	0.198148	0.0269177	0.0312748	0.0261979
37.3333	1.5554	1.15685	1.14293	1.14402	0.19616	0.0272688	0.0315772	0.0275212
37.6667	1.56206	1.15663	1.14309	1.14039	0.194524	0.0270772	0.0308183	0.0271712
38	1.56261	1.15692	1.14612	1.14363	0.192435	0.0273552	0.0317684	0.02711
38.3333	1.56269	1.15637	1.14618	1.14073	0.191439	0.0275234	0.0319	0.028934
38.6667	1.56578	1.15804	1.14742	1.14423	0.19009	0.0276679	0.0329778	0.0284059
39	1.55574	1.16007	1.14192	1.14235	0.186116	0.0274998	0.0324956	0.0284371
39.3333	1.5745	1.16024	1.14385	1.14442	0.190547	0.0280287	0.0332454	0.0298471
39.6667	1.57939	1.16528	1.13687	1.14703	0.189031	0.028127	0.03334	0.0300517
40	1.59373	1.16851	1.13995	1.14691	0.19043	0.0285656	0.0332258	0.0291412
40.3333	1.58963	1.16956	1.14056	1.1495	0.191654	0.0277538	0.0330963	0.0288014
40.6667	1.60554	1.16912	1.15276	1.15017	0.189124	0.0277731	0.0323357	0.0292492
41	1.60458	1.17216	1.14481	1.15508	0.185947	0.0284847	0.0345497	0.0303656
41.3333	1.6077	1.17545	1.1466	1.15605	0.179709	0.0286846	0.0345213	0.0295035
41.6667	1.60505	1.17662	1.1456	1.15726	0.180564	0.0282027	0.0353795	0.0310691
42	1.60232	1.17682	1.14907	1.15717	0.181764	0.0288211	0.0343941	0.0308232
42.3333	1.61458	1.17821	1.14698	1.15943	0.184877	0.0287083	0.0352201	0.0309702
42.6667	1.61633	1.18218	1.14731	1.16293	0.183127	0.028752	0.0358497	0.031188
43	1.62035	1.1849	1.15153	1.15758	0.179197	0.0285554	0.0363754	0.0319581
43.3333	1.62044	1.18234	1.15478	1.15971	0.178613	0.0286788	0.0368905	0.0317855
43.6667	1.6146	1.18797	1.16105	1.16254	0.176776	0.0288512	0.0378102	0.031532
44	1.62478	1.19258	1.15867	1.15938	0.176146	0.0291364	0.0371793	0.0317948
44.3333	1.62235	1.19067	1.16103	1.16279	0.171797	0.0285427	0.0375473	0.0325459
44.6667	1.63353	1.19297	1.15807	1.1642	0.171602	0.0283258	0.0372358	0.0323365
45	1.63199	1.18999	1.15812	1.16662	0.173196	0.0291506	0.0380239	0.0336944
45.3333	1.64518	1.19812	1.15233	1.17162	0.174577	0.0298295	0.0374466	0.0348641
45.6667	1.65109	1.20127	1.15902	1.17503	0.172811	0.0295997	0.0386704	0.0336229
46	1.6599	1.20329	1.16098	1.17139	0.173804	0.0290212	0.0386287	0.0329765
46.3333	1.67335	1.20596	1.16385	1.17704	0.173697	0.0288552	0.0383538	0.0333237
46.6667	1.67702	1.20574	1.16575	1.17218	0.173763	0.0289187	0.0393344	0.0340057
47	1.69203	1.20918	1.17106	1.17085	0.175324	0.0286314	0.0400792	0.0346962
47.3333	1.67715	1.21098	1.17058	1.16996	0.171963	0.0298387	0.0388488	0.0341103
47.6667	1.68908	1.21018	1.16738	1.17118	0.172815	0.029739	0.0394233	0.0354412
48	1.6975	1.21579	1.16722	1.17534	0.174531	0.0298212	0.0391338	0.0353056
48.3333	1.68997	1.21793	1.1668	1.17551	0.173486	0.0302806	0.0393513	0.0353721
48.6667	1.68672	1.22025	1.1682	1.17953	0.171028	0.0307223	0.0390835	0.0349647
49	1.70309	1.22434	1.1715	1.18308	0.17419	0.0295134	0.0387658	0.0355287
49.3333	1.7023	1.22045	1.16549	1.18379	0.171996	0.0294233	0.0392645	0.035842
49.6667	1.71771	1.22272	1.16018	1.1759	0.173762	0.0300629	0.0381265	0.0359697
50	1.72116	1.22179	1.16087	1.18355	0.174664	0.0301375	0.0386736	0.0337098
50.3333	1.71348	1.22629	1.17056	1.18212	0.173683	0.0307013	0.0387474	0.0370369
50.6667	1.70379	1.2267	1.1683	1.18353	0.168642	0.03118	0.0390238	0.0359985
51	1.70889	1.22878	1.1665	1.17948	0.168672	0.0308942	0.0385083	0.0368984
51.3333	1.72532	1.23315	1.16713	1.18497	0.169609	0.0317007	0.0383963	0.0351816
51.6667	1.72257	1.23572	1.169	1.18048	0.171476	0.0314798	0.0378851	0.0367619
52	1.72122	1.2369	1.1731	1.18382	0.171233	0.0322094	0.038456	0.0362461
52.3333	1.71572	1.23897	1.16561	1.18209	0.168653	0.0330236	0.0388487	0.0358651
52.6667	1.72833	1.23967	1.16254	1.19448	0.172076	0.0328277	0.0383958	0.0362817
53	1.72706	1.24198	1.16207	1.19084	0.168309	0.0330787	0.0382009	0.0359538
53.3333	1.72589	1.23802	1.16004	1.19895	0.169366	0.0338832	0.0390286	0.0371497
53.6667	1.72737	1.24172	1.15881	1.19621	0.170144	0.0349933	0.0384215	0.0367419
54	1.74413	1.24703	1.15399	1.19186	0.173081	0.0345189	0.038764	0.0357238
54.3333	1.74145	1.25229	1.16019	1.19657	0.170346	0.0354422	0.0387164	0.0362622
54.6667	1.73009	1.25424	1.15603	1.19118	0.170093	0.035109	0.038153	0.0364584
55	1.72663	1.25793	1.15884	1.19143	0.164916	0.0353685	0.0392487	0.0355901
55.3333	1.73066	1.26278	1.16279	1.1967	0.16915	0.0362633	0.0394269	0.0350899
55.6667	1.73322	1.26667	1.1563	1.194	0.168324	0.0364394	0.0387681	0.0366396
56	1.7387	1.26292	1.16093	1.19842	0.167295	0.0367329	0.0390545	0.0359004
56.3333	1.75333	1.26737	1.15755	1.20077	0.170814	0.0374923	0.039813	0.0363581
56.6667	1.7471	1.26657	1.16259	1.20293	0.169388	0.0369638	0.0402966	0.036135
57	1.75276	1.27643	1.16234	1.20399	0.167225	0.0373738	0.041532	0.0372127
57.3333	1.75868	1.28215	1.1659	1.20896	0.171456	0.0386791	0.0409818	0.0357681
57.6667	1.75144	1.28659	1.16138	1.20299	0.170845	0.0387383	0.040558	0.0358265
58	1.75165	1.28786	1.1671	1.20595	0.168887	0.0385618	0.0414923	0.0360868
58.3333	1.753	1.28651	1.16561	1.20556	0.166797	0.0396597	0.0423267	0.0362694
58.6667	1.75096	1.28847	1.16504	1.20172	0.166719	0.0404408	0.0427181	0.0359464
59	1.7573	1.2929	1.16274	1.20201	0.165885	0.0407825	0.0422146	0.0364114
59.3333	1.76253	1.29115	1.15906	1.20173	0.16836	0.0406806	0.041654	0.035867
59.6667	1.76717	1.28756	1.1594	1.20467	0.167785	0.0423047	0.0426248	0.0362973
60	1.77134	1.29397	1.15861	1.20107	0.172223	0.0419505	0.0423055	0.0367199
60.3333	1.77354	1.29621	1.15961	1.19894	0.169183	0.0420908	0.042819	0.0364939
60.6667	1.78917	1.29515	1.15834	1.20312	0.16977	0.0423678	0.0422961	0.0356997
61	1.77859	1.29833	1.1603	1.19903	0.168975	0.0429863	0.0426543	0.035826
61.3333	1.79332	1.29787	1.16084	1.20344	0.171969	0.0436756	0.0439666	0.0369213
61.6667	1.79249	1.30286	1.15203	1.20563	0.169494	0.0448132	0.0433315	0.0367517
62	1.78769	1.30572	1.15258	1.20809	0.169639	0.0443315	0.0437881	0.0371956
62.3333	1.7965	1.30596	1.14939	1.20265	0.170213	0.045372	0.0440419	0.0365845
62.6667	1.77771	1.30994	1.1488	1.20074	0.169884	0.0443394	0.0452238	0.0362433
63	1.78267	1.306	1.14816	1.20864	0.169245	0.0460202	0.0472036	0.0360673
63.3333	1.79281	1.30938	1.15463	1.20404	0.172034	0.0457979	0.0465818	0.0364213
63.6667	1.79894	1.30921	1.15939	1.21956	0.172335	0.0476202	0.0475135	0.0361127
64	1.80703	1.30669	1.15684	1.20899	0.173774	0.0475462	0.0470985	0.0370663
64.3333	1.80542	1.30483	1.15501	1.20742	0.17595	0.0479201	0.0477639	0.0375944
64.6667	1.7944	1.31089	1.15847	1.20887	0.172701	0.0489886	0.0474986	0.0370271
65	1.80499	1.31012	1.15595	1.21087	0.173002	0.0490116	0.0477345	0.0373983
