# Supplementary material for: Movement of accessible plasma membrane cholesterol by the GRAMD1 lipid transfer protein complex
Source: eLife. 2019 Nov 14;8:e51401. doi: 10.7554/eLife.51401 (PMC6905856; doi:10.7554/eLife.51401)
Supplement: Figure 5—source data 1. [file elife-51401-fig5-data1.xlsx]

## Sheet: Source data Figure 5 D
Source data for Figure 5 D (Top)
GRAMD1b StART
	WT	5P
Replicate 1	30.4464	0.990099
Replicate 2	23.612	-3.50803
Replicate 3	29.4551	-3.46763
Source data for Figure 5 D (Bottom)
GRAMD1a StART
	WT	5P
Replicate 1	25.8644	-5.23506
Replicate 2	24.3564	-7.52889
Replicate 3	24.2064	-5.41596

## Sheet: Source data Figure 5 E
Source data for Figure 5 E
F/F0 (EGFP-GRAM1b) (Left)								Dot Plot (Right)
	Average			SEM				Individual Values
Time (min)	TKO	TKO + mRuby-GRAMD1b	TKO + mRuby-GRAMD1b (5P)	TKO	TKO + mRuby-GRAMD1b	TKO + mRuby-GRAMD1b (5P)		TKO	TKO + mRuby-GRAMD1b	TKO + mRuby-GRAMD1b (5P)
0	0.987577	0.964114	0.973143	0.00504411	0.0064249	0.0064249		0.583811	0.580175	2.1281
0.333333	0.988107	0.970696	0.975446	0.00460623	0.00598087	0.00598087		0.918689	0.336381	1.35407
0.666667	0.983917	0.973399	0.977304	0.00378854	0.00493916	0.00493916		0.824168	1.07114	2.38814
1	0.983664	0.977661	0.979175	0.00280204	0.00414487	0.00414487		1.17752	0.876642	2.3981
1.33333	0.982456	0.980921	0.980423	0.00197251	0.003328	0.003328		1.64987	0.530472	1.989
1.66667	0.982505	0.984578	0.982441	0.00156956	0.00280719	0.00280719		1.01927	0.545665	1.83737
2	0.984126	0.986637	0.982051	0.00219085	0.0026816	0.0026816		0.147182	0.558834	2.06953
2.33333	0.990529	0.989389	0.987182	0.00253431	0.00175741	0.00175741		0.242297	0.427126	2.54464
2.66667	0.994383	0.993177	0.991723	0.00264845	0.00150214	0.00150214		0.197959	0.70389	1.77095
3	0.99665	0.994262	0.99625	0.00233016	0.00103552	0.00103552		1.05164	0.717448	2.00484
3.33333	0.997788	0.994827	0.993183	0.00164215	0.00163393	0.00163393		0.493296	0.543715	2.31624
3.66667	1.00404	0.997495	1.00049	0.000521114	0.000937879	0.000937879		0.329976	0.336931	1.59846
4	1.00404	1.00348	1.00575	0.00114209	0.00113271	0.00113271		0.857418	0.51254	1.57977
4.33333	1.00188	1.00928	1.0062	0.00212247	0.00146692	0.00146692		0.687674	0.798996	2.00259
4.66667	1.00122	1.00747	1.00641	0.00353679	0.00158815	0.00158815		0.792222	0.175856	1.73306
5	1.02504	0.993816	1.01674	0.00558422	0.00615907	0.00615907		0.839497	0.254679	0.251828
5.33333	1.01574	1.00616	1.01316	0.00642584	0.00528183	0.00528183		0.816208	0.244882	0.236686
5.66667	1.01429	1.01337	1.01772	0.006774	0.00543754	0.00543754		1.75124	0.760106	0.841474
6	1.01479	1.02182	1.01683	0.00664898	0.00706765	0.00706765		1.43274	0.574717	0.450261
6.33333	1.01834	1.03154	1.01954	0.0065438	0.00853941	0.00853941		1.64936	0.962004	1.35304
6.66667	1.02158	1.03645	1.02301	0.00651012	0.0102418	0.0102418		1.66645	0.692684	0.0864249
7	1.02371	1.04241	1.01955	0.00648061	0.011427	0.011427		1.58029	0.553045	0.509897
7.33333	1.03101	1.05021	1.0304	0.00653986	0.0119312	0.0119312		1.92469	0.513986	0.873143
7.66667	1.03908	1.05985	1.04314	0.00679229	0.0113914	0.0113914		1.57596	1.19042	0.1292
8	1.05008	1.06132	1.04724	0.00873911	0.0124773	0.0124773		1.97289	1.0556	1.09352
8.33333	1.05969	1.06448	1.05816	0.0115297	0.0120754	0.0120754		1.40217	0.967782	1.19485
8.66667	1.06979	1.07081	1.06585	0.0135558	0.0122996	0.0122996		1.77086	0.385702	1.37656
9	1.07474	1.07974	1.07222	0.0154171	0.0118915	0.0118915		1.65792	0.490864	1.12669
9.33333	1.08868	1.08359	1.08189	0.0181543	0.0114267	0.0114267		1.09927	0.569384	0.479273
9.66667	1.10392	1.08446	1.09658	0.0211145	0.0114301	0.0114301		0.99935	0.781144	1.1938
10	1.11682	1.08999	1.11023	0.0235542	0.011234	0.011234		1.11188	0.807856	0.861458
10.3333	1.12892	1.10044	1.12691	0.0260347	0.0108076	0.0108076		1.27676	1.16472	1.32638
10.6667	1.14685	1.10455	1.14732	0.0282854	0.0108367	0.0108367		1.18833	0.794925	1.4112
11	1.16512	1.1111	1.16838	0.0309163	0.0110504	0.0110504		1.79789	0.713438	1.8067
11.3333	1.18355	1.12091	1.18301	0.0325915	0.0112658	0.0112658		1.6862	0.715434	1.09229
11.6667	1.20194	1.13169	1.19678	0.0335724	0.0121859	0.0121859		1.17497	0.677417	0.681279
12	1.22322	1.14328	1.21116	0.0347475	0.0131413	0.0131413		0.780952	0.53191	1.18669
12.3333	1.24842	1.1551	1.22133	0.0355082	0.0146859	0.0146859		1.34615	0.928178	1.50531
12.6667	1.2776	1.16972	1.23805	0.0366206	0.0172015	0.0172015		1.32546	0.843909	1.71299
13	1.30927	1.18712	1.25212	0.0379108	0.0191476	0.0191476		1.72012	0.793373	1.77943
13.3333	1.33508	1.2018	1.26715	0.0385801	0.0209218	0.0209218		1.5038	1.05498	1.38945
13.6667	1.3573	1.21253	1.2801	0.0386553	0.0229451	0.0229451		1.39773	0.974028	1.04444
14	1.38421	1.22931	1.29534	0.0386467	0.0248076	0.0248076		1.03404	0.657115	0.401014
14.3333	1.40543	1.24358	1.31155	0.0388524	0.025994	0.025994		1.76352	0.812363	0.682944
14.6667	1.43221	1.25469	1.32728	0.0393493	0.0276317	0.0276317		1.92967	0.471833	1.31958
15	1.45248	1.26421	1.34185	0.0398308	0.0284285	0.0284285		0.619625	0.863931	1.36265
15.3333	1.46985	1.26938	1.3631	0.0400382	0.0292282	0.0292282		1.3921	0.548563	2.62426
15.6667	1.48752	1.28111	1.38281	0.0404875	0.0297856	0.0297856		1.35597	1.03643	0.543159
16	1.50475	1.29343	1.39475	0.0406098	0.0316944	0.0316944		0.752992	0.568496	1.34622
16.3333	1.51674	1.30776	1.41196	0.0411601	0.0333481	0.0333481		1.7813	0.866179	2.0104
16.6667	1.52423	1.32458	1.4289	0.0412501	0.0355957	0.0355957		1.97107	0.715264	1.77742
17	1.53387	1.33675	1.44338	0.041483	0.037149	0.037149		0.450495	0.72559	1.8004
17.3333	1.54444	1.35577	1.45718	0.0416609	0.0384941	0.0384941		0.481245	0.661795	1.34252
17.6667	1.54806	1.3701	1.47258	0.041624	0.0391297	0.0391297		0.460247	0.84085	1.7909
18	1.55639	1.37616	1.48944	0.0421842	0.0396665	0.0396665		1.00154	0.710872	1.53342
18.3333	1.56181	1.38154	1.49793	0.0427813	0.0402653	0.0402653		0.365254	0.873699	0.657888
18.6667	1.55877	1.38859	1.50585	0.0429443	0.0414222	0.0414222		0.956328	0.535496	0.916613
19	1.56568	1.39504	1.52127	0.0440884	0.042039	0.042039		0.650028		0.629237
19.3333	1.56723	1.40086	1.52689	0.0443998	0.0423459	0.0423459		1.42917		0.726064
19.6667	1.56827	1.40697	1.53869	0.0446959	0.043154	0.043154		1.0122		1.34647
20	1.5717	1.41668	1.55089	0.0454889	0.0430649	0.0430649		1.32996		1.48147
20.3333	1.57683	1.42325	1.56138	0.0453751	0.0429816	0.0429816		1.41864		1.32546
20.6667	1.57963	1.4282	1.56953	0.0456519	0.0426788	0.0426788		1.08984		1.12452
21	1.58691	1.43155	1.58001	0.0459273	0.0423536	0.0423536		1.23855		1.69752
21.3333	1.59751	1.43519	1.58932	0.0464615	0.0421419	0.0421419		1.44025
21.6667	1.60436	1.43719	1.6046	0.0461835	0.0418208	0.0418208		1.32182
22	1.61756	1.43622	1.6097	0.0461231	0.0422537	0.0422537		1.40659
22.3333	1.62903	1.43685	1.61445	0.0462618	0.0421083	0.0421083		1.49838
22.6667	1.63822	1.44176	1.62829	0.0459274	0.0419031	0.0419031		1.20204
23	1.64702	1.45355	1.63686	0.0455271	0.042307	0.042307		1.12251
23.3333	1.66239	1.45591	1.64661	0.0456527	0.0418866	0.0418866		1.51198
23.6667	1.67584	1.45505	1.65908	0.0451835	0.0409735	0.0409735		1.56417
24	1.69406	1.45496	1.6692	0.0451817	0.0419162	0.0419162		1.53915
24.3333	1.71102	1.45705	1.67536	0.0448126	0.0413668	0.0413668		0.749984
24.6667	1.72193	1.46085	1.69132	0.0440451	0.0417664	0.0417664		1.17244
25	1.73099	1.45993	1.70307	0.0436088	0.041415	0.041415		0.813385
25.3333	1.74316	1.46445	1.71333	0.043532	0.0411302	0.0411302		1.35133
25.6667	1.75795	1.46725	1.71837	0.04376	0.0408987	0.0408987		1.34508
26	1.77335	1.46387	1.7288	0.044104	0.0403068	0.0403068		1.02424
26.3333	1.775	1.46756	1.74377	0.044083	0.0408322	0.0408322		1.08707
26.6667	1.78385	1.46797	1.74653	0.0446367	0.0402709	0.0402709		1.12173
27	1.79195	1.46611	1.75828	0.0447771	0.0399913	0.0399913		0.743032
27.3333	1.79673	1.46921	1.76819	0.0449657	0.039785	0.039785		0.950646
27.6667	1.80264	1.47445	1.77493	0.0459196	0.0395268	0.0395268		1.21439
28	1.79218	1.47338	1.78824	0.0454527	0.0394173	0.0394173
28.3333	1.79482	1.47133	1.79017	0.0460164	0.0385192	0.0385192
28.6667	1.79349	1.47029	1.80151	0.0467254	0.0392642	0.0392642
29	1.79499	1.47004	1.81037	0.0474877	0.0383487	0.0383487
29.3333	1.80259	1.47034	1.81315	0.0476301	0.038556	0.038556
29.6667	1.79754	1.47516	1.81688	0.0479368	0.038477	0.038477
30	1.80612	1.47882	1.82815	0.0489953	0.0373284	0.0373284
30.3333	1.80543	1.48141	1.83839	0.0492175	0.0369752	0.0369752
30.6667	1.80432	1.48761	1.84592	0.0490456	0.0368783	0.0368783
31	1.81483	1.49331	1.85388	0.0497949	0.0369798	0.0369798
31.3333	1.81689	1.49704	1.86315	0.0499385	0.0364063	0.0364063
31.6667	1.82258	1.5017	1.87222	0.049775	0.0360775	0.0360775
32	1.82807	1.50902	1.87848	0.0496975	0.0367918	0.0367918
32.3333	1.83804	1.51651	1.88857	0.0502132	0.0372663	0.0372663
32.6667	1.85151	1.51764	1.89779	0.050442	0.0363102	0.0363102
33	1.85372	1.52197	1.9111	0.0499047	0.0362744	0.0362744
33.3333	1.84804	1.51887	1.91937	0.0489336	0.0366501	0.0366501
33.6667	1.84817	1.52427	1.92398	0.0484128	0.0365556	0.0365556
34	1.85218	1.52334	1.92743	0.0477991	0.0361876	0.0361876
34.3333	1.86044	1.52587	1.93269	0.047307	0.0364505	0.0364505
34.6667	1.86308	1.53052	1.93724	0.0473636	0.0364136	0.0364136
35	1.86726	1.52931	1.94156	0.0468755	0.0367041	0.0367041
35.3333	1.87522	1.52656	1.95016	0.0469559	0.0366503	0.0366503
35.6667	1.88521	1.53386	1.9614	0.0473816	0.0367365	0.0367365
36	1.89171	1.53787	1.96976	0.0466456	0.036412	0.036412
36.3333	1.90003	1.53941	1.97115	0.0467211	0.0361955	0.0361955
36.6667	1.90109	1.54264	1.98287	0.0466341	0.0359803	0.0359803
37	1.90848	1.54661	1.98958	0.0464756	0.0361213	0.0361213
37.3333	1.91941	1.55388	2.00008	0.0459121	0.0361603	0.0361603
37.6667	1.91764	1.55769	2.01004	0.0457682	0.0358272	0.0358272
38	1.92475	1.55733	2.02044	0.0460259	0.0359305	0.0359305
38.3333	1.93137	1.56551	2.02244	0.045763	0.0354465	0.0354465
38.6667	1.94254	1.57011	2.02753	0.0459978	0.0355655	0.0355655
39	1.95466	1.56789	2.03509	0.046143	0.0355804	0.0355804
39.3333	1.95287	1.57019	2.03672	0.0460452	0.0354024	0.0354024
39.6667	1.95852	1.5753	2.04201	0.0461828	0.0351582	0.0351582
40	1.96961	1.57883	2.05297	0.0465844	0.0349483	0.0349483
40.3333	1.96927	1.58511	2.05804	0.0464441	0.0355334	0.0355334
40.6667	1.9701	1.58539	2.06901	0.0467728	0.0349578	0.0349578
41	1.97604	1.58621	2.07399	0.0473165	0.0348713	0.0348713
41.3333	1.98717	1.58821	2.08137	0.0478215	0.0342589	0.0342589
41.6667	1.98935	1.59166	2.08082	0.0480644	0.0339907	0.0339907
42	1.98916	1.6006	2.08744	0.0483711	0.034508	0.034508
42.3333	2.00099	1.59818	2.09208	0.0488169	0.0336508	0.0336508
42.6667	2.0041	1.60624	2.10387	0.0488791	0.0342621	0.0342621
43	2.0015	1.60576	2.10607	0.0490295	0.0338274	0.0338274
43.3333	2.0047	1.61201	2.11708	0.0491993	0.0334819	0.0334819
43.6667	2.00987	1.6158	2.12089	0.0494262	0.0334204	0.0334204
44	2.01059	1.60786	2.12616	0.0499369	0.0332978	0.0332978
44.3333	2.01402	1.60984	2.13241	0.0505567	0.0331987	0.0331987
44.6667	2.02012	1.61559	2.13414	0.0509415	0.0329808	0.0329808
45	2.02002	1.61248	2.13709	0.0512535	0.0324183	0.0324183
45.3333	2.02888	1.61785	2.14537	0.0520752	0.0329367	0.0329367
45.6667	2.03239	1.61849	2.14514	0.0523326	0.0327358	0.0327358
46	2.03601	1.62321	2.15062	0.0523585	0.0325713	0.0325713
46.3333	2.03816	1.63338	2.15638	0.0529641	0.0328003	0.0328003
46.6667	2.03898	1.63852	2.16891	0.0529219	0.0327191	0.0327191
47	2.04423	1.64092	2.16652	0.0531601	0.0325649	0.0325649
47.3333	2.04901	1.64342	2.17158	0.0532168	0.0321083	0.0321083
47.6667	2.05708	1.64644	2.18447	0.0532385	0.0327412	0.0327412
48	2.05632	1.64657	2.19151	0.0531497	0.0322215	0.0322215
48.3333	2.05625	1.64899	2.19357	0.0529041	0.0322559	0.0322559
48.6667	2.06128	1.64657	2.19762	0.0528366	0.0321174	0.0321174
49	2.0637	1.65201	2.20172	0.0524412	0.0322876	0.0322876
49.3333	2.07185	1.65205	2.20274	0.0526006	0.0325314	0.0325314
49.6667	2.07542	1.65778	2.20448	0.0524971	0.0326638	0.0326638
50	2.07386	1.66358	2.20897	0.0521187	0.0329164	0.0329164
50.3333	2.07824	1.66121	2.21838	0.0519097	0.0327954	0.0327954
50.6667	2.07985	1.65978	2.2213	0.0516882	0.0321059	0.0321059
51	2.08021	1.65939	2.22318	0.0509764	0.0325172	0.0325172
51.3333	2.08644	1.66616	2.2293	0.0509606	0.0327242	0.0327242
51.6667	2.08946	1.66486	2.22967	0.0509528	0.0323875	0.0323875
52	2.09131	1.66293	2.23225	0.050334	0.0322198	0.0322198
52.3333	2.09061	1.66703	2.232	0.0502841	0.0320777	0.0320777
52.6667	2.09669	1.67091	2.2354	0.049688	0.0321222	0.0321222
53	2.09586	1.67527	2.24096	0.0497469	0.0319222	0.0319222
53.3333	2.1009	1.6761	2.25039	0.0494682	0.0318623	0.0318623
53.6667	2.09588	1.67903	2.25701	0.0492371	0.0316178	0.0316178
54	2.1073	1.67639	2.25807	0.0489426	0.0319423	0.0319423
54.3333	2.11209	1.67698	2.26223	0.0489622	0.0309699	0.0309699
54.6667	2.11551	1.67727	2.2664	0.0489149	0.0306986	0.0306986
55	2.11013	1.68347	2.2696	0.0483515	0.0308849	0.0308849
55.3333	2.11064	1.6837	2.26767	0.0480765	0.030597	0.030597
55.6667	2.1136	1.68283	2.27612	0.0479398	0.0306292	0.0306292
56	2.11715	1.68791	2.27891	0.0478107	0.0305605	0.0305605
56.3333	2.1156	1.68877	2.28503	0.0476164	0.0305346	0.0305346
56.6667	2.11705	1.6903	2.28036	0.0476745	0.0305449	0.0305449
57	2.12037	1.69223	2.28202	0.0478284	0.0308952	0.0308952
57.3333	2.12778	1.69078	2.29285	0.048865	0.0303894	0.0303894
57.6667	2.12947	1.6922	2.29372	0.0489273	0.0301306	0.0301306
58	2.11863	1.68902	2.30255	0.0477996	0.0299512	0.0299512
58.3333	2.1198	1.69109	2.30626	0.0476851	0.02996	0.02996
58.6667	2.11902	1.69431	2.31013	0.0475672	0.0302343	0.0302343
59	2.13437	1.69178	2.32058	0.0485303	0.0298356	0.0298356
59.3333	2.13233	1.69345	2.31794	0.0482834	0.0304282	0.0304282
59.6667	2.13056	1.69248	2.3148	0.0482902	0.030022	0.030022
60	2.13257	1.69498	2.3159	0.0489773	0.0303051	0.0303051
60.3333	2.12669	1.69191	2.32305	0.0487723	0.0299601	0.0299601
60.6667	2.13304	1.6976	2.324	0.0493125	0.03047	0.03047
61	2.13853	1.69373	2.32667	0.0495002	0.0305436	0.0305436
61.3333	2.13916	1.68929	2.33275	0.0500137	0.0301231	0.0301231
61.6667	2.14691	1.686	2.32842	0.0509414	0.0297056	0.0297056
62	2.13987	1.68685	2.33463	0.050047	0.0297497	0.0297497
62.3333	2.13995	1.69169	2.33465	0.0497577	0.0296756	0.0296756
62.6667	2.14084	1.68686	2.33804	0.0500168	0.0292274	0.0292274
63	2.14391	1.69252	2.34084	0.0500899	0.0298602	0.0298602
63.3333	2.15743	1.68675	2.34258	0.0505749	0.0297764	0.0297764
63.6667	2.15687	1.69363	2.34542	0.0505567	0.0301504	0.0301504
64	2.165	1.69507	2.34707	0.050734	0.0300843	0.0300843
64.3333	2.16799	1.69408	2.3431	0.0506709	0.0300792	0.0300792
64.6667	2.17013	1.69251	2.343	0.0507576	0.0297368	0.0297368
65	2.16769	1.69476	2.34534	0.0501611	0.0303563	0.0303563

## Sheet: Source data Figure 5 F
Source data for Figure 5 F
F/F0 (mRuby) (Left)						Dot Plot (Right)
	Average		SEM			Individual Values
Time (min)	TKO + mRuby-GRAMD1b	TKO + mRuby-GRAMD1b (5P)	TKO + mRuby-GRAMD1b	TKO + mRuby-GRAMD1b (5P)		TKO + mRuby-GRAMD1b	TKO + mRuby-GRAMD1b (5P)
0	1.04421	1.03761	0.00972676	0.00972676		0.16426	3.87613
0.333333	1.0381	1.03828	0.0086891	0.0086891		0.272398	1.10496
0.666667	1.0297	1.0331	0.00710775	0.00710775		0.62023	2.08038
1	1.02598	1.0296	0.00617595	0.00617595		0.627868	2.47916
1.33333	1.02095	1.01421	0.00566012	0.00566012		0.668409	4.89232
1.66667	1.01987	1.01459	0.00485782	0.00485782		1.39133	4.82329
2	1.01257	1.01208	0.00445326	0.00445326		0.585772	4.63031
2.33333	1.00376	1.01174	0.00379322	0.00379322		0.586981	1.68969
2.66667	1.0087	1.00038	0.00278136	0.00278136		1.35083	3.65408
3	1.00738	1.00764	0.00295958	0.00295958		1.42841	5.43072
3.33333	0.99535	1.00596	0.0023379	0.0023379		2.62849	5.24059
3.66667	0.994459	1.00694	0.00247403	0.00247403		1.77997	0.581653
4	0.995252	1.00345	0.00285856	0.00285856		0.409077	2.53771
4.33333	1.00931	0.973226	0.00452255	0.00452255		0.665153	3.75615
4.66667	0.989545	1.00241	0.00364208	0.00364208		0.060634	0.280237
5	0.99722	1.01695	0.00841127	0.00841127		0.512351	-0.397303
5.33333	1.02776	1.01315	0.0131512	0.0131512		0.177379	0.0772889
5.66667	1.02875	1.01609	0.0163111	0.0163111		0.439393	0.343576
6	1.04813	1.00983	0.0190724	0.0190724		0.847247	0.643558
6.33333	1.04644	1.01328	0.0213348	0.0213348		2.29016	1.32886
6.66667	1.04908	1.01784	0.0216794	0.0216794		0.267463	0.932527
7	1.05536	1.01422	0.021954	0.021954		1.15923	0.780116
7.33333	1.05648	1.0231	0.0219032	0.0219032		0.792865	1.16378
7.66667	1.06423	1.04743	0.0215462	0.0215462		2.02714	1.23927
8	1.07016	1.06412	0.0227399	0.0227399		1.66968	0.912187
8.33333	1.07354	1.08191	0.023963	0.023963		2.62772	1.37394
8.66667	1.07998	1.09556	0.0243623	0.0243623		0.078351	0.91285
9	1.08781	1.11196	0.025348	0.025348		0.897463	0.108762
9.33333	1.1017	1.13123	0.0270692	0.0270692		0.560476	-0.0879321
9.66667	1.09878	1.14617	0.0282999	0.0282999		0.661507	1.46697
10	1.10415	1.15881	0.0295217	0.0295217		0.76993	0.575105
10.3333	1.12265	1.17821	0.0291922	0.0291922		0.87967	1.63559
10.6667	1.12915	1.20014	0.0314411	0.0314411		0.476689	1.0903
11	1.14102	1.23884	0.0321436	0.0321436		0.271376	1.40482
11.3333	1.15291	1.26868	0.0339123	0.0339123		0.454551	0.368209
11.6667	1.15542	1.30744	0.0345739	0.0345739		0.371104	-0.198713
12	1.16797	1.33392	0.0355267	0.0355267		0.249546	2.01114
12.3333	1.17821	1.36245	0.0367527	0.0367527		0.651919	1.31497
12.6667	1.18667	1.39502	0.0373598	0.0373598		0.502417	3.20696
13	1.20723	1.4138	0.0381099	0.0381099		0.69809	2.12697
13.3333	1.22474	1.43228	0.0395879	0.0395879		0.523188	1.05087
13.6667	1.24219	1.46032	0.04096	0.04096		0.349303	0.84922
14	1.25741	1.48369	0.0434342	0.0434342		0.302716	-0.0571045
14.3333	1.28564	1.51147	0.0463941	0.0463941		0.26337	-0.118155
14.6667	1.32044	1.54266	0.0499067	0.0499067		1.30151	0.651059
15	1.32982	1.56279	0.0516044	0.0516044		0.999387	1.52526
15.3333	1.35954	1.59007	0.0552943	0.0552943		1.69208	1.21889
15.6667	1.38484	1.61879	0.0590109	0.0590109		1.23115	0.14763
16	1.40221	1.6491	0.0594022	0.0594022		1.91476	0.797535
16.3333	1.42455	1.67257	0.0611914	0.0611914		0.552958	0.66613
16.6667	1.4531	1.70014	0.064919	0.064919		1.03681	1.14014
17	1.479	1.72935	0.0665002	0.0665002		0.585737	4.3843
17.3333	1.51555	1.75116	0.0700567	0.0700567		0.314257	2.53948
17.6667	1.54352	1.76575	0.0748384	0.0748384		0.38904	2.24116
18	1.5802	1.78924	0.078458	0.078458		1.00231	2.38431
18.3333	1.5962	1.8081	0.0827172	0.0827172		0.798833	1.22791
18.6667	1.62455	1.8231	0.0880666	0.0880666		3.71957	0.654551
19	1.65099	1.8443	0.0921068	0.0921068			1.73919
19.3333	1.66892	1.86689	0.0967907	0.0967907			1.71496
19.6667	1.68863	1.88982	0.100541	0.100541			1.57672
20	1.70818	1.9063	0.102726	0.102726			1.80342
20.3333	1.70335	1.92602	0.103294	0.103294			1.61785
20.6667	1.72313	1.93999	0.10471	0.10471			2.19317
21	1.7313	1.96557	0.105649	0.105649			3.07549
21.3333	1.73087	1.98116	0.107068	0.107068
21.6667	1.73567	2.00275	0.106946	0.106946
22	1.74786	2.02162	0.108447	0.108447
22.3333	1.75775	2.03098	0.109451	0.109451
22.6667	1.7591	2.04684	0.109332	0.109332
23	1.75963	2.07043	0.108037	0.108037
23.3333	1.75934	2.08376	0.106949	0.106949
23.6667	1.76566	2.10324	0.105797	0.105797
24	1.7569	2.10879	0.105951	0.105951
24.3333	1.75593	2.11977	0.104257	0.104257
24.6667	1.76224	2.13918	0.101982	0.101982
25	1.76405	2.15781	0.100176	0.100176
25.3333	1.76209	2.15991	0.100822	0.100822
25.6667	1.76323	2.1723	0.0989829	0.0989829
26	1.77472	2.19015	0.0978018	0.0978018
26.3333	1.76626	2.20941	0.0960418	0.0960418
26.6667	1.77464	2.2185	0.0956753	0.0956753
27	1.76508	2.23511	0.0939336	0.0939336
27.3333	1.76134	2.24227	0.0923159	0.0923159
27.6667	1.75785	2.26325	0.0909188	0.0909188
28	1.76304	2.28555	0.0901056	0.0901056
28.3333	1.76293	2.29115	0.0906734	0.0906734
28.6667	1.75689	2.30666	0.0883457	0.0883457
29	1.75506	2.30564	0.0863695	0.0863695
29.3333	1.74864	2.31644	0.0865454	0.0865454
29.6667	1.75397	2.31426	0.0840371	0.0840371
30	1.75507	2.33033	0.0830794	0.0830794
30.3333	1.75044	2.34613	0.0817446	0.0817446
30.6667	1.75865	2.35299	0.0817957	0.0817957
31	1.76084	2.36187	0.0805208	0.0805208
31.3333	1.7717	2.37149	0.0786975	0.0786975
31.6667	1.77764	2.37898	0.0776724	0.0776724
32	1.78785	2.3946	0.0757318	0.0757318
32.3333	1.79362	2.41002	0.0753022	0.0753022
32.6667	1.80333	2.4227	0.0755448	0.0755448
33	1.81043	2.43611	0.0752289	0.0752289
33.3333	1.80844	2.44469	0.0754243	0.0754243
33.6667	1.80706	2.45281	0.0741744	0.0741744
34	1.80631	2.45121	0.0734322	0.0734322
34.3333	1.81533	2.45169	0.073911	0.073911
34.6667	1.81486	2.47549	0.0727568	0.0727568
35	1.81704	2.46576	0.0725691	0.0725691
35.3333	1.81801	2.47064	0.072186	0.072186
35.6667	1.81454	2.48739	0.0711054	0.0711054
36	1.81272	2.50266	0.07072	0.07072
36.3333	1.80702	2.50427	0.0699954	0.0699954
36.6667	1.8191	2.52173	0.0707715	0.0707715
37	1.82192	2.52715	0.0712181	0.0712181
37.3333	1.82338	2.53838	0.070987	0.070987
37.6667	1.82897	2.55758	0.0705294	0.0705294
38	1.824	2.57631	0.0697073	0.0697073
38.3333	1.82803	2.58126	0.0700235	0.0700235
38.6667	1.82509	2.58243	0.0689176	0.0689176
39	1.82544	2.59195	0.0686332	0.0686332
39.3333	1.82824	2.6084	0.0694326	0.0694326
39.6667	1.8258	2.6203	0.0684182	0.0684182
40	1.83088	2.61461	0.0686188	0.0686188
40.3333	1.8348	2.62513	0.0684836	0.0684836
40.6667	1.82782	2.64268	0.0683155	0.0683155
41	1.83192	2.65354	0.0681558	0.0681558
41.3333	1.83165	2.6546	0.0679802	0.0679802
41.6667	1.83909	2.65286	0.068884	0.068884
42	1.84187	2.67162	0.0679884	0.0679884
42.3333	1.83961	2.66949	0.0677137	0.0677137
42.6667	1.83932	2.68665	0.0679172	0.0679172
43	1.84662	2.69035	0.0676793	0.0676793
43.3333	1.85176	2.6883	0.0672166	0.0672166
43.6667	1.84918	2.69863	0.0674016	0.0674016
44	1.84982	2.70287	0.068163	0.068163
44.3333	1.85231	2.69736	0.0678214	0.0678214
44.6667	1.85198	2.70258	0.0683265	0.0683265
45	1.84947	2.70496	0.0693662	0.0693662
45.3333	1.84868	2.70086	0.0697327	0.0697327
45.6667	1.85373	2.69857	0.0709422	0.0709422
46	1.86453	2.69837	0.0719402	0.0719402
46.3333	1.86929	2.70231	0.0726814	0.0726814
46.6667	1.86813	2.70533	0.0743032	0.0743032
47	1.87035	2.70213	0.074587	0.074587
47.3333	1.86859	2.69446	0.0748787	0.0748787
47.6667	1.87318	2.71861	0.0755116	0.0755116
48	1.87943	2.7264	0.0768953	0.0768953
48.3333	1.87814	2.70719	0.0769079	0.0769079
48.6667	1.88518	2.71601	0.0778351	0.0778351
49	1.88582	2.71632	0.0786808	0.0786808
49.3333	1.88423	2.70514	0.078932	0.078932
49.6667	1.89647	2.70136	0.0807996	0.0807996
50	1.89461	2.70436	0.0801886	0.0801886
50.3333	1.89923	2.70196	0.0813774	0.0813774
50.6667	1.88913	2.7019	0.081461	0.081461
51	1.88763	2.70296	0.0828571	0.0828571
51.3333	1.88815	2.70982	0.082651	0.082651
51.6667	1.89291	2.7052	0.0845827	0.0845827
52	1.88631	2.69035	0.0842782	0.0842782
52.3333	1.89927	2.68436	0.0867868	0.0867868
52.6667	1.90553	2.68249	0.0884541	0.0884541
53	1.9124	2.68272	0.0902486	0.0902486
53.3333	1.92109	2.69115	0.0924507	0.0924507
53.6667	1.92281	2.69571	0.0947127	0.0947127
54	1.92023	2.68566	0.094905	0.094905
54.3333	1.92469	2.68215	0.0981035	0.0981035
54.6667	1.9178	2.68019	0.0980837	0.0980837
55	1.92181	2.67153	0.0984785	0.0984785
55.3333	1.93211	2.66878	0.101167	0.101167
55.6667	1.92909	2.67837	0.100418	0.100418
56	1.9325	2.67717	0.100397	0.100397
56.3333	1.93226	2.68107	0.100555	0.100555
56.6667	1.93341	2.67226	0.100587	0.100587
57	1.93303	2.66425	0.101572	0.101572
57.3333	1.92432	2.6788	0.0999546	0.0999546
57.6667	1.92756	2.67692	0.101058	0.101058
58	1.9221	2.69577	0.102223	0.102223
58.3333	1.91467	2.68539	0.101099	0.101099
58.6667	1.91905	2.67985	0.101997	0.101997
59	1.90733	2.67557	0.100229	0.100229
59.3333	1.90147	2.66985	0.0996119	0.0996119
59.6667	1.90208	2.66481	0.0974046	0.0974046
60	1.90077	2.67204	0.098606	0.098606
60.3333	1.90084	2.66033	0.0970285	0.0970285
60.6667	1.89807	2.6552	0.0967681	0.0967681
61	1.89232	2.66066	0.0957495	0.0957495
61.3333	1.88744	2.65826	0.0949442	0.0949442
61.6667	1.89822	2.64608	0.0955927	0.0955927
62	1.88794	2.64662	0.0948394	0.0948394
62.3333	1.88525	2.64469	0.0948793	0.0948793
62.6667	1.88457	2.64136	0.0966286	0.0966286
63	1.89216	2.63553	0.0954182	0.0954182
63.3333	1.89314	2.635	0.0966937	0.0966937
63.6667	1.89314	2.62669	0.0962043	0.0962043
64	1.88984	2.61023	0.0958656	0.0958656
64.3333	1.89398	2.60109	0.0949817	0.0949817
64.6667	1.8823	2.5971	0.0955041	0.0955041
65	1.88685	2.58692	0.0953194	0.0953194
