# Supplementary material for: Movement of accessible plasma membrane cholesterol by the GRAMD1 lipid transfer protein complex
Source: eLife. 2019 Nov 14;8:e51401. doi: 10.7554/eLife.51401 (PMC6905856; doi:10.7554/eLife.51401)
Supplement: Figure 6—figure supplement 1—source data 1. [file elife-51401-fig6-figsupp1-data1.xlsx]

## Sheet: Source data Figure 6-S-1 A,B
Source data for Figure 6-figure supplement 1 A
Cleaved SREBP2 (ratio)
	Control		TKO		TKO + GRAMD1b		TKO + GRAMD1b (5P)		TKO + GRAMD1b (ΔGRAM)
Smase	-	+	-	+	-	+	-	+	-	+
Replicate 1	0.25862	0.042878	0.232842	0.170776	0.24249	0.085823	0.286914	0.160595	0.330022	0.15299
Replicate 2	0.372574	0.052347	0.257297	0.118828	0.231688	0.085934	0.221511	0.149508	0.18145	0.183606
Replicate 3	0.413157	0.062825	0.409745	0.269439	0.392984	0.137384	0.397863	0.185642	0.401257	0.246574
Replicate 4	0.329562	0.038327	0.25558	0.197281	0.272626	0.146453	0.298563	0.183331	0.318895	0.167479
Replicate 5	0.508062	0.252021	0.465297	0.271453	0.421866	0.171718	0.444809	0.198511	0.514807	0.291304
Replicate 6	0.519552	0.231946	0.501222	0.263824	0.425717	0.139435	0.366614	0.155847	0.378705	0.245469
Source data for Figure 6-figure supplement 1 B
Cleaved SREBP2 (ratio)
	Control		TKO		TKO + GRAMD1b		TKO + GRAMD1b (TM swap)
Smase	-	+	-	+	-	+	-	+
Replicate 1	0.586765	0.185861	0.623478	0.362051	0.605808	0.141973	0.651097	0.24731
Replicate 2	0.483889	0.072253	0.357378	0.197201	0.375693	0.123277	0.385595	0.20053
Replicate 3	0.175003	0.03765	0.247485	0.153611	0.282058	0.109953	0.36337	0.181529
Replicate 4	0.436722	0.126428	0.519045	0.263119	0.354208	0.069077	0.296206	0.126912
Replicate 5	0.619529	0.132682	0.439562	0.212077	0.484596	0.123733	0.503555	0.180897

## Sheet: Source data Figure 6 C
Source data for Figure 6 C
F/F0 (EGFP-GRAM1b) (Left)								Dot Plot (Right)
	Average			SEM				Individual Values
Time (min)	TKO	TKO + mRuby-GRAMD1b	TKO + mRuby-GRAMD1b (TM swap)	TKO	TKO + mRuby-GRAMD1b	TKO + mRuby-GRAMD1b (TM swap)		TKO	TKO + mRuby-GRAMD1b	TKO + mRuby-GRAMD1b (TM swap)
0	1.00239	0.968371	0.957312	0.00970737	0.00324949	0.00445119		1.09643	0.214427	1.08994
0.333333	1.00198	0.969705	0.961069	0.00884319	0.00322042	0.00409799		0.924089	0.22063	0.860311
0.666667	1.0015	0.973475	0.965702	0.00828152	0.00299811	0.00467589		0.987437	0.308894	0.392567
1	0.997887	0.978034	0.967289	0.00720758	0.00259049	0.00398906		0.942883	0.151282	0.573056
1.33333	0.993687	0.980588	0.975752	0.00691327	0.00207783	0.00332221		2.59424	0.349171	0.670641
1.66667	0.990329	0.98195	0.987066	0.00637727	0.00169288	0.00261491		1.74996	0.192945	0.740493
2	0.986584	0.982764	0.989094	0.00539184	0.00149411	0.00201777		0.951189	0.197999	0.640031
2.33333	0.99053	0.991092	0.988812	0.00540171	0.00117848	0.00192476		1.19941	0.26429	1.09336
2.66667	0.993018	0.993483	0.988104	0.00411676	0.00119955	0.00184276		2.42203	0.299332	0.770644
3	0.996148	0.99412	0.994752	0.00197784	0.00137704	0.00116825		1.1817	0.249087	0.823489
3.33333	0.997359	0.998217	0.998252	0.000739673	0.000857339	0.000719307		1.46905	0.591712	0.549711
3.66667	1.00246	0.997244	0.998998	0.00128873	0.000792542	0.00109286		0.873082	0.500213	0.980503
4	1.00413	1.00126	1.0049	0.00137696	0.00057571	0.000834455		0.956012	0.21149	0.92164
4.33333	1.00278	1.00635	1.00683	0.00171825	0.00121045	0.0018857		1.6712	0.04776	0.866991
4.66667	1.00411	1.00932	1.00817	0.00237672	0.00222396	0.00181368		1.77255	0.391381	0.744071
5	1.00918	0.998131	1.00519	0.00541924	0.00357383	0.00510664		1.05131	0.357416	1.50627
5.33333	1.01176	0.99604	0.996854	0.00655942	0.0029361	0.00458595		1.24761	0.330154	0.18239
5.66667	1.01959	0.994733	1.00931	0.00778575	0.00332743	0.00578015		0.259386	0.272894	0.946401
6	1.03122	0.992334	1.01822	0.00878782	0.00338915	0.00744902		0.344397	0.361804	1.28481
6.33333	1.0462	0.993438	1.02249	0.0097474	0.00363843	0.00903444		0.393832	0.374672	0.765318
6.66667	1.04931	0.994499	1.02777	0.0102468	0.00351583	0.00949023		0.844914	0.499841	0.613391
7	1.05591	0.992383	1.03612	0.0103121	0.00341154	0.0102101		0.288197	0.279261	1.08353
7.33333	1.0619	0.995639	1.04126	0.0108156	0.00368447	0.010096		1.25717	0.392602	0.531032
7.66667	1.06869	1.00036	1.05875	0.0120554	0.003929	0.0121593		1.28134	0.412804	0.550259
8	1.0773	1.00655	1.07254	0.0129484	0.00466353	0.0149821		1.58514	0.381317	0.436491
8.33333	1.09411	1.01346	1.08804	0.0145507	0.00504097	0.0162613		1.13903	0.286644	0.834434
8.66667	1.10359	1.0196	1.09638	0.0172165	0.00625505	0.0182467		0.900688	0.320382	1.01633
9	1.11515	1.03354	1.11868	0.0191059	0.00781346	0.0208576		1.2124	0.321423	1.14264
9.33333	1.12489	1.04102	1.14204	0.0212544	0.0091287	0.0243886		0.884265	0.327958	1.09891
9.66667	1.13299	1.04549	1.16076	0.0226261	0.00995736	0.0268279		0.851191	0.357437	0.987759
10	1.14295	1.05554	1.17758	0.0232508	0.0107879	0.0288749		0.516958	0.990793	1.09288
10.3333	1.14983	1.06236	1.19604	0.024298	0.0114405	0.0305157		0.700054	0.54819	1.1741
10.6667	1.15954	1.07144	1.21479	0.0244715	0.0119366	0.0316767		0.801732	0.535868	0.434825
11	1.16891	1.08187	1.22992	0.0254771	0.0122122	0.0330762		1.63413	0.774623	0.490654
11.3333	1.17803	1.09665	1.24268	0.0259466	0.0128889	0.0344034		0.317612	0.77116	1.01251
11.6667	1.18808	1.10773	1.25626	0.0267031	0.0135292	0.0353629		0.457304	0.756129	0.270141
12	1.19739	1.11862	1.26143	0.0274468	0.0139097	0.0367296		1.83423	0.483274	0.868644
12.3333	1.20143	1.1316	1.27039	0.0275115	0.0146837	0.0377215		0.428728	0.341689	0.984992
12.6667	1.21251	1.14694	1.28118	0.0280969	0.0152254	0.0385658		0.308793	0.457813	0.586418
13	1.22116	1.1573	1.2892	0.0289235	0.015789	0.039037		0.680871	0.497799	0.294508
13.3333	1.22943	1.16782	1.29435	0.0295623	0.0165451	0.0396238		1.13608	0.47122	0.278707
13.6667	1.2413	1.17829	1.29905	0.0300513	0.0172144	0.0402646		0.88621	0.438053	0.378343
14	1.25448	1.18661	1.30735	0.0311301	0.0179535	0.0402572		0.414168	0.506225	1.60476
14.3333	1.26652	1.19685	1.30818	0.03184	0.01821	0.0408666		0.435261	0.686489
14.6667	1.28279	1.20124	1.31291	0.0325705	0.0182655	0.0413391		0.361896	0.533866
15	1.29922	1.20688	1.32527	0.033266	0.0184676	0.0416016		0.449722
15.3333	1.31839	1.21184	1.32513	0.0342256	0.0182157	0.0422308		0.688578
15.6667	1.33509	1.21507	1.32568	0.0355709	0.0183217	0.0423237		0.75925
16	1.35686	1.21687	1.32922	0.0365429	0.018646	0.042482		0.965729
16.3333	1.37023	1.23072	1.33387	0.037733	0.0186646	0.0427114		1.13576
16.6667	1.38038	1.23293	1.34259	0.0389748	0.0188256	0.0428317
17	1.3945	1.23898	1.34869	0.0402168	0.0193488	0.0430414
17.3333	1.41015	1.23708	1.35515	0.0416795	0.019289	0.0432072
17.6667	1.42786	1.23542	1.35696	0.0431578	0.0205219	0.0432319
18	1.44304	1.24489	1.36183	0.0442563	0.0193255	0.0437008
18.3333	1.45183	1.24929	1.36687	0.0457078	0.0193686	0.0433246
18.6667	1.46442	1.25067	1.36312	0.0460612	0.0196078	0.0436042
19	1.47706	1.25359	1.36961	0.0470514	0.0198851	0.0439125
19.3333	1.48516	1.25611	1.37596	0.0470829	0.0200853	0.0441427
19.6667	1.49005	1.25953	1.37742	0.0472781	0.0200508	0.0439372
20	1.49595	1.26411	1.38238	0.0472641	0.0210282	0.0443401
20.3333	1.50703	1.2661	1.38316	0.0477049	0.0204327	0.0441594
20.6667	1.51238	1.26598	1.38866	0.0473962	0.0206716	0.0442957
21	1.52162	1.26857	1.38791	0.0479418	0.020901	0.0444185
21.3333	1.53153	1.26893	1.39277	0.0484056	0.0207732	0.0444402
21.6667	1.53192	1.27327	1.39392	0.0481725	0.0210431	0.0447708
22	1.53785	1.27583	1.39258	0.0483649	0.0212441	0.0444718
22.3333	1.53817	1.27734	1.40005	0.0481865	0.0213049	0.0448309
22.6667	1.54279	1.28043	1.40439	0.0480987	0.0215931	0.0443708
23	1.54976	1.28077	1.40983	0.0480227	0.0216729	0.0445803
23.3333	1.55034	1.28622	1.40656	0.0474743	0.0218674	0.0444435
23.6667	1.55714	1.28558	1.41208	0.0470874	0.021562	0.0448657
24	1.56058	1.28725	1.40828	0.0471357	0.0221015	0.0448659
24.3333	1.56175	1.2904	1.40637	0.0474216	0.0219023	0.0451032
24.6667	1.56728	1.28979	1.41013	0.0477088	0.0220358	0.0448314
25	1.56742	1.2942	1.41796	0.0468976	0.0225751	0.0446065
25.3333	1.57159	1.29489	1.42083	0.0472408	0.022425	0.0449161
25.6667	1.57606	1.29629	1.4167	0.0468437	0.0230172	0.0450447
26	1.57845	1.29554	1.42902	0.0468637	0.0225783	0.0450911
26.3333	1.57829	1.29661	1.432	0.0460608	0.0229432	0.0454501
26.6667	1.5822	1.29833	1.4298	0.0462264	0.022943	0.0450311
27	1.58195	1.30359	1.42603	0.0464731	0.0231498	0.0453999
27.3333	1.5832	1.3045	1.43114	0.0456386	0.0231365	0.0455321
27.6667	1.58767	1.30576	1.43878	0.0458981	0.0233918	0.0458051
28	1.58265	1.30575	1.44136	0.0455319	0.0235911	0.0457106
28.3333	1.58385	1.30651	1.44851	0.0455532	0.0235055	0.0457914
28.6667	1.59245	1.30927	1.44561	0.0460624	0.0236031	0.0462077
29	1.59597	1.3128	1.44874	0.0458559	0.0233291	0.0463089
29.3333	1.59663	1.31392	1.45581	0.046403	0.0234966	0.0466642
29.6667	1.60664	1.31659	1.45485	0.0470713	0.0233502	0.0482224
30	1.61621	1.31878	1.45701	0.047715	0.0234627	0.0486437
30.3333	1.61485	1.31847	1.46337	0.0477704	0.0232424	0.0476048
30.6667	1.62418	1.32216	1.46769	0.0490088	0.0235618	0.046694
31	1.62034	1.32893	1.45285	0.0487669	0.0241147	0.04868
31.3333	1.6335	1.3304	1.45097	0.0493244	0.023753	0.0489519
31.6667	1.63522	1.33232	1.45974	0.0501885	0.0242402	0.0508403
32	1.64012	1.33621	1.47387	0.0510099	0.0242812	0.0492144
32.3333	1.64264	1.3357	1.47101	0.0509446	0.0242644	0.0468985
32.6667	1.64359	1.33634	1.46924	0.0514586	0.0238923	0.0469814
33	1.65413	1.33889	1.47931	0.0530596	0.0246003	0.0474875
33.3333	1.66733	1.34111	1.48676	0.0543378	0.0248404	0.0477789
33.6667	1.66806	1.34235	1.49067	0.0545511	0.0246142	0.0482637
34	1.67525	1.34439	1.49086	0.0560226	0.0248731	0.0483149
34.3333	1.68746	1.34749	1.49204	0.0570131	0.0253923	0.0484154
34.6667	1.68862	1.3482	1.49598	0.0575063	0.0253315	0.0486986
35	1.69107	1.35038	1.49061	0.0575516	0.0255053	0.0488162
35.3333	1.69975	1.3511	1.4932	0.0582641	0.0254678	0.0486408
35.6667	1.70712	1.35316	1.49873	0.0590211	0.0255367	0.0485214
36	1.71161	1.35763	1.49951	0.0597819	0.0256287	0.0483094
36.3333	1.72166	1.35905	1.50599	0.0608063	0.0257553	0.0487735
36.6667	1.73774	1.36022	1.51375	0.063004	0.0255322	0.0487322
37	1.7482	1.365	1.51374	0.0642149	0.0261874	0.0484643
37.3333	1.75875	1.36679	1.50723	0.0652845	0.0257786	0.0481061
37.6667	1.75904	1.37085	1.51526	0.0661216	0.0262471	0.0485344
38	1.7677	1.37113	1.5223	0.0663656	0.026091	0.0485933
38.3333	1.7747	1.37584	1.52805	0.0670566	0.0266156	0.0492795
38.6667	1.77324	1.37467	1.52997	0.0674916	0.0262481	0.0493343
39	1.78172	1.37807	1.52928	0.0680043	0.0261189	0.0486164
39.3333	1.7818	1.37784	1.53335	0.0680026	0.0262809	0.0490153
39.6667	1.78845	1.38207	1.54127	0.0694201	0.0265862	0.0489038
40	1.79074	1.38723	1.54745	0.0692125	0.0268898	0.0497185
40.3333	1.79263	1.38714	1.54791	0.069094	0.0265812	0.0474488
40.6667	1.79603	1.38068	1.56428	0.0694293	0.0258076	0.0495082
41	1.79682	1.384	1.56103	0.0699119	0.0265852	0.0498512
41.3333	1.79858	1.38525	1.5564	0.0694796	0.0264536	0.0500182
41.6667	1.80547	1.38856	1.55341	0.0697065	0.0263348	0.0498972
42	1.80925	1.38963	1.55765	0.0699313	0.0263591	0.0505042
42.3333	1.81011	1.39537	1.56232	0.0694427	0.0267262	0.0505819
42.6667	1.80631	1.39595	1.56412	0.0689188	0.0266774	0.0506843
43	1.80613	1.39347	1.57127	0.0689038	0.0264695	0.0507649
43.3333	1.80665	1.3942	1.57183	0.0690991	0.0268788	0.0506457
43.6667	1.81517	1.39159	1.56934	0.0694073	0.026719	0.0502933
44	1.81173	1.39248	1.57794	0.06893	0.0268576	0.0504986
44.3333	1.80999	1.38523	1.5843	0.0687264	0.0257925	0.0505376
44.6667	1.80304	1.38646	1.59057	0.0678148	0.0264835	0.0507067
45	1.7898	1.38644	1.59718	0.0658257	0.0260373	0.050664
45.3333	1.7889	1.39118	1.6022	0.0647276	0.0256821	0.050602
45.6667	1.79019	1.38984	1.60241	0.0652046	0.0253991	0.0508049
46	1.78336	1.38956	1.60609	0.0640469	0.0257103	0.0505136
46.3333	1.789	1.39957	1.61566	0.0649722	0.0258257	0.0508959
46.6667	1.79066	1.40091	1.6254	0.0650278	0.0257854	0.0507144
47	1.79302	1.39792	1.62227	0.064954	0.026105	0.0511325
47.3333	1.78852	1.39765	1.62929	0.0651008	0.0258215	0.0509554
47.6667	1.77911	1.40276	1.63755	0.0646496	0.0262224	0.0514591
48	1.78175	1.40522	1.64823	0.0644687	0.0259412	0.0519434
48.3333	1.78109	1.40689	1.65171	0.0641885	0.0264933	0.0521484
48.6667	1.7828	1.40848	1.66127	0.0650092	0.026436	0.0524244
49	1.78578	1.41572	1.65862	0.0652679	0.0267724	0.0521938
49.3333	1.78461	1.41522	1.66703	0.0653125	0.0258754	0.0524887
49.6667	1.78454	1.42299	1.66667	0.0655701	0.0264712	0.0524412
50	1.79141	1.42605	1.67586	0.066233	0.0255273	0.0525811
50.3333	1.79119	1.42104	1.68906	0.066186	0.0248695	0.0536387
50.6667	1.79211	1.41655	1.68775	0.0666006	0.026601	0.0527403
51	1.79925	1.42105	1.70066	0.0661911	0.0241299	0.0524064
51.3333	1.8011	1.42311	1.70057	0.066381	0.0251888	0.0525329
51.6667	1.80387	1.42371	1.70474	0.0659241	0.0253973	0.0518107
52	1.80435	1.42654	1.71199	0.0667433	0.0261108	0.0529111
52.3333	1.81381	1.42589	1.71697	0.0665885	0.0258015	0.052214
52.6667	1.82166	1.42094	1.72367	0.0667571	0.0245687	0.0521617
53	1.82936	1.41523	1.72503	0.0671737	0.0238565	0.0520003
53.3333	1.83169	1.41534	1.72462	0.0678701	0.0242021	0.0528086
53.6667	1.83477	1.41692	1.73015	0.0680385	0.0246042	0.0532888
54	1.84257	1.41755	1.72982	0.0685672	0.0244706	0.0537915
54.3333	1.86413	1.41527	1.73933	0.0695817	0.0237143	0.0533224
54.6667	1.87837	1.41989	1.74607	0.0711371	0.0237293	0.0535593
55	1.88161	1.42532	1.74468	0.0717533	0.0243639	0.0535899
55.3333	1.8816	1.42583	1.75065	0.0714665	0.0244143	0.0525349
55.6667	1.87839	1.42467	1.74658	0.071356	0.0248568	0.051645
56	1.88075	1.42661	1.75351	0.0718791	0.0250208	0.0523498
56.3333	1.88785	1.42899	1.75996	0.0729481	0.0248636	0.0525528
56.6667	1.89416	1.42915	1.75702	0.073645	0.0254009	0.0522404
57	1.89865	1.42655	1.76	0.0736002	0.0259509	0.0524003
57.3333	1.90381	1.42772	1.76245	0.0750014	0.0266307	0.0524358
57.6667	1.9167	1.42997	1.76468	0.0755152	0.0261715	0.0520382
58	1.91923	1.43036	1.76859	0.0759778	0.0263872	0.052599
58.3333	1.92986	1.43457	1.76449	0.0762961	0.0265712	0.0521291
58.6667	1.93398	1.43409	1.77599	0.0772213	0.0266236	0.0523043
59	1.93797	1.43425	1.77761	0.078689	0.0270866	0.0522502
59.3333	1.9474	1.43525	1.77884	0.0784825	0.0273258	0.0520625
59.6667	1.95235	1.43451	1.78068	0.0784939	0.0275806	0.0516783
60	1.95357	1.43298	1.78614	0.0791329	0.0281175	0.0516515
60.3333	1.95689	1.42867	1.78915	0.0791683	0.0279378	0.0515767
60.6667	1.96135	1.42261	1.78996	0.0780137	0.0283232	0.0510307
61	1.9655	1.42676	1.79453	0.0784071	0.0286733	0.0509646
61.3333	1.96669	1.4251	1.79397	0.0780186	0.0281959	0.0508679
61.6667	1.9669	1.42616	1.79905	0.0778983	0.0279199	0.0510386
62	1.97375	1.42471	1.79474	0.0781705	0.0282772	0.050648
62.3333	1.97429	1.42233	1.7938	0.0779426	0.0278205	0.0502827
62.6667	1.97338	1.41773	1.79302	0.0775316	0.0275135	0.0503793
63	1.97063	1.41864	1.79861	0.0771197	0.0269965	0.050263
63.3333	1.97324	1.4192	1.79465	0.0761141	0.0274253	0.0496316
63.6667	1.97255	1.42171	1.79951	0.0758194	0.0277031	0.05036
64	1.97916	1.41717	1.80109	0.0752755	0.0276191	0.0501722
64.3333	1.98104	1.40885	1.79433	0.0746123	0.0272395	0.0498866
64.6667	1.98112	1.40841	1.79268	0.0742698	0.0276582	0.0495716
65	1.9849	1.40579	1.79462	0.0741263	0.027191	0.0497851

## Sheet: Source data Figure 6 D
Source data for Figure 6 D
F/F0 (mRuby) (Left)						Dot Plot (Right)
	Average		SEM			Individual Values
Time (min)	TKO + mRuby-GRAMD1b	TKO + mRuby-GRAMD1b (TM swap)	TKO + mRuby-GRAMD1b	TKO + mRuby-GRAMD1b (TM swap)		TKO + mRuby-GRAMD1b	TKO + mRuby-GRAMD1b (TM swap)
0	1.03137	0.99714	0.00910468	0.00850068		0.049953	0.18156
0.333333	1.03274	0.996953	0.00844989	0.00781223		-0.003888	0.228893
0.666667	1.02541	0.996888	0.00775209	0.00729366		0.462915	1.26228
1	1.01862	0.999325	0.00744961	0.00679397		0.923446	1.63423
1.33333	1.01692	1.00096	0.00627355	0.00539267		-0.139455	0.53606
1.66667	1.01496	1.00672	0.00664287	0.00522014		0.608024	0.275371
2	1.00768	1.00499	0.005653	0.00420306		0.814626	0.586524
2.33333	1.00146	1.00144	0.00472067	0.00308239		0.693109	0.547177
2.66667	1.01147	1.00102	0.00435473	0.00254963		0.031614	0.457985
3	1.00641	1.00251	0.00322231	0.00177855		0.223425	0.580842
3.33333	1.00254	1.00036	0.00249756	0.00152095		1.41909	1.37805
3.66667	0.993339	1.00126	0.00364069	0.00173784		0.439685	-0.005135
4	0.996505	0.999367	0.00259005	0.00139811		0.608869	0.822939
4.33333	0.996406	0.997896	0.00295689	0.00218893		-0.182297	0.691741
4.66667	0.993331	0.997578	0.00426487	0.00271661		0.349184	-0.104963
5	0.961474	0.986293	0.00533399	0.00429544		0.161623	0.45449
5.33333	0.94939	0.991159	0.0054872	0.00677228		0.575171	0.469005
5.66667	0.95671	1.01598	0.00671944	0.0137842		0.24544	0.470146
6	0.969621	1.03254	0.00823757	0.0193421		1.70034	0.238248
6.33333	0.9658	1.04653	0.00982473	0.0241143		2.02896	0.380561
6.66667	0.982245	1.05236	0.011356	0.0263243		-0.100311	1.39306
7	0.977091	1.0571	0.0119094	0.0282987		-0.066428	0.317184
7.33333	0.981525	1.06493	0.0128895	0.0285112		0.770849	1.2881
7.66667	0.989653	1.0837	0.0135868	0.0313585		0.636896	0.839438
8	0.995859	1.09144	0.0142611	0.0328899		0.967258	1.08098
8.33333	1.01573	1.10161	0.0163466	0.0342305		1.31952	0.591614
8.66667	1.0275	1.10562	0.019718	0.0354712		0.119322	0.484999
9	1.0474	1.11957	0.0225189	0.0378811		0.311485	0.13223
9.33333	1.04755	1.13974	0.024724	0.0383412		3.23587	0.155026
9.66667	1.06101	1.1546	0.0270422	0.0388495		0.50087	0.093613
10	1.0745	1.15881	0.0289544	0.0405159		0.878305	0.377483
10.3333	1.09337	1.1725	0.0303923	0.0412027		0.17048	0.420239
10.6667	1.11331	1.18686	0.0326387	0.0420083		0.231283	1.08582
11	1.13092	1.19213	0.0331093	0.0430829		1.16557	1.19713
11.3333	1.14691	1.20375	0.0344858	0.043645		1.03628	0.291026
11.6667	1.16057	1.21703	0.0357696	0.0449954		0.786269	0.639564
12	1.18251	1.22161	0.0391296	0.0447848		0.973972	0.340556
12.3333	1.19569	1.23204	0.0406259	0.0452881		1.0006	0.395436
12.6667	1.21187	1.2455	0.041741	0.0462905		0.868049	0.211261
13	1.22899	1.25044	0.0442268	0.0470412		1.32171	0.294508
13.3333	1.24726	1.25483	0.0442022	0.0482696		0.840364	0.278707
13.6667	1.25841	1.26268	0.0453754	0.049381		0.709869	0.378343
14	1.27771	1.27744	0.0465211	0.0500416		1.36207	1.60476
14.3333	1.28453	1.2819	0.0487993	0.0522122		0.986709
14.6667	1.29693	1.28935	0.0501928	0.0522218		0.728615
15	1.31147	1.29955	0.0520739	0.0538244		-0.034271
15.3333	1.32561	1.30441	0.05217	0.0543224		0.135764
15.6667	1.32633	1.30317	0.0512097	0.0528923
16	1.34341	1.3026	0.0531216	0.0534768
16.3333	1.36678	1.3071	0.0561067	0.0536732
16.6667	1.37222	1.32032	0.0550557	0.0553175
17	1.3963	1.32018	0.0557792	0.0566754
17.3333	1.38159	1.32478	0.058317	0.0559269
17.6667	1.39291	1.33308	0.0579869	0.0576293
18	1.41403	1.33658	0.057944	0.0570697
18.3333	1.42662	1.34633	0.0603889	0.0579163
18.6667	1.43488	1.34498	0.0611142	0.0585034
19	1.44501	1.35201	0.0611135	0.0596004
19.3333	1.45478	1.35326	0.0628549	0.0608041
19.6667	1.45624	1.36014	0.0623524	0.0609517
20	1.47128	1.35908	0.0642275	0.0612671
20.3333	1.47092	1.35385	0.0633047	0.0614059
20.6667	1.47975	1.36107	0.0644582	0.0619664
21	1.48244	1.35683	0.0632775	0.0613659
21.3333	1.48409	1.35726	0.0635371	0.061521
21.6667	1.48964	1.35783	0.0623634	0.0608892
22	1.49649	1.35757	0.0627382	0.0606939
22.3333	1.50786	1.36207	0.0635322	0.0613824
22.6667	1.5079	1.3694	0.0630174	0.062819
23	1.51146	1.36367	0.0632473	0.0623956
23.3333	1.51618	1.36217	0.0636701	0.0624897
23.6667	1.52509	1.36344	0.0636817	0.0631161
24	1.5295	1.35881	0.0642318	0.0627725
24.3333	1.53433	1.35487	0.0647351	0.0619071
24.6667	1.53108	1.35269	0.0644193	0.0621939
25	1.53663	1.36296	0.0647589	0.0625918
25.3333	1.54796	1.36077	0.0645543	0.0627662
25.6667	1.54668	1.3599	0.0641845	0.0638531
26	1.54686	1.36423	0.0645762	0.0641056
26.3333	1.54364	1.36242	0.0647578	0.0628924
26.6667	1.54841	1.36055	0.0641343	0.0630178
27	1.5607	1.35436	0.0654962	0.0620407
27.3333	1.56618	1.3625	0.0644392	0.0636601
27.6667	1.56011	1.36466	0.0655588	0.0636197
28	1.55931	1.36315	0.064512	0.0629119
28.3333	1.56749	1.35936	0.0656703	0.0633794
28.6667	1.56971	1.36215	0.0662594	0.0626227
29	1.57885	1.36653	0.0671485	0.0630875
29.3333	1.58037	1.37486	0.0667279	0.0636398
29.6667	1.58133	1.37743	0.0667498	0.0641625
30	1.58936	1.36556	0.0667465	0.0614743
30.3333	1.59536	1.36465	0.0674661	0.0590795
30.6667	1.60044	1.36247	0.0671238	0.0616827
31	1.60147	1.34618	0.0672582	0.0567222
31.3333	1.608	1.35072	0.0662703	0.0601636
31.6667	1.61517	1.35306	0.0672738	0.0622683
32	1.61018	1.35494	0.0671495	0.0626727
32.3333	1.60449	1.37956	0.0658559	0.0603803
32.6667	1.60841	1.36953	0.0661314	0.0586492
33	1.61406	1.38103	0.0665188	0.0582766
33.3333	1.61698	1.38393	0.0665216	0.0574455
33.6667	1.61734	1.38101	0.0655499	0.0568907
34	1.61483	1.37972	0.0653655	0.0564436
34.3333	1.6195	1.3857	0.0650197	0.0564861
34.6667	1.61843	1.38703	0.0647411	0.0566155
35	1.61956	1.38525	0.0637672	0.0559611
35.3333	1.63534	1.38982	0.0657152	0.0555694
35.6667	1.6313	1.39155	0.0649495	0.0545438
36	1.63177	1.39659	0.0659479	0.0561335
36.3333	1.63772	1.40094	0.0668548	0.0559849
36.6667	1.6456	1.40535	0.0684337	0.0561459
37	1.64772	1.3988	0.0686404	0.0556271
37.3333	1.65611	1.3942	0.0695698	0.0547774
37.6667	1.64937	1.39873	0.0699019	0.0558244
38	1.64648	1.40175	0.0693633	0.0556805
38.3333	1.64731	1.40696	0.0674095	0.0556238
38.6667	1.65159	1.41015	0.0685689	0.0559604
39	1.65679	1.41262	0.0697239	0.0556978
39.3333	1.65589	1.41419	0.0707701	0.0561144
39.6667	1.66059	1.41936	0.0703024	0.0561502
40	1.66634	1.42314	0.0709595	0.0567994
40.3333	1.66117	1.42615	0.0696905	0.0541935
40.6667	1.65707	1.44168	0.0702724	0.0566221
41	1.65749	1.4316	0.0705983	0.0562343
41.3333	1.6605	1.4228	0.0716265	0.0564866
41.6667	1.66291	1.42221	0.0730496	0.0556633
42	1.66096	1.42298	0.0734304	0.0562493
42.3333	1.66325	1.42953	0.0736517	0.0564738
42.6667	1.65783	1.42538	0.0729804	0.0559946
43	1.66315	1.425	0.0740097	0.0561573
43.3333	1.6636	1.4264	0.0740204	0.0560508
43.6667	1.66014	1.43232	0.072823	0.0560978
44	1.66038	1.43447	0.0738223	0.0556877
44.3333	1.65715	1.44068	0.0756856	0.0557169
44.6667	1.65987	1.44807	0.0761923	0.056396
45	1.66104	1.44757	0.0772149	0.0571782
45.3333	1.66131	1.45753	0.0770006	0.0572983
45.6667	1.66283	1.44986	0.0786416	0.0576121
46	1.66292	1.45686	0.0778273	0.0573625
46.3333	1.66628	1.46276	0.0788769	0.0575621
46.6667	1.67618	1.46014	0.0793115	0.0575101
47	1.6755	1.46048	0.0789965	0.0579231
47.3333	1.68449	1.46359	0.0811101	0.0576835
47.6667	1.69549	1.47052	0.0835514	0.0574206
48	1.69651	1.46916	0.082475	0.0580084
48.3333	1.69401	1.47413	0.0814207	0.0581587
48.6667	1.69872	1.48057	0.0829809	0.0582788
49	1.70326	1.48113	0.0845479	0.0576669
49.3333	1.70887	1.48894	0.085101	0.0587971
49.6667	1.71717	1.48603	0.0847703	0.0582722
50	1.73654	1.49942	0.0863023	0.0591861
50.3333	1.70914	1.50574	0.0861735	0.0592495
50.6667	1.71006	1.49946	0.0846271	0.0593577
51	1.7127	1.50917	0.0834354	0.0601145
51.3333	1.7073	1.5128	0.0842294	0.0595138
51.6667	1.71077	1.51739	0.0839733	0.0607566
52	1.70189	1.51168	0.083923	0.0595637
52.3333	1.70277	1.52092	0.0853695	0.0609721
52.6667	1.69412	1.53434	0.0835948	0.063124
53	1.68586	1.54323	0.0824957	0.0637601
53.3333	1.69192	1.53556	0.0856123	0.0628434
53.6667	1.69353	1.53338	0.084336	0.06152
54	1.6947	1.5342	0.0840211	0.0612149
54.3333	1.69648	1.53719	0.0840407	0.0604952
54.6667	1.70742	1.54813	0.0839982	0.0633691
55	1.71733	1.54015	0.0856356	0.0605281
55.3333	1.71464	1.54315	0.0841583	0.0614277
55.6667	1.70686	1.54394	0.0863105	0.061019
56	1.71583	1.54522	0.0861322	0.0610919
56.3333	1.72188	1.54805	0.0883012	0.0607521
56.6667	1.71173	1.54915	0.0874647	0.0615136
57	1.71269	1.54919	0.0870871	0.0612099
57.3333	1.71793	1.55619	0.0887943	0.0616883
57.6667	1.71707	1.5561	0.0897235	0.0621121
58	1.72624	1.55428	0.090627	0.0609173
58.3333	1.72941	1.562	0.0898644	0.0617413
58.6667	1.72701	1.55969	0.0895482	0.061941
59	1.7171	1.56253	0.0903399	0.0619784
59.3333	1.71694	1.5584	0.0897821	0.0615504
59.6667	1.72004	1.56254	0.0915321	0.0613244
60	1.71838	1.56566	0.091825	0.0623256
60.3333	1.71783	1.56513	0.0898001	0.0624584
60.6667	1.72422	1.57024	0.0921386	0.0617498
61	1.70543	1.57397	0.0896042	0.0620859
61.3333	1.71367	1.57028	0.0905157	0.061918
61.6667	1.71352	1.57045	0.092548	0.0617546
62	1.72321	1.57061	0.0917414	0.0621746
62.3333	1.7195	1.56717	0.0911581	0.0620981
62.6667	1.71754	1.57627	0.091755	0.0631829
63	1.71283	1.57423	0.0920146	0.0633785
63.3333	1.71572	1.57262	0.0923317	0.0632119
63.6667	1.71614	1.57488	0.0928771	0.0637149
64	1.7078	1.57426	0.0911646	0.0641804
64.3333	1.71228	1.57395	0.0930098	0.0647521
64.6667	1.70906	1.57342	0.093764	0.0651184
65	1.7059	1.58086	0.0938542	0.0663656
