# Supplementary material for: Movement of accessible plasma membrane cholesterol by the GRAMD1 lipid transfer protein complex
Source: eLife. 2019 Nov 14;8:e51401. doi: 10.7554/eLife.51401 (PMC6905856; doi:10.7554/eLife.51401)
Supplement: Figure 6—figure supplement 2—source data 1. [file elife-51401-fig6-figsupp2-data1.xlsx]

## Sheet: Source data Figure 6-S-2 B
Source data for Figure 6-figure supplement 2 B
DIntensity/Intensity0 (EGFP-D4)
min	Control					TKO
0	0	0	0	0	0	0	0	0	0	0
30	0.661985	0.850318	0.485616	0.536497	0.951548	0.647103	0.535417	0.587523	0.513609	0.885735
60	0.140462	0.726154	0.313473	0.393692	0.631262	0.561672	0.461858	0.551767	0.513945	0.63411
90	0.451296	0.840085	0.409857	0.401422	0.546921	1.06526	0.714257	0.765893	0.3127	0.195808
120	0.415303	1.07109	0.449126	0.579521	0.480687	1.06966	0.736146	1.03962	0.354047	0.72685
150	0.182223	0.721642	0.321357	0.11811	0.576135	1.21886	0.44576	1.87402	0.330297	1.09608
180	0.106102	0.730354	0.078187	0.456145	0.694971	1.03774	0.837718	0.849458	0.576615	1.48496
