# Supplementary material for: Movement of accessible plasma membrane cholesterol by the GRAMD1 lipid transfer protein complex
Source: eLife. 2019 Nov 14;8:e51401. doi: 10.7554/eLife.51401 (PMC6905856; doi:10.7554/eLife.51401)
Supplement: Figure 6—source data 1. [file elife-51401-fig6-data1.xlsx]

## Sheet: Source data Figure 6 A
Source data for Figure 6 A
F/F0 (EGFP) (Left)
	Average	SEM
Time (min)	EGFP-GRAMD1b	EGFP-GRAMD1b
0	0.990156	0.00530399
0.333333	0.996413	0.0049736
0.666667	0.99127	0.00441541
1	0.988353	0.00407833
1.33333	0.995009	0.00369452
1.66667	1.00165	0.00304555
2	1.00343	0.0027439
2.33333	1.00147	0.00245904
2.66667	1.00122	0.00227048
3	0.999379	0.00190081
3.33333	0.997997	0.00168676
3.66667	0.998499	0.00148504
4	1.00708	0.00201105
4.33333	1.01053	0.00236651
4.66667	0.993094	0.00542937
5	0.968504	0.00582004
5.33333	0.97241	0.00594185
5.66667	0.977724	0.00640902
6	0.986634	0.00723852
6.33333	0.993814	0.00801898
6.66667	0.999433	0.00887667
7	1.00245	0.00930987
7.33333	1.0001	0.00959262
7.66667	1.01512	0.0100232
8	1.01232	0.0102577
8.33333	1.01688	0.0103612
8.66667	1.02125	0.010655
9	1.02753	0.0112026
9.33333	1.03876	0.0121474
9.66667	1.04988	0.0136244
10	1.06114	0.0160763
10.3333	1.07192	0.0186005
10.6667	1.08338	0.0208243
11	1.10022	0.0226232
11.3333	1.11092	0.0245949
11.6667	1.11946	0.0264163
12	1.13021	0.0272843
12.3333	1.13646	0.0287061
12.6667	1.14333	0.0291492
13	1.15073	0.0294044
13.3333	1.15642	0.0297166
13.6667	1.16743	0.0303744
14	1.17072	0.0312496
14.3333	1.17783	0.031368
14.6667	1.18165	0.0320766
15	1.18272	0.032325
15.3333	1.18807	0.0324929
15.6667	1.19483	0.0331186
16	1.19899	0.0328571
16.3333	1.20288	0.0325529
16.6667	1.20844	0.0332815
17	1.20968	0.032974
17.3333	1.21276	0.0325989
17.6667	1.21324	0.0322714
18	1.22308	0.0327631
18.3333	1.2225	0.0328617
18.6667	1.22958	0.0324801
19	1.23172	0.032655
19.3333	1.23154	0.0326944
19.6667	1.23488	0.0326592
20	1.23509	0.0323313
20.3333	1.23742	0.0320845
20.6667	1.2384	0.032074
21	1.23889	0.0323783
21.3333	1.24309	0.0320955
21.6667	1.24137	0.0323653
22	1.25045	0.0328771
22.3333	1.25421	0.0326522
22.6667	1.25204	0.0327045
23	1.25145	0.0325464
23.3333	1.25452	0.0326462
23.6667	1.26007	0.03224
24	1.26282	0.0326224
24.3333	1.26733	0.032846
24.6667	1.26508	0.0327158
25	1.27169	0.0330838
25.3333	1.27989	0.0335172
25.6667	1.28595	0.0333684
26	1.28217	0.0342528
26.3333	1.29223	0.0345264
26.6667	1.29945	0.0347175
27	1.29647	0.034909
27.3333	1.29995	0.034696
27.6667	1.29742	0.0347839
28	1.30413	0.0348398
28.3333	1.30807	0.0351334
28.6667	1.30987	0.0345644
29	1.31174	0.0348129
29.3333	1.32183	0.035261
29.6667	1.32614	0.0351254
30	1.32961	0.035589
30.3333	1.33481	0.0357848
30.6667	1.33494	0.0359232
31	1.34138	0.0363477
31.3333	1.34598	0.0368075
31.6667	1.35144	0.0364899
32	1.35361	0.0370262
32.3333	1.36094	0.0370057
32.6667	1.36445	0.0367362
33	1.36419	0.0369005
33.3333	1.36626	0.0373908
33.6667	1.36772	0.0374569
34	1.37108	0.0379713
34.3333	1.37582	0.0407219
34.6667	1.37307	0.0378469
35	1.3761	0.0381243
35.3333	1.37703	0.0384501
35.6667	1.3802	0.0387055
36	1.38236	0.039037
36.3333	1.39181	0.0397396
36.6667	1.39438	0.0397861
37	1.39961	0.0396574
37.3333	1.40185	0.0393111
37.6667	1.41139	0.0399267
38	1.41787	0.0401417
38.3333	1.42888	0.0407635
38.6667	1.41701	0.0397075
39	1.43091	0.0408679
39.3333	1.43222	0.0410631
39.6667	1.43311	0.0407781
40	1.44496	0.041653
40.3333	1.44601	0.0418285
40.6667	1.44433	0.0418649
41	1.44331	0.0423586
41.3333	1.43894	0.0420482
41.6667	1.4439	0.0422417
42	1.44891	0.0429687
42.3333	1.44635	0.0419551
42.6667	1.45311	0.0425342
43	1.45315	0.0427654
43.3333	1.45504	0.0432313
43.6667	1.46079	0.043497
44	1.4596	0.0436588
44.3333	1.46674	0.0438565
44.6667	1.46887	0.0440513
45	1.47167	0.0441689
45.3333	1.47406	0.0443838
45.6667	1.47871	0.0446933
46	1.48536	0.0453719
46.3333	1.4927	0.0450816
46.6667	1.49289	0.0441025
47	1.49217	0.044466
47.3333	1.49021	0.0443704
47.6667	1.49233	0.044398
48	1.49921	0.0445379
48.3333	1.50085	0.0439356
48.6667	1.50618	0.0451005
49	1.51206	0.045283
49.3333	1.51402	0.0454821
49.6667	1.51354	0.0452827
50	1.51456	0.045497
50.3333	1.51773	0.0452114
50.6667	1.519	0.0454743
51	1.52477	0.0456254
51.3333	1.53609	0.0457812
51.6667	1.53482	0.045651
52	1.53535	0.0456561
52.3333	1.53575	0.0456498
52.6667	1.53776	0.04599
53	1.5516	0.0467445
53.3333	1.5494	0.0467632
53.6667	1.55447	0.0468502
54	1.55402	0.0465367
54.3333	1.55844	0.0466721
54.6667	1.55917	0.0469155
55	1.56621	0.0470111
55.3333	1.57102	0.0469471
55.6667	1.57336	0.0473106
56	1.57715	0.0477857
56.3333	1.577	0.0475378
56.6667	1.58246	0.0478565
57	1.58135	0.04798
57.3333	1.58695	0.0480564
57.6667	1.58772	0.0484543
58	1.586	0.0483889
58.3333	1.58694	0.0483826
58.6667	1.5845	0.0485793
59	1.58638	0.0489743
59.3333	1.59077	0.0491657
59.6667	1.5889	0.049503
60	1.59217	0.049884
60.3333	1.59575	0.0501699
60.6667	1.59672	0.0506578
61	1.59621	0.0508433
61.3333	1.60326	0.0508306
61.6667	1.60999	0.0513863
62	1.60273	0.0515204
62.3333	1.60474	0.0518543
62.6667	1.60517	0.0520819
63	1.61092	0.052502
63.3333	1.61299	0.053334
63.6667	1.61726	0.0528736
64	1.62689	0.0535339
64.3333	1.62716	0.053711
64.6667	1.63197	0.0534438
65	1.6346	0.0536926
65.3333	1.63756	0.0542918
65.6667	1.6456	0.0551009
66	1.64919	0.0557129
66.3333	1.64784	0.0550484
66.6667	1.65458	0.0558197
67	1.66146	0.05598
67.3333	1.66603	0.0562743
67.6667	1.66827	0.0568811
68	1.66372	0.0563211
68.3333	1.66787	0.0575556
68.6667	1.67094	0.0577347
69	1.67508	0.058553
69.3333	1.68489	0.0590155
69.6667	1.68585	0.0593028
70	1.68994	0.0590693
70.3333	1.69503	0.0598848
70.6667	1.69926	0.0600138
71	1.70521	0.0609966
71.3333	1.70578	0.0607151
71.6667	1.70784	0.0615496
72	1.71126	0.0615993
72.3333	1.72341	0.0623269
72.6667	1.72936	0.0631098
73	1.73023	0.0628793
73.3333	1.73417	0.0632303
73.6667	1.73924	0.0636864
74	1.74825	0.0638773
74.3333	1.74582	0.0642112
74.6667	1.75228	0.0651141
75	1.7528	0.0654165
75.3333	1.75901	0.0655626
75.6667	1.75992	0.0656877
76	1.76364	0.065514
76.3333	1.76774	0.0664818
76.6667	1.77069	0.0668794
77	1.76691	0.0667341
77.3333	1.76605	0.0672486
77.6667	1.767	0.0668466
78	1.76253	0.067329
78.3333	1.76856	0.0673625
78.6667	1.76992	0.0678385
79	1.76988	0.0683482
79.3333	1.77262	0.0683858
79.6667	1.77074	0.0677717
80	1.76276	0.0680876
80.3333	1.76221	0.0683935
80.6667	1.76118	0.068435
81	1.76339	0.0689772
81.3333	1.77111	0.0691673
81.6667	1.76993	0.0705023
82	1.7694	0.0699544
82.3333	1.77173	0.0696956
82.6667	1.76847	0.0692868
83	1.7724	0.0698481
83.3333	1.7687	0.0703154
83.6667	1.77416	0.0702775
84	1.77365	0.0701312
84.3333	1.77497	0.070684
84.6667	1.78396	0.0707832
85	1.78527	0.0710952
85.3333	1.79111	0.0715156
85.6667	1.78937	0.0724194
86	1.78353	0.0722087
86.3333	1.77978	0.0722236
86.6667	1.77942	0.0717746
87	1.78537	0.0723454
87.3333	1.78786	0.0732128
87.6667	1.78962	0.0727529
88	1.80041	0.0736757
88.3333	1.80721	0.0742978
88.6667	1.80177	0.0731534
89	1.80622	0.0733544
89.3333	1.80824	0.0740377
89.6667	1.81436	0.0743157
90	1.81355	0.0743648
90.3333	1.82269	0.0751378
90.6667	1.82533	0.0752264
91	1.81998	0.074845
91.3333	1.81961	0.0748206
91.6667	1.82186	0.0752828
92	1.81832	0.0752564
92.3333	1.81799	0.0752026
92.6667	1.8282	0.075997
93	1.83341	0.0756404
93.3333	1.83835	0.0761648
93.6667	1.83485	0.0760704
94	1.8298	0.0763299
94.3333	1.82929	0.0765662
94.6667	1.82725	0.0762447
95	1.82994	0.0764622
95.3333	1.8331	0.0761472
95.6667	1.82903	0.0768538
96	1.83518	0.0767089
96.3333	1.83361	0.0767984
96.6667	1.83336	0.0772377
97	1.83129	0.0770142
97.3333	1.83958	0.0768201
97.6667	1.84049	0.0768655
98	1.84355	0.0774443
98.3333	1.84601	0.0774019
98.6667	1.85097	0.0775793
99	1.86078	0.0780275
99.3333	1.8603	0.0778881
99.6667	1.85473	0.0772336
100	1.85863	0.077805
100.333	1.86209	0.0773342
100.667	1.86005	0.0775594
101	1.86394	0.0777058
101.333	1.86553	0.0781242
101.667	1.86974	0.0779023
102	1.87199	0.0777898
102.333	1.87485	0.078232
102.667	1.87712	0.077905
103	1.88011	0.0777144
103.333	1.87506	0.0776666
103.667	1.87522	0.0774849
104	1.87448	0.0778693
104.333	1.88336	0.0784147
104.667	1.88545	0.078111
105	1.8873	0.0783006
105.333	1.89679	0.0788401
105.667	1.8966	0.0787478
106	1.89906	0.07977
106.333	1.89787	0.079096
106.667	1.89482	0.0792326
107	1.88765	0.0786392
107.333	1.89136	0.0792165
107.667	1.88945	0.0790624
108	1.89643	0.0798536
108.333	1.9	0.0793791
108.667	1.90058	0.0796843
109	1.90293	0.0798072
109.333	1.8959	0.0799705
109.667	1.89373	0.079997
110	1.89466	0.0800481
110.333	1.89556	0.0795208
110.667	1.90274	0.0797087
111	1.89868	0.0796117
111.333	1.90586	0.0802553
111.667	1.90557	0.0802787
112	1.90154	0.0797261
112.333	1.89953	0.079858
112.667	1.89518	0.0799132
113	1.89673	0.0794702
113.333	1.89539	0.0792117
113.667	1.88912	0.0796903
114	1.88682	0.0798198
114.333	1.89224	0.0801559
114.667	1.89004	0.0798471
115	1.88824	0.0797247
115.333	1.88978	0.0797096
115.667	1.88468	0.0793041
116	1.88285	0.0791488
116.333	1.89265	0.0799197
116.667	1.89293	0.0803298
117	1.89347	0.0801464
117.333	1.88923	0.0805255
117.667	1.8899	0.0804095
118	1.88433	0.0802109
118.333	1.88445	0.0802801
118.667	1.88761	0.0808912
119	1.89153	0.080569
119.333	1.89366	0.0802263
119.667	1.89622	0.0805826
120	1.88997	0.080206
120.333	1.88838	0.0803943
120.667	1.88785	0.0799807
121	1.89137	0.0801418
121.333	1.89143	0.080262
121.667	1.89134	0.0800752
122	1.89345	0.0807211
122.333	1.89326	0.0801684
122.667	1.88584	0.0797765
123	1.88952	0.0800762
123.333	1.88558	0.0803949
123.667	1.88183	0.0799806
124	1.87932	0.0793494
124.333	1.88654	0.0794159
124.667	1.89164	0.0804378
125	1.88626	0.0803166
125.333	1.89151	0.0801877
125.667	1.88608	0.0805087
126	1.87844	0.0797454
126.333	1.87755	0.079933
126.667	1.87519	0.0799969
127	1.87618	0.0804965
127.333	1.87517	0.079865
127.667	1.87386	0.0799746
128	1.86941	0.0792764
128.333	1.86871	0.0791957
128.667	1.86872	0.0791755
129	1.86873	0.0789401
129.333	1.86875	0.0795664
129.667	1.86415	0.0795946
130	1.86573	0.0793909
130.333	1.86229	0.0792612
130.667	1.86613	0.0794398
131	1.86298	0.0797558
131.333	1.87262	0.0803035
131.667	1.8776	0.0806376
132	1.87201	0.0806924
132.333	1.87822	0.0809941
132.667	1.88153	0.0812449
133	1.8862	0.0812586
133.333	1.8836	0.0816034
133.667	1.88626	0.0812659
134	1.88831	0.0813555
134.333	1.88919	0.0815518
134.667	1.89724	0.0817117
135	1.90341	0.0820087
135.333	1.91303	0.0824637
135.667	1.91552	0.0829725
136	1.91601	0.0822592
136.333	1.91033	0.0815864
136.667	1.9197	0.0828537
137	1.92273	0.0832817
137.333	1.92582	0.0833389
137.667	1.92663	0.0829712
138	1.92935	0.0834491
138.333	1.92728	0.0833659
138.667	1.92399	0.0836019
139	1.93167	0.0835288
139.333	1.92622	0.0838098
139.667	1.9171	0.0833186
140	1.91841	0.0835197
140.333	1.9268	0.0841714
140.667	1.92826	0.0844874
141	1.9287	0.0842368
141.333	1.92982	0.0849326
141.667	1.93378	0.0852156
142	1.92917	0.0847319
142.333	1.92638	0.0845251
142.667	1.92601	0.0846231
143	1.92618	0.0842412
143.333	1.92914	0.0841236
143.667	1.93493	0.0846432
144	1.93532	0.0848291
144.333	1.92882	0.0856721
144.667	1.92834	0.0849981
145	1.92732	0.0849552
145.333	1.92618	0.0849533
145.667	1.91566	0.0847846
146	1.91924	0.0850671
146.333	1.91425	0.0850498
146.667	1.91074	0.0843182
147	1.90139	0.0842251
147.333	1.89914	0.0839775
147.667	1.89733	0.0836154
148	1.89399	0.0834558
148.333	1.89461	0.0842759
148.667	1.88784	0.0835572
149	1.89111	0.0839368
149.333	1.89052	0.0839796
149.667	1.88784	0.0838747
150	1.88323	0.0839262
150.333	1.88288	0.0839111
150.667	1.88077	0.0836309
151	1.87885	0.0836811
151.333	1.88014	0.0839516
151.667	1.88228	0.0842546
152	1.87993	0.0834774
152.333	1.87934	0.083738
152.667	1.87974	0.0837692
153	1.88394	0.0839892
153.333	1.88551	0.0840371
153.667	1.89151	0.0842518
154	1.89142	0.08467
154.333	1.89856	0.0844864
154.667	1.90347	0.0846893
155	1.90403	0.0847882
155.333	1.90341	0.0841072
155.667	1.90974	0.0849803
156	1.90876	0.0848611
156.333	1.91345	0.0849994
156.667	1.91763	0.0855236
157	1.9235	0.0856161
157.333	1.92425	0.0852255
157.667	1.92201	0.0853149
158	1.93129	0.0859647
158.333	1.93234	0.0859629
158.667	1.93587	0.0861701
159	1.9379	0.0866484
159.333	1.94118	0.0871351
159.667	1.94341	0.0874937
160	1.94203	0.0874221
160.333	1.94831	0.0878448
160.667	1.94824	0.0883348
161	1.94586	0.0884308
161.333	1.94844	0.0885254
161.667	1.95618	0.0887004
162	1.95452	0.0887984
162.333	1.9543	0.0892384
162.667	1.95762	0.0895177
163	1.95661	0.0893057
163.333	1.96092	0.0896052
163.667	1.95849	0.0895693
164	1.9588	0.0900017
164.333	1.96282	0.0900886
164.667	1.96272	0.0903576
165	1.96266	0.0902772
165.333	1.96633	0.090377
165.667	1.96981	0.0906453
166	1.97156	0.0910848
166.333	1.97215	0.0912907
166.667	1.96936	0.0914954
167	1.96695	0.0913621
167.333	1.96638	0.0912608
167.667	1.96551	0.0913467
168	1.96557	0.091512
168.333	1.96613	0.0918883
168.667	1.96859	0.0919078
169	1.96755	0.0921528
169.333	1.96611	0.0919112
169.667	1.96925	0.0927773
170	1.97409	0.0929201
170.333	1.97673	0.0931298
170.667	1.97512	0.0937509
171	1.97479	0.0941464
171.333	1.9743	0.0944377
171.667	1.96977	0.0940328
172	1.97274	0.0940749
172.333	1.97008	0.0938995
172.667	1.96975	0.0940374
173	1.97528	0.094814
173.333	1.97765	0.0953629
173.667	1.97894	0.0955696
174	1.97688	0.0955974
174.333	1.97992	0.0961782
174.667	1.98349	0.096261
175	1.98651	0.0964024
175.333	1.98465	0.0968771
175.667	1.98638	0.0968653
176	1.98204	0.0966216
176.333	1.98242	0.0965957
176.667	1.98706	0.0970606
177	1.98795	0.0971527
177.333	1.98684	0.0971636
177.667	1.9855	0.0971381
178	1.98571	0.0969953
178.333	1.99333	0.0972624
178.667	1.99001	0.0975192
179	1.9877	0.0974149
179.333	1.98931	0.0974871
179.667	1.99334	0.097695
180	1.99192	0.098339
180.333	1.99599	0.0983785
180.667	1.99515	0.0984212
181	2.00099	0.0985118
181.333	1.99796	0.097962
181.667	2.00586	0.0989537
182	2.00641	0.0993321
182.333	2.0066	0.0993068
182.667	2.00304	0.0989926
183	2.00057	0.0987421
183.333	2.00041	0.0991449
183.667	2.00545	0.0999569
184	2.00449	0.100078
184.333	2.0061	0.100779
184.667	2.00659	0.100819
185	2.00887	0.100832

## Sheet: Source data Figure 6 C,D,E
Source data for Figure 6 C
Response rate (ratio)
min	Control					TKO
0	1	1	1	1	1	1	1	1	1	1
30	0.663866	0.758587	0.602557	0.954947	0.827316	0.629729	0.931706	0.70818	0.760895	0.648015
60	0.727909	0.473152	0.534594	0.45684	0.387753	0.596125	0.579148	0.559061	0.451665	0.394759
90	0.350695	0.407269	0.249155	0.274102	0.231412	0.3545	0.646728	0.335959	0.466085	0.422347
120	0.399186	0.333114	0.240348	0.383433	0.221882	0.382886	0.483599	0.440566	0.467761	0.45638
150	0.328928	0.319447	0.195607	0.372982	0.198456	0.4351	0.699893	0.393872	0.619541	0.57263
180	0.359674	0.294329	0.134063	0.511283	0.328107	0.575653	0.69095	0.76403	0.712747	0.864138
Source data for Figure 6 D
Response rate (ratio)
	Control	TKO	TKO + GRAMD1b	TKO + GRAMD1b (5P)	TKO + GRAMD1b (ΔGRAM)
Replicate 1	0.165796	0.73344	0.353922	0.559732	0.463575
Replicate 2	0.140501	0.461833	0.370906	0.674946	1.01188
Replicate 3	0.152061	0.657577	0.349593	0.466598	0.614504
Replicate 4	0.116296	0.771893	0.537193	0.614045	0.525186
Replicate 5	0.496043	0.583397	0.407043	0.446283	0.565851
Replicate 6	0.446435	0.526361	0.327529	0.425098	0.64818
Source data for Figure 6 E
Response rate (ratio)
	Control	TKO	TKO + GRAMD1b	TKO + GRAMD1b (TM swap)
Replicate 1	0.316756	0.580696	0.234354	0.379836
Replicate 2	0.149318	0.5518	0.328133	0.520053
Replicate 3	0.21514	0.620686	0.389824	0.499572
Replicate 4	0.289493	0.506929	0.195018	0.42846
Replicate 5	0.214167	0.482474	0.255331	0.359239

## Sheet: Source data Figure 6 G
Source data for Figure 6 G
F/F0 (EGFP) (Left)						Dot Plot (Right)
	Average		SEM			Individual Values
Time (min)	EGFP-GRAMD1b	EGFP-GRAMD1b (TM swap)	EGFP-GRAMD1b	EGFP-GRAMD1b (TM swap)		GRAMD1b	GRAMD1b (TM swap)
0	0.995335	0.972465	0.0184422	0.015653		0.343779	0.867305
0.333333	0.99488	0.971672	0.0165429	0.015151		0.647321	0.71942
0.666667	0.992059	0.973071	0.0155765	0.0143415		0.465439	0.452788
1	0.991844	0.977564	0.0142355	0.0131818		1.46406	0.400396
1.33333	0.998946	0.978003	0.0134234	0.0126316		-0.015613	0.819084
1.66667	0.995488	0.981835	0.0128003	0.0119118		0.09119	0.635571
2	0.994973	0.986059	0.0119534	0.0110641		0.380174	0.728815
2.33333	0.993617	0.98901	0.0113459	0.0102818		0.262932	-0.380149
2.66667	0.997766	0.991709	0.0109117	0.00973551		1.14176	-0.164917
3	0.995601	0.993471	0.00987558	0.00927874		0.654604	-0.062011
3.33333	1.00298	0.996969	0.00962052	0.00846506		0.415843	0.165328
3.66667	0.999496	1.00188	0.00928505	0.00820459		0.490578	0.292521
4	0.997444	1.00432	0.00854357	0.00758074		0.411489	0.316282
4.33333	1.00338	1.00556	0.00769634	0.00713729		0.570118	0.287009
4.66667	1.00333	1.0061	0.00693741	0.00630355		0.576667	0.208677
5	0.983715	0.980113	0.00639228	0.00615885		0.789777	-0.137059
5.33333	0.974855	0.973629	0.00522569	0.00525258		0.217637	-0.141103
5.66667	0.976584	0.978978	0.00506884	0.00460345		1.07272	-0.32862
6	0.978374	0.998105	0.00429048	0.00389664		0.537058	-0.28568
6.33333	0.982752	1.01002	0.00443318	0.00391291		1.80936	0.550303
6.66667	0.984401	1.01956	0.0038136	0.00372164		-0.097873	0.404236
7	0.985143	1.03092	0.00351533	0.0026928		-0.26832	0.190828
7.33333	0.979814	1.03888	0.00312263	0.00221019		0.002	-0.142812
7.66667	0.982532	1.04924	0.00231361	0.00201535		0.486436	-0.332946
8	0.977273	1.05774	0.00202838	0.00157637		0.372683	1.43295
8.33333	0.974368	1.06711	0.00218883	0.00106847		1.02042	2.8388
8.66667	0.983318	1.07223	0.00160921	0.000918034		1.21337	0.161117
9	0.997771	1.07988	0.00156975	0.00120177		0.447143	0.451774
9.33333	0.998393	1.07979	0.00166182	0.0016161		0.82774	0.206816
9.66667	0.997318	1.08286	0.00299703	0.00194489		0.160908	0.253501
10	0.999242	1.08982	0.0073753	0.00545274		0.053332	-0.014453
10.3333	0.99804	1.09665	0.00751015	0.00543056		0.947388	1.0606
10.6667	0.999208	1.0997	0.0078829	0.00687013		0.643276	0.409823
11	1.00177	1.10328	0.00856355	0.00775946		1.65096	0.270961
11.3333	1.00957	1.10759	0.00879358	0.00877543		0.767395	-0.242159
11.6667	1.00646	1.11154	0.00903268	0.00937244		1.73388	-0.017549
12	1.01054	1.11512	0.00988637	0.00978099		1.42176	-0.080435
12.3333	1.01061	1.115	0.00990153	0.0100037		2.37416	-0.30034
12.6667	1.01744	1.11882	0.0101088	0.0101321		3.76792	1.2418
13	1.01712	1.12256	0.00963536	0.0103166		2.30555	-0.048278
13.3333	1.01716	1.12492	0.0107696	0.0102005		1.13755	0.791991
13.6667	1.01682	1.13008	0.0103283	0.0108093		0.922537	1.08483
14	1.01586	1.13067	0.0105946	0.0108531		2.51323	0.10212
14.3333	1.01393	1.13542	0.0104302	0.010999		0.538617	0.246664
14.6667	1.02232	1.14159	0.0109683	0.011574		3.04182	0.260548
15	1.02145	1.14834	0.0112256	0.0119428		3.6597	0.243712
15.3333	1.0264	1.15013	0.0117323	0.0122929		2.79833	0.400099
15.6667	1.03143	1.15421	0.0120893	0.0127795		2.89536	0.547358
16	1.03167	1.15299	0.0122072	0.0132908		0.806851	0.27801
16.3333	1.03501	1.1589	0.0125195	0.0136288		0.996959	0.327372
16.6667	1.03975	1.15901	0.012613	0.0141827		0.889717	0.454273
17	1.03987	1.16664	0.012647	0.0150217		2.87665	0.827698
17.3333	1.04768	1.16882	0.013276	0.0151961		0.173405	0.151257
17.6667	1.05346	1.16825	0.0134436	0.0158327		0.73893	0.13348
18	1.05191	1.16715	0.0139956	0.0170227		0.09299	0.491319
18.3333	1.05554	1.17018	0.014442	0.0166341		0.981053	0.425687
18.6667	1.05823	1.16923	0.0147542	0.0171748		2.21604	0.432102
19	1.06515	1.16644	0.0153976	0.0177035		0.918612	0.485984
19.3333	1.06912	1.16408	0.0157203	0.018324		0.626401	0.09994
19.6667	1.07268	1.16506	0.0166281	0.0200549		-0.042537	0.276039
20	1.07601	1.1668	0.0165821	0.0198059		0.343077	0.982772
20.3333	1.08069	1.17004	0.0174453	0.0199808		0.257287	0.416746
20.6667	1.07925	1.17033	0.0184316	0.020228		0.764232	0.217287
21	1.0876	1.16829	0.0188104	0.0204858		0.731972	0.384924
21.3333	1.08808	1.17185	0.0198534	0.0204751		0.521128	0.393101
21.6667	1.09248	1.17189	0.0207085	0.0210676		3.66946	-0.080975
22	1.09469	1.17473	0.0213173	0.0213055		1.44954	-0.093117
22.3333	1.1004	1.1704	0.0221492	0.0217857		2.00273	0.984596
22.6667	1.1028	1.1759	0.0228907	0.0221764		0.556315	0.602982
23	1.11143	1.1782	0.0229656	0.022004		0.9416
23.3333	1.10603	1.18526	0.0242407	0.0224365		0.547056
23.6667	1.11011	1.18949	0.0243136	0.0231734		0.856271
24	1.10944	1.19345	0.0246039	0.0230688
24.3333	1.1114	1.19468	0.0253894	0.0231868
24.6667	1.11499	1.19702	0.0258662	0.0233844
25	1.11825	1.19947	0.0267304	0.0236862
25.3333	1.12524	1.20044	0.0269172	0.0237407
25.6667	1.12863	1.20043	0.0268362	0.024248
26	1.13024	1.2021	0.0267583	0.0239466
26.3333	1.13481	1.20835	0.0268489	0.0238122
26.6667	1.13613	1.20503	0.0268704	0.0238068
27	1.13738	1.20724	0.0274122	0.0241224
27.3333	1.1388	1.21407	0.0273571	0.0238102
27.6667	1.14851	1.21889	0.0277487	0.0240265
28	1.15012	1.22861	0.0276889	0.0241449
28.3333	1.15181	1.21694	0.0273836	0.0239654
28.6667	1.16109	1.2163	0.027493	0.0240621
29	1.15823	1.21634	0.0266425	0.0240628
29.3333	1.16705	1.21946	0.0268233	0.0241346
29.6667	1.17066	1.22505	0.027204	0.0242904
30	1.16781	1.22455	0.0267554	0.0244908
30.3333	1.17473	1.22554	0.0272296	0.0245156
30.6667	1.17734	1.2269	0.0280867	0.0243661
31	1.18131	1.2283	0.0270972	0.023924
31.3333	1.18473	1.23147	0.0275553	0.0253624
31.6667	1.19362	1.23438	0.0273213	0.024553
32	1.19378	1.23888	0.0277274	0.0247023
32.3333	1.19922	1.23834	0.027455	0.0243174
32.6667	1.20289	1.24211	0.0271718	0.0243392
33	1.20342	1.24178	0.0275508	0.0258025
33.3333	1.20516	1.24465	0.0275188	0.0246569
33.6667	1.20414	1.2509	0.0285348	0.0248869
34	1.21332	1.25609	0.0284259	0.0253256
34.3333	1.22171	1.25842	0.0285276	0.0254424
34.6667	1.22067	1.26377	0.0291789	0.0257427
35	1.22484	1.26506	0.0281389	0.0256042
35.3333	1.22271	1.26969	0.0280807	0.025617
35.6667	1.22903	1.26988	0.0281729	0.0258753
36	1.23599	1.27212	0.0282897	0.026307
36.3333	1.23744	1.27491	0.0281798	0.0264387
36.6667	1.23651	1.27704	0.0284406	0.0267496
37	1.24217	1.27988	0.0284456	0.0271252
37.3333	1.24717	1.28167	0.0293636	0.0273804
37.6667	1.24861	1.28212	0.0288262	0.0276728
38	1.25099	1.28688	0.0284744	0.027695
38.3333	1.25395	1.28984	0.029039	0.0282444
38.6667	1.25884	1.29443	0.0287961	0.0284655
39	1.26694	1.29191	0.0290659	0.0288546
39.3333	1.27773	1.29609	0.02961	0.0288009
39.6667	1.27417	1.30821	0.0297447	0.0293327
40	1.28031	1.32314	0.0298352	0.0293518
40.3333	1.28458	1.3044	0.0301003	0.0296221
40.6667	1.28765	1.31457	0.0301809	0.0301144
41	1.28908	1.31621	0.0306007	0.0303872
41.3333	1.29226	1.3235	0.0305396	0.0300912
41.6667	1.29472	1.32639	0.0307163	0.0306388
42	1.29947	1.33302	0.0303732	0.0309739
42.3333	1.30488	1.33209	0.0302531	0.0310236
42.6667	1.3106	1.329	0.0301577	0.0313834
43	1.30717	1.33171	0.0309733	0.0319677
43.3333	1.31698	1.33727	0.0310582	0.0320734
43.6667	1.32595	1.33285	0.0309777	0.032704
44	1.32462	1.33604	0.0316625	0.0325519
44.3333	1.3288	1.33532	0.0316928	0.0329438
44.6667	1.33461	1.33845	0.0317043	0.0356529
45	1.33724	1.34249	0.0318087	0.0392526
45.3333	1.34601	1.34781	0.0320482	0.0336168
45.6667	1.35106	1.35067	0.0324714	0.0334804
46	1.3516	1.34956	0.0323717	0.0339174
46.3333	1.35239	1.35177	0.0324864	0.0337013
46.6667	1.35122	1.3507	0.0322896	0.0343915
47	1.3598	1.35414	0.0323931	0.0349368
47.3333	1.3582	1.35693	0.0331758	0.0345842
47.6667	1.36656	1.35748	0.0328433	0.0355283
48	1.3647	1.3565	0.0331916	0.0358885
48.3333	1.36359	1.35431	0.0334455	0.0362351
48.6667	1.36196	1.35445	0.0343266	0.0363552
49	1.3669	1.35584	0.0335439	0.0369006
49.3333	1.36526	1.3588	0.0336251	0.0373015
49.6667	1.36981	1.35871	0.0342489	0.0375714
50	1.37896	1.36586	0.0344313	0.0379807
50.3333	1.37657	1.36311	0.0348557	0.0379192
50.6667	1.37905	1.3651	0.0349519	0.0380477
51	1.3808	1.36629	0.0347019	0.0384107
51.3333	1.38796	1.37031	0.0352811	0.0385362
51.6667	1.39399	1.37583	0.035619	0.038684
52	1.39349	1.36325	0.0355788	0.0390125
52.3333	1.39489	1.37177	0.0354176	0.0390258
52.6667	1.39732	1.36757	0.0357422	0.0394139
53	1.40113	1.36178	0.0359394	0.0393016
53.3333	1.40245	1.362	0.0353303	0.0398106
53.6667	1.39977	1.36383	0.0352313	0.0401359
54	1.40718	1.36781	0.0360361	0.0402611
54.3333	1.40662	1.36821	0.036322	0.0403024
54.6667	1.40321	1.37198	0.0359778	0.0402438
55	1.40879	1.37611	0.0365134	0.0402153
55.3333	1.41509	1.37265	0.0369395	0.0399403
55.6667	1.41792	1.37156	0.0373216	0.0403747
56	1.4209	1.36936	0.037568	0.0404593
56.3333	1.41902	1.37772	0.0377998	0.0415668
56.6667	1.41946	1.37484	0.038176	0.0405326
57	1.42327	1.37756	0.0378164	0.0402711
57.3333	1.4245	1.37502	0.037725	0.0406432
57.6667	1.4276	1.37809	0.0376742	0.0410333
58	1.4336	1.38141	0.0385096	0.0413841
58.3333	1.43217	1.38025	0.0382771	0.0416084
58.6667	1.43836	1.38081	0.0379899	0.041917
59	1.43931	1.37914	0.038738	0.041825
59.3333	1.44819	1.37806	0.0385824	0.0418436
59.6667	1.44345	1.38441	0.0386814	0.0425438
60	1.44072	1.38777	0.0393377	0.0422763
60.3333	1.44855	1.38779	0.0398015	0.0431499
60.6667	1.44914	1.38925	0.0399163	0.0430453
61	1.45489	1.38812	0.0402041	0.0431249
61.3333	1.46047	1.39074	0.0403607	0.0430997
61.6667	1.45863	1.39221	0.0402686	0.0434185
62	1.45293	1.39395	0.040551	0.0433135
62.3333	1.45133	1.39745	0.0413015	0.0434923
62.6667	1.45335	1.39381	0.0411197	0.0434707
63	1.45264	1.39533	0.0416972	0.0434003
63.3333	1.46033	1.39392	0.0423361	0.0431617
63.6667	1.46401	1.39633	0.0427517	0.0431577
64	1.46988	1.39655	0.042872	0.0431472
64.3333	1.47531	1.3975	0.0436956	0.043316
64.6667	1.48082	1.39896	0.0425345	0.0433992
65	1.47611	1.39701	0.0430881	0.0433776
65.3333	1.47527	1.39795	0.0432018	0.0432561
65.6667	1.47879	1.39296	0.04378	0.0434807
66	1.48022	1.39199	0.0445877	0.043263
66.3333	1.48146	1.3946	0.044233	0.0434129
66.6667	1.4864	1.38998	0.0435958	0.0432988
67	1.48638	1.39341	0.0436331	0.0434662
67.3333	1.48126	1.39493	0.0435126	0.0434221
67.6667	1.48107	1.39178	0.0434373	0.0434407
68	1.48591	1.39342	0.0437796	0.0436379
68.3333	1.4832	1.38512	0.0442082	0.0437129
68.6667	1.47846	1.39137	0.0445691	0.0439502
69	1.48705	1.38871	0.0447739	0.0439261
69.3333	1.48599	1.39048	0.0453178	0.0440489
69.6667	1.48886	1.38614	0.0454464	0.0439396
70	1.48429	1.38315	0.0459783	0.0437494
70.3333	1.4819	1.37764	0.0457564	0.0446801
70.6667	1.48771	1.38294	0.0459987	0.0441632
71	1.48418	1.37846	0.0461485	0.0439366
71.3333	1.48721	1.38972	0.0468017	0.0441027
71.6667	1.4871	1.38088	0.0466054	0.0442597
72	1.48401	1.38559	0.0466447	0.0443894
72.3333	1.48392	1.38144	0.046309	0.0447475
72.6667	1.48754	1.38343	0.0466871	0.0441769
73	1.48644	1.38433	0.0463694	0.0439177
73.3333	1.48732	1.38158	0.0475764	0.0438256
73.6667	1.49416	1.38642	0.0468907	0.0447759
74	1.49785	1.38093	0.0473513	0.0439621
74.3333	1.49655	1.38184	0.0470905	0.044356
74.6667	1.4969	1.38261	0.0478045	0.0449168
75	1.49886	1.38377	0.0476575	0.0451901
75.3333	1.49614	1.38743	0.0473749	0.0449465
75.6667	1.49381	1.38485	0.0476042	0.0450316
76	1.49398	1.38999	0.0480178	0.0449365
76.3333	1.49694	1.3868	0.0474978	0.0447221
76.6667	1.49141	1.37836	0.0479605	0.0456728
77	1.48767	1.3777	0.0480299	0.0459245
77.3333	1.4851	1.37221	0.0477618	0.0461959
77.6667	1.48948	1.37286	0.0477417	0.0456628
78	1.48939	1.37037	0.047906	0.0459275
78.3333	1.48969	1.37025	0.0479102	0.0456734
78.6667	1.49248	1.37853	0.0476985	0.0460942
79	1.49128	1.37738	0.0481129	0.0459904
79.3333	1.49093	1.38263	0.0484798	0.045486
79.6667	1.49473	1.38391	0.0481707	0.0457958
80	1.49465	1.38111	0.0481903	0.0458425
80.3333	1.49223	1.37911	0.0482675	0.0462559
80.6667	1.49112	1.38239	0.0479592	0.0459939
81	1.49596	1.37872	0.0481686	0.0461354
81.3333	1.49732	1.38109	0.0478764	0.0459205
81.6667	1.499	1.38407	0.048063	0.0455801
82	1.49451	1.38207	0.0480875	0.0459918
82.3333	1.49242	1.38186	0.0474023	0.0452787
82.6667	1.49886	1.37732	0.047839	0.0454578
83	1.50033	1.37623	0.047279	0.0456149
83.3333	1.49907	1.376	0.0480393	0.0455354
83.6667	1.49715	1.37619	0.0478571	0.0459084
84	1.49677	1.37816	0.0483842	0.0458255
84.3333	1.49318	1.37855	0.0484176	0.0458622
84.6667	1.49708	1.37344	0.0483756	0.0464108
85	1.49583	1.37544	0.0485122	0.0459441
85.3333	1.50106	1.37512	0.0483165	0.0457457
85.6667	1.50276	1.37286	0.0486267	0.0457137
86	1.50229	1.37117	0.0489051	0.0461034
86.3333	1.50045	1.37046	0.049391	0.0459112
86.6667	1.50354	1.36992	0.048268	0.0463656
87	1.50092	1.3698	0.0486986	0.0462711
87.3333	1.50051	1.36997	0.0485812	0.0464811
87.6667	1.50211	1.36836	0.0487833	0.0466311
88	1.50408	1.36872	0.0488898	0.046534
88.3333	1.49909	1.3713	0.0491105	0.0461852
88.6667	1.50033	1.37269	0.048776	0.0466334
89	1.50149	1.36963	0.048449	0.0466971
89.3333	1.50661	1.3707	0.0486474	0.047787
89.6667	1.50704	1.37412	0.0485806	0.0464227
90	1.50971	1.37665	0.0491536	0.0466016
90.3333	1.51026	1.37824	0.0497753	0.0473414
90.6667	1.50591	1.37293	0.0503279	0.0468743
91	1.50938	1.36961	0.0498091	0.0469909
91.3333	1.51064	1.37419	0.0497164	0.046826
91.6667	1.51313	1.37366	0.0496475	0.0468588
92	1.5127	1.37494	0.0497602	0.0467188
92.3333	1.5092	1.3776	0.0499091	0.0467329
92.6667	1.51846	1.37714	0.0500746	0.0467479
93	1.51588	1.37992	0.0500614	0.0470006
93.3333	1.52274	1.37505	0.0500446	0.0468236
93.6667	1.52852	1.37583	0.0502736	0.0472614
94	1.52738	1.37405	0.0504493	0.0472892
94.3333	1.52333	1.37207	0.0511459	0.0473258
94.6667	1.52565	1.37177	0.0513295	0.0474385
95	1.53337	1.3733	0.051184	0.047631
95.3333	1.53813	1.3695	0.0505048	0.0478747
95.6667	1.53165	1.37082	0.0506259	0.0479107
96	1.52991	1.36818	0.0507163	0.0476399
96.3333	1.53551	1.36925	0.052096	0.0482082
96.6667	1.53369	1.37035	0.0518587	0.0478971
97	1.53761	1.36928	0.051005	0.0478403
97.3333	1.53929	1.36662	0.051123	0.0489623
97.6667	1.54485	1.36955	0.0518351	0.0483259
98	1.54099	1.36905	0.0522599	0.0482004
98.3333	1.54845	1.36659	0.0529346	0.0480389
98.6667	1.55119	1.36344	0.0531718	0.0482331
99	1.54459	1.36598	0.0534552	0.0477521
99.3333	1.55259	1.36365	0.0529514	0.0475001
99.6667	1.55249	1.37193	0.0529319	0.0478849
100	1.55432	1.35928	0.0536538	0.04748
100.333	1.55826	1.359	0.0550217	0.0471771
100.667	1.55523	1.36119	0.0539195	0.04803
101	1.55546	1.3589	0.054254	0.0477036
101.333	1.56083	1.35413	0.0552427	0.0479627
101.667	1.56065	1.35271	0.0547389	0.0481462
102	1.56347	1.35331	0.0549662	0.048097
102.333	1.55831	1.355	0.0548402	0.0476031
102.667	1.56103	1.35179	0.0556678	0.047478
103	1.56026	1.35357	0.0553617	0.0477035
103.333	1.56669	1.35558	0.0552959	0.0481661
103.667	1.57093	1.34781	0.0554021	0.0480914
104	1.57221	1.35774	0.0552767	0.0484817
104.333	1.57352	1.35456	0.0559398	0.0485013
104.667	1.56666	1.35487	0.0557007	0.0507627
105	1.58018	1.34975	0.0561217	0.0481614
105.333	1.5793	1.34439	0.0570819	0.0482307
105.667	1.57829	1.34944	0.056687	0.0481132
106	1.58996	1.34711	0.0563893	0.0484798
106.333	1.59092	1.3475	0.0570481	0.0478081
106.667	1.58588	1.34196	0.0572772	0.0479437
107	1.58513	1.34294	0.0570654	0.0483535
107.333	1.58897	1.34347	0.0571067	0.0484519
107.667	1.59022	1.34187	0.0564411	0.0484011
108	1.58938	1.34053	0.0569239	0.0487159
108.333	1.59312	1.34411	0.0563546	0.0485609
108.667	1.59105	1.33954	0.0572105	0.0478363
109	1.58972	1.33978	0.0579379	0.0489936
109.333	1.58872	1.33865	0.0571892	0.0487774
109.667	1.59613	1.33645	0.0569592	0.0487578
110	1.60402	1.34881	0.0580345	0.0489854
110.333	1.60771	1.34549	0.0588345	0.0487676
110.667	1.61407	1.34829	0.0587263	0.0491279
111	1.60951	1.34432	0.0589054	0.048912
111.333	1.60757	1.34889	0.0591422	0.0487504
111.667	1.61433	1.34229	0.0591347	0.0486609
112	1.61596	1.35446	0.0593585	0.048676
112.333	1.61191	1.3497	0.0591267	0.0489226
112.667	1.60852	1.34904	0.0594087	0.0491414
113	1.60955	1.34425	0.0590577	0.0489058
113.333	1.60447	1.33953	0.0597215	0.0492599
113.667	1.60372	1.33343	0.0587021	0.0491143
114	1.60839	1.33291	0.058501	0.0492357
114.333	1.60593	1.33045	0.0588899	0.0489992
114.667	1.60368	1.32681	0.0595515	0.049051
115	1.60049	1.32867	0.0604292	0.050408
115.333	1.60448	1.33591	0.0606285	0.0490933
115.667	1.60818	1.33472	0.0600083	0.0503252
116	1.61001	1.33911	0.0601669	0.0500837
116.333	1.6078	1.33673	0.0595999	0.0501077
116.667	1.6093	1.33774	0.0599819	0.0507321
117	1.6083	1.33905	0.0600884	0.0508009
117.333	1.61384	1.34242	0.0597154	0.0502327
117.667	1.6145	1.34029	0.0595517	0.0502424
118	1.61709	1.33645	0.0595707	0.0505102
118.333	1.62132	1.3379	0.0589373	0.0506638
118.667	1.61468	1.34061	0.0590151	0.0499127
119	1.61637	1.34162	0.0593014	0.0498561
119.333	1.61844	1.3426	0.0591706	0.0496276
119.667	1.61551	1.34808	0.0584214	0.0489719
120	1.6212	1.34411	0.0586708	0.0492399
120.333	1.62452	1.33879	0.0583875	0.0503075
120.667	1.63283	1.33831	0.0591125	0.0500808
121	1.63142	1.34173	0.0588781	0.0503604
121.333	1.63639	1.34469	0.0583607	0.0500156
121.667	1.63645	1.34643	0.0580028	0.0508535
122	1.63882	1.3465	0.0581554	0.0508966
122.333	1.64201	1.34387	0.058249	0.0503711
122.667	1.64719	1.34521	0.0585119	0.0509798
123	1.64558	1.3415	0.0591573	0.0506345
123.333	1.64756	1.33951	0.0587538	0.050915
123.667	1.65008	1.34394	0.0587506	0.0512045
124	1.6486	1.34176	0.0584494	0.0508549
124.333	1.65831	1.34433	0.0581794	0.0513331
124.667	1.65682	1.3458	0.0587327	0.0515357
125	1.65663	1.33675	0.0594176	0.0517154
125.333	1.65688	1.33999	0.059635	0.0515354
125.667	1.65384	1.33885	0.0596489	0.0515815
126	1.65905	1.33975	0.059726	0.0524508
126.333	1.66791	1.3386	0.0593933	0.0527582
126.667	1.66546	1.34041	0.0597193	0.0525405
127	1.66406	1.33976	0.0599312	0.0526148
127.333	1.66819	1.34029	0.0607673	0.0527127
127.667	1.6715	1.34273	0.0611572	0.0527043
128	1.67093	1.34331	0.0610204	0.0525618
128.333	1.6786	1.34282	0.062454	0.0514281
128.667	1.68197	1.33293	0.0617856	0.0520638
129	1.68231	1.33764	0.0616131	0.0526915
129.333	1.69026	1.33919	0.0622534	0.053307
129.667	1.69051	1.33833	0.0624263	0.0526588
130	1.68844	1.3423	0.0624352	0.052563
130.333	1.6938	1.34859	0.0627585	0.0529046
130.667	1.69739	1.34823	0.0629918	0.052348
131	1.70005	1.34967	0.0631676	0.0524626
131.333	1.70326	1.34767	0.0635582	0.0525378
131.667	1.70071	1.3502	0.0632026	0.0526607
132	1.7041	1.35096	0.0633022	0.0520674
132.333	1.70503	1.34623	0.0636719	0.0520445
132.667	1.70598	1.3478	0.0643441	0.0523875
133	1.7104	1.34643	0.0640489	0.0529325
133.333	1.70381	1.34818	0.0644573	0.0530671
133.667	1.71614	1.34949	0.0649093	0.0532769
134	1.71892	1.35078	0.0648131	0.0529927
134.333	1.72028	1.34726	0.0655919	0.0535917
134.667	1.72906	1.34799	0.0653266	0.0524775
135	1.73184	1.3512	0.0658788	0.0529753
135.333	1.7331	1.35091	0.0660175	0.0530477
135.667	1.73796	1.35254	0.0662866	0.0533758
136	1.7386	1.35378	0.0664969	0.0535903
136.333	1.73653	1.35217	0.0668611	0.053687
136.667	1.74026	1.3466	0.0676282	0.0537056
137	1.7434	1.35117	0.0674293	0.0543287
137.333	1.74263	1.35191	0.0676086	0.0542704
137.667	1.7458	1.35208	0.0681612	0.0539537
138	1.75769	1.35308	0.0678869	0.0537864
138.333	1.75843	1.34965	0.0663036	0.0539322
138.667	1.76764	1.3438	0.0694393	0.0544868
139	1.77099	1.3496	0.0689654	0.0543209
139.333	1.77757	1.35357	0.0694682	0.0541093
139.667	1.77276	1.34992	0.070159	0.0542312
140	1.76716	1.35141	0.069788	0.0544513
140.333	1.77496	1.35285	0.0704074	0.0542488
140.667	1.78019	1.34796	0.0712447	0.0547381
141	1.77637	1.34663	0.0709378	0.0549998
141.333	1.77984	1.35193	0.0717229	0.0544605
141.667	1.78566	1.34808	0.0722276	0.0539627
142	1.78891	1.347	0.0728736	0.0542624
142.333	1.78608	1.34581	0.0727628	0.0544141
142.667	1.78111	1.34245	0.0728648	0.0549369
143	1.78437	1.3414	0.0734045	0.0545873
143.333	1.78355	1.3432	0.0735516	0.0542576
143.667	1.78698	1.34668	0.074537	0.0530413
144	1.78845	1.34722	0.0754017	0.0541076
144.333	1.78267	1.34683	0.0759014	0.054273
144.667	1.78919	1.34679	0.0751029	0.053953
145	1.7893	1.35156	0.074435	0.0546234
145.333	1.79145	1.34672	0.0749524	0.0542957
145.667	1.79412	1.34344	0.0749719	0.0540706
146	1.79142	1.34115	0.0753536	0.0541247
146.333	1.79627	1.33613	0.0757958	0.0544419
146.667	1.80417	1.33301	0.0763808	0.0546924
147	1.80768	1.33515	0.0765591	0.0540768
147.333	1.80641	1.34176	0.0772617	0.054257
147.667	1.79829	1.33753	0.0770159	0.0523311
148	1.80707	1.33753	0.0766822	0.0520889
148.333	1.80143	1.34927	0.0774918	0.0532949
148.667	1.81016	1.33723	0.077905	0.0541655
149	1.81162	1.33763	0.0781954	0.0542173
149.333	1.81023	1.33881	0.0773792	0.0554199
149.667	1.81405	1.33531	0.0781683	0.0540929
150	1.81545	1.33651	0.0785443	0.0543337
150.333	1.81889	1.34007	0.0789123	0.0538579
150.667	1.81731	1.33871	0.0795129	0.0536287
151	1.82066	1.34493	0.0788296	0.0535601
151.333	1.8241	1.34353	0.0791751	0.0530455
151.667	1.82585	1.34219	0.0802525	0.0529546
152	1.82555	1.35139	0.0814285	0.0531979
152.333	1.82777	1.34148	0.0804371	0.0536328
152.667	1.8271	1.33605	0.0804464	0.0532066
153	1.8316	1.33539	0.0810925	0.0532087
153.333	1.83759	1.34268	0.0807567	0.0586533
153.667	1.84103	1.34007	0.0812841	0.0526398
154	1.8496	1.32896	0.0813217	0.052298
154.333	1.84466	1.32941	0.0819917	0.0530763
154.667	1.84691	1.33161	0.081971	0.0524664
155	1.84739	1.33868	0.0823381	0.0529441
155.333	1.84984	1.33684	0.0828353	0.0531621
155.667	1.85218	1.33762	0.0827113	0.0531339
156	1.85117	1.33499	0.0833821	0.0545872
156.333	1.85535	1.3359	0.0832118	0.0539993
156.667	1.85699	1.33496	0.0838612	0.0531633
157	1.85869	1.33668	0.0846646	0.0571296
157.333	1.86148	1.33669	0.0846046	0.0536587
157.667	1.86477	1.34016	0.0844297	0.0524264
158	1.86133	1.34635	0.0851589	0.0522753
158.333	1.86508	1.34257	0.0850648	0.0529358
158.667	1.87218	1.35009	0.0856718	0.0544925
159	1.87059	1.34927	0.0857232	0.0509881
159.333	1.87239	1.3475	0.0859005	0.0514084
159.667	1.87877	1.34595	0.0857832	0.0515669
160	1.88047	1.34484	0.0861922	0.0518024
160.333	1.88307	1.3422	0.0865282	0.0522206
160.667	1.88812	1.34238	0.086175	0.0523787
161	1.88856	1.3384	0.0855682	0.0522345
161.333	1.8877	1.33345	0.0862992	0.0524025
161.667	1.88835	1.33511	0.0864442	0.0529617
162	1.89523	1.3332	0.0867017	0.0523625
162.333	1.89688	1.33074	0.0872977	0.0530423
162.667	1.90433	1.32942	0.0872366	0.0542579
163	1.90644	1.33247	0.087087	0.0542037
163.333	1.90992	1.3319	0.0876902	0.05305
163.667	1.90652	1.33273	0.0886034	0.0533908
164	1.90614	1.33479	0.0887542	0.0533646
164.333	1.90521	1.33803	0.0891765	0.0529456
164.667	1.9085	1.34189	0.0890733	0.0531655
165	1.90723	1.345	0.0893982	0.0535235
165.333	1.91466	1.34777	0.0903224	0.0532572
165.667	1.91884	1.34971	0.0895807	0.0533746
166	1.91852	1.34926	0.0901516	0.0531352
166.333	1.92129	1.34927	0.090598	0.0527089
166.667	1.92076	1.3454	0.0910007	0.0533739
167	1.92861	1.34015	0.0914331	0.0527125
167.333	1.93159	1.33473	0.0920254	0.0525114
167.667	1.93469	1.34111	0.0921827	0.0525166
168	1.93793	1.33904	0.0925476	0.0529286
168.333	1.94202	1.33797	0.0926469	0.0528462
168.667	1.94318	1.3365	0.0924918	0.0529789
169	1.94208	1.33208	0.0927341	0.0531426
169.333	1.94608	1.33263	0.0933293	0.0537296
169.667	1.94225	1.33517	0.0943015	0.0543349
170	1.9514	1.33724	0.0940921	0.0546484
170.333	1.95073	1.33298	0.0943233	0.0548739
170.667	1.95215	1.33476	0.0951714	0.0547234
171	1.95052	1.338	0.0945353	0.0547028
171.333	1.95694	1.33303	0.0950286	0.0537057
171.667	1.95723	1.3345	0.0944042	0.0548376
172	1.95745	1.33458	0.0956667	0.0542849
172.333	1.962	1.33576	0.0958329	0.05401
172.667	1.96772	1.33254	0.0956809	0.0546576
173	1.96675	1.34038	0.095991	0.0546715
173.333	1.96978	1.34299	0.0967938	0.0552353
173.667	1.97363	1.34131	0.0971669	0.0548237
174	1.96959	1.3485	0.0967837	0.0543315
174.333	1.97419	1.35753	0.098081	0.0550439
174.667	1.97405	1.35644	0.0975568	0.0545717
175	1.97705	1.35437	0.098533	0.0550064
175.333	1.97954	1.34886	0.0984985	0.054834
175.667	1.98355	1.35284	0.0987425	0.0549044
176	1.99087	1.35506	0.0994748	0.0549184
176.333	1.99173	1.34862	0.0987264	0.0546977
176.667	1.99597	1.34508	0.099691	0.0548355
177	1.9993	1.35085	0.100139	0.0554776
177.333	1.99297	1.35039	0.100521	0.0583362
177.667	1.9947	1.34739	0.101006	0.0556249
178	1.99506	1.34625	0.1011	0.0552955
178.333	1.99968	1.34512	0.101433	0.0556693
178.667	1.99462	1.34006	0.101366	0.0557651
179	2.00172	1.34083	0.101855	0.0562759
179.333	1.99814	1.34338	0.101653	0.0569834
179.667	2.00348	1.34601	0.102321	0.0570067
180	2.00263	1.34185	0.102518	0.0568306
180.333	2.00638	1.34438	0.102787	0.0568204
180.667	2.00555	1.35262	0.103087	0.0573513
181	2.01129	1.34299	0.103855	0.0576397
181.333	2.00813	1.33984	0.103795	0.0552953
181.667	2.00216	1.3418	0.104456	0.0537326
182	2.00522	1.33969	0.105023	0.0556224
182.333	2.00786	1.34015	0.104482	0.0572852
182.667	2.01091	1.34818	0.105152	0.0568481
183	2.01404	1.34456	0.105674	0.0562656
183.333	2.01345	1.34129	0.106153	0.0566069
183.667	2.01203	1.34401	0.105715	0.0561223
184	2.01256	1.34571	0.106453	0.0562861
184.333	2.01882	1.34728	0.106001	0.0559069
184.667	2.01837	1.35083	0.106682	0.0567833
185	2.02194	1.3559	0.106474	0.0564701
