# Supplementary material for: Movement of accessible plasma membrane cholesterol by the GRAMD1 lipid transfer protein complex
Source: eLife. 2019 Nov 14;8:e51401. doi: 10.7554/eLife.51401 (PMC6905856; doi:10.7554/eLife.51401)
Supplement: Figure 7—figure supplement 1—source data 1. [file elife-51401-fig7-figsupp1-data1.xlsx]

## Sheet: Source data Figure 7-S-1 B
Source data for Figure 7-figure supplement 1 B
Fluo. Intensity (A.U.) (PM EGFP-D4H)
Individual Values
TKO	TKO + MCD
4.7947	0.00398257
1.91327	0.00529005
2.2944	0.00429854
3.34021	0.00425594
2.69192	0.00579729
2.08362	0.00447035
1.94823	0.00468298
2.08362	0.0107529
1.76049	0.0229739
2.94441	0.00557127
2.73354	0.00774958
3.22403	0.00733806
4.00098	0.00482579
1.16446	0.0229072
2.39297	0.0051066
1.79751	0.00369898
1.52083	0.00512189
1.52083	0.00558122
3.84327	0.0105539
2.30233	0.00782279
