# Supplementary material for: Movement of accessible plasma membrane cholesterol by the GRAMD1 lipid transfer protein complex
Source: eLife. 2019 Nov 14;8:e51401. doi: 10.7554/eLife.51401 (PMC6905856; doi:10.7554/eLife.51401)
Supplement: Figure 7—figure supplement 2—source data 1. [file elife-51401-fig7-figsupp2-data1.xlsx]

## Sheet: Source data Figure 7-S-2 B,F,H
Source data for Figure 7-figure supplement 2 B						Source data for Figure 7-figure supplement 2 F					Source data for Figure 7-figure supplement 2 H
Fluo. Intensity (A.U.) (PM EGFP-D4H)						Fluo. Intensity (A.U.) (PM EGFP-D4H)					Fluo. Intensity (A.U.) (PM EGFP-D4H)
Individual Values						Individual Values					Individual Values
Control	TKO	TKO + GRAMD1a	TKO + GRAMD1b	TKO + GRAMD1c		Control	TKO	TKO + WT	TKO + 5P		TKO	TKO + WT	TKO + T469D	TKO + Y430A, V445A
0.524315	3.26052	0.967953	1.03902	2.25472		0.353186	5.80112	1.39342	1.24261		3.87361	0.606931	5.0162	2.0454
0.899282	2.4656	1.1012	0.977991	2.09484		0.250447	3.70171	1.28203	1.77095		2.79414	0.705641	2.68412	2.22804
2.39881	2.83616	0.665648	0.833653	0.427133		0.651812	4.19174	1.0723	1.10172		2.67701	0.960186	2.70788	2.24001
2.87122	3.42104	3.29833	0.987553	0.302066		0.206614	3.26191	2.23883	1.26545		4.48947	1.07126	2.29791	1.94504
0.693598	4.36825	2.26952	2.177	1.30722		0.480367	1.7487	2.07986	3.52294		2.04377	0.745477	3.68484	2.41497
1.23787	3.657	1.87631	1.94988	3.08782		0.267759	0.855874	2.04001	4.68071		1.35687	2.05657	2.99882	3.4691
3.81671	2.1282	1.91868	1.12828	5.14211		1.23362	1.94126	1.38167	4.50631		1.55704	1.26267	2.40819	3.61905
3.12171	3.56152	2.11968	1.18145	1.40943		1.47338	3.02757	1.31819	3.04406		2.49285	0.900287	2.31126	0.784099
1.33496	1.56615	1.70395	1.37752	0.862522		0.618964	2.53995	1.18844	3.9075		3.03784	1.03821	2.21014	3.61905
2.75318	2.53584	2.13278	1.37729	1.24364		1.84827	0.728139	1.27375	4.55048		1.05016	1.57652	2.79968	1.29034
3.37326	1.65377	1.51422	1.26775	1.30922		0.805134	3.58251	1.88362	2.44885		1.47305	0.581124	2.95605	1.30855
2.38824	5.05847	2.5818	1.34369	0.374228		1.85229	2.40288	0.777436	3.13639		3.63043	1.61419	1.58822	1.57231
0.518856	1.78848	0.602346	0.598263	1.03949		5.72448	5.85392	1.48781	3.21671		1.5835	1.14478	3.35587	0.731792
1.10557	4.77662	1.08333	0.804754	1.97688		0.928877	1.0413	1.27812	2.61368		0.852807	0.810006	3.17101	1.62396
2.20421	2.17226	1.41974	1.26825	0.94328		1.20088	7.00904	1.28696	4.08622		1.45731	2.23048	2.18308	1.3113
0.857025	2.53182	0.845389	1.29622	0.961827		3.63052	1.63977	1.97969	3.20052		0.507949	0.955167	2.36875	1.6349
1.80933	2.11568	0.765733	1.8165	2.82858		1.26206	3.42237	1.71812	2.4978		2.37782	1.57364	1.84619	1.32676
2.04635	2.49494	0.70364	2.73513	1.6069		1.18491	2.63383	2.13172	0.797922		1.81467	0.829017	2.24497	1.60706
1.02598	2.53593	0.878432	1.8036	0.850067		1.04743	6.96868	2.8913	3.17342		4.22689	0.856796	1.43282	2.80906
2.0302	6.25995	1.29322	1.74306	1.15229		0.867439	2.45994	1.09186	5.20211		2.25997	0.74908	1.95386	3.08567
1.70767	3.40746	3.01958	0.46878	0.701052			3.95453	1.07416	2.19404		4.41538	0.872974	2.42079	1.47935
2.54492	2.56017	0.958452	0.904284	0.793957			6.99153	2.04421	1.00024		1.88662	1.05497	2.62873	1.57351
2.0359	1.42109	2.86283	0.909417	2.19277			5.56115	0.724315	3.71009		1.99578	0.746904	1.54959	2.36906
2.41725	2.29911	1.4594	1.29831	1.55123			2.77123	2.32192	1.47135		1.54289	1.23653	1.22741	2.4386
1.47782	2.7209	1.78781	1.55059	1.43108			3.23027	1.10808	2.39446		0.940097	1.69074	2.06928	1.35204
1.44049	1.8081	1.54092	1.19674	0.563555			2.3858	0.922698	1.75599		1.88991	1.01654	3.30961	3.53109
1.30992	2.53103	1.16568	2.34614	0.950759			1.65493	1.19578	0.846044		3.43482	1.66388	2.90043	2.34202
2.15841	2.01922	1.55691	1.82714	2.29747			3.65262	2.22224	1.83416		3.62091	1.33353	1.63184	1.788
0.873615	2.47359	2.25663	0.758001	0.808045			2.69605	1.66539	2.56186		2.22123	0.875662	1.29479	1.80482
2.36373	3.40385	1.23165	1.03156	0.526491			3.50929	1.18352	1.8189		2.50262	1.13235	1.75738	2.48288
1.37652	4.14524	0.64479	1.4839	1.43173			2.07159	2.37983	3.45524		2.6542	0.954863	1.32863	2.62775
1.68395	2.09432	0.631022	1.88074	2.2131			3.36844	1.47552	4.3728		3.85708	1.10122	1.06283	2.48599
1.97457	1.5929	0.300865	0.956546	2.63058			5.23038	1.54673	4.03452		2.223	2.98181	2.63786	1.38288
1.39922	3.5949	1.11851	0.67978	1.76798			4.52438	2.61015	2.39069		0.903233	0.988896	2.88589	1.85633
1.22067	2.07638	0.668869	1.61344	1.48429			2.12311	2.24102	1.62613		2.37675	0.429309	1.76722	2.97217
1.33871	2.5818	2.34243	0.705857	1.86462			2.38214	1.09825	2.66711		1.75116	0.60009	2.78331	2.43628
0.45705	2.00599	1.79132	1.40422	2.14749			3.44838	1.12151	2.39164		2.36483	0.730207	2.47115	2.19765
1.17146	2.42271	1.43282	1.68997	0.870729			2.79473	0.852327	2.39164		1.51732	0.984436	3.03267	1.24808
2.73774	2.95727	1.81421	0.697058	2.14483			2.94641	1.34908	5.48815		4.07951	0.703912	1.79649	1.99791
2.09272	4.11898	1.5407	1.34632	2.67603			3.13887	0.940706	4.51578		4.05589	0.722148	2.22716	2.46821
