# Supplementary material for: Movement of accessible plasma membrane cholesterol by the GRAMD1 lipid transfer protein complex
Source: eLife. 2019 Nov 14;8:e51401. doi: 10.7554/eLife.51401 (PMC6905856; doi:10.7554/eLife.51401)
Supplement: Figure 7—source data 1. [file elife-51401-fig7-data1.xlsx]

## Sheet: Source data Figure 7 D
Source data for Figure 7 D
F/F0 (miRFP-FKBP-GRAMD1b) (Left)								Dot Plot (Right)
	Average			SEM				Individual Values
Time (min)	WT	5P	T469D	WT	5P	T469D		WT	5P	T469D
0	1.0927	1.07406	1.07317	0.00745096	0.0088252	0.0091118		8.32455	6.02881	3.55329
0.333333	1.08133	1.06283	1.06023	0.00697677	0.00764328	0.00846742		2.09046	4.35268	2.38724
0.666667	1.06441	1.05203	1.05584	0.00601422	0.00949069	0.00823763		2.66478	4.09528	3.96744
1	1.05922	1.04636	1.05022	0.00586317	0.00727021	0.00697697		2.85546	5.61491	5.24572
1.33333	1.05099	1.04139	1.04305	0.004947	0.00649314	0.00520998		1.98501	4.2308	4.34891
1.66667	1.04475	1.0367	1.0342	0.00448233	0.00589023	0.00580292		3.62802	4.4016	3.28632
2	1.03836	1.03491	1.02933	0.00356984	0.00466465	0.00441662		1.34422	4.48635	4.63183
2.33333	1.02752	1.02576	1.02624	0.00319809	0.00369406	0.00393522		3.95173	5.86073	4.99176
2.66667	1.02331	1.01847	1.02019	0.00246879	0.00314503	0.00237515		2.11432	3.50651	2.00127
3	1.01182	1.01021	1.00981	0.00221718	0.00193129	0.00227645		3.43954	2.67049	2.3765
3.33333	1.00471	1.00246	1.00808	0.00131011	0.00144969	0.0014768		4.53645	2.69702	3.28103
3.66667	0.996189	1.00057	1.00639	0.00160234	0.00172535	0.0016755		9.0144	5.609	3.24894
4	0.993045	0.993238	0.989242	0.00177524	0.00189103	0.00194166		4.05765	4.26703	2.44442
4.33333	0.988258	0.986367	0.984958	0.00152869	0.00231158	0.00226553		5.71922	4.35755	2.16596
4.66667	0.982668	0.988688	0.981328	0.00273616	0.00316312	0.00232049		4.78128	3.42847	1.4468
5	1.02337	1.02329	0.997194	0.00686225	0.00625657	0.00618786		1.87193	2.97545	1.74072
5.33333	1.11297	1.05445	1.03742	0.0203648	0.0147534	0.00957149		0.872696	3.83177	1.05542
5.66667	1.20469	1.08816	1.09233	0.034151	0.0241455	0.0171333		2.70567	6.02528	3.24869
6	1.28373	1.11678	1.14832	0.0494901	0.0331274	0.0232795		5.07803	4.69139	3.73679
6.33333	1.36295	1.14609	1.20772	0.0650792	0.0415273	0.0273582		5.24772	3.39409	5.29302
6.66667	1.43309	1.18238	1.25151	0.078479	0.0485885	0.0321083		1.03092	3.22382	3.5011
7	1.50672	1.20702	1.29634	0.0837744	0.0561215	0.0368225		1.48688	2.76483	2.8242
7.33333	1.59539	1.24415	1.33947	0.087734	0.0624749	0.0398162		3.95596	2.27598	2.59176
7.66667	1.67261	1.2776	1.38002	0.0959673	0.069554	0.0443617		4.72109	2.53005	3.47797
8	1.7484	1.31523	1.42025	0.104123	0.0741099	0.0478835		5.92926	5.98952	4.37148
8.33333	1.81075	1.36048	1.45241	0.110923	0.0791094	0.0507511		5.14114	4.55865	1.91071
8.66667	1.87224	1.41352	1.49128	0.118199	0.0825972	0.0542323		5.42273	6.63204	1.66793
9	1.93939	1.46741	1.52762	0.125447	0.0860383	0.0572228		2.7047	6.17326
9.33333	1.99608	1.52797	1.56495	0.13182	0.0889066	0.0588024		2.76464	7.72762
9.66667	2.05708	1.58464	1.60313	0.137696	0.0913876	0.0618351
10	2.11687	1.64997	1.63958	0.143614	0.0946539	0.0642574
10.3333	2.16329	1.7084	1.67362	0.148736	0.0978424	0.0667238
10.6667	2.22557	1.77073	1.70999	0.154851	0.101323	0.0702682
11	2.27778	1.82306	1.7502	0.159606	0.103909	0.0724339
11.3333	2.34188	1.88197	1.78579	0.16643	0.105855	0.0765946
11.6667	2.39195	1.93951	1.81686	0.171534	0.111516	0.0774916
12	2.43634	2.0035	1.85304	0.176158	0.114449	0.0798918
12.3333	2.47729	2.05387	1.88737	0.181408	0.11774	0.0813994
12.6667	2.52499	2.11311	1.92782	0.186302	0.120696	0.0836378
13	2.57156	2.1676	1.95507	0.190587	0.124504	0.086272
13.3333	2.61392	2.22986	1.98845	0.19555	0.127118	0.0872762
13.6667	2.66148	2.27835	2.01651	0.200894	0.131742	0.0909889
14	2.69439	2.32777	2.04953	0.203925	0.134582	0.0935351
14.3333	2.7341	2.38743	2.08299	0.207704	0.136979	0.09459
14.6667	2.77706	2.44197	2.11164	0.210878	0.139231	0.0962097
15	2.80133	2.49252	2.14613	0.213874	0.143417	0.0987761
15.3333	2.83154	2.54113	2.1719	0.215978	0.146001	0.100746
15.6667	2.87783	2.60113	2.20366	0.22118	0.150856	0.103312
16	2.92344	2.63193	2.23434	0.226424	0.152104	0.103979
16.3333	2.96229	2.67549	2.26956	0.229349	0.154768	0.105609
16.6667	2.9969	2.71715	2.29941	0.231718	0.157476	0.108211
17	3.0357	2.76633	2.32501	0.235215	0.159968	0.108376
17.3333	3.06957	2.8163	2.36111	0.238126	0.161972	0.10939
17.6667	3.09643	2.85346	2.3876	0.240115	0.165086	0.111044
18	3.12895	2.90026	2.40816	0.243018	0.167448	0.112767
18.3333	3.16834	2.94053	2.44155	0.246052	0.167475	0.114089
18.6667	3.20176	2.98573	2.46383	0.249115	0.169189	0.114785
19	3.23425	3.03261	2.49301	0.251811	0.172529	0.118729
19.3333	3.26855	3.07729	2.53224	0.254289	0.174564	0.117663
19.6667	3.29647	3.12398	2.54854	0.255964	0.177656	0.118573
20	3.32908	3.17493	2.57064	0.259092	0.178833	0.11997
20.3333	3.3627	3.22015	2.5987	0.26161	0.181874	0.121676
20.6667	3.39938	3.25019	2.62443	0.263065	0.183635	0.122382
21	3.4463	3.28421	2.64816	0.264466	0.186091	0.123322
21.3333	3.45461	3.3179	2.66605	0.268309	0.188307	0.124791
21.6667	3.47099	3.35121	2.6928	0.269629	0.190024	0.126153
22	3.49672	3.39725	2.71476	0.271061	0.192278	0.126925
22.3333	3.53021	3.44367	2.74157	0.273282	0.194625	0.129288
22.6667	3.55654	3.49555	2.76345	0.275944	0.196228	0.131191
23	3.57046	3.54363	2.78661	0.277393	0.199078	0.133242
23.3333	3.60428	3.56843	2.79835	0.281085	0.199236	0.133846
23.6667	3.63651	3.60731	2.82139	0.283908	0.2022	0.134231
24	3.67323	3.65514	2.84656	0.285572	0.203208	0.135766
24.3333	3.68672	3.69463	2.8602	0.287297	0.205473	0.136956
24.6667	3.69398	3.73068	2.88803	0.292983	0.206525	0.139382
25	3.6509	3.76322	2.91186	0.293007	0.208362	0.140263
25.3333	3.67302	3.79123	2.93915	0.293929	0.209516	0.142162
25.6667	3.71911	3.83018	2.94869	0.292063	0.209721	0.141934
26	3.73563	3.85855	2.97193	0.293156	0.211871	0.14249
26.3333	3.83391	3.89364	2.99186	0.299435	0.214363	0.144049
26.6667	3.85004	3.92179	3.00874	0.299638	0.215217	0.145053
27	3.87447	3.93672	3.01835	0.301802	0.214999	0.145676
27.3333	3.89574	3.96945	3.03137	0.303954	0.217259	0.147668
27.6667	3.92635	4.00267	3.06425	0.306723	0.220322	0.149906
28	3.95389	4.03765	3.07822	0.308265	0.220736	0.149542
28.3333	3.97687	4.0565	3.10328	0.311777	0.222061	0.150313
28.6667	3.98956	4.09977	3.12432	0.313729	0.22218	0.150472
29	4.0149	4.12268	3.12937	0.314603	0.223741	0.149553
29.3333	4.02356	4.14124	3.14793	0.315152	0.223499	0.154524
29.6667	4.0424	4.18025	3.16583	0.314995	0.225439	0.151744
30	4.06048	4.20953	3.17827	0.316139	0.227039	0.155744
30.3333	4.07099	4.24206	3.19786	0.316413	0.228658	0.154932
30.6667	4.08112	4.25909	3.21602	0.317727	0.229139	0.155872
31	4.09429	4.28933	3.22916	0.318026	0.230837	0.157149
31.3333	4.11037	4.30624	3.24433	0.319894	0.230835	0.158347
31.6667	4.13284	4.33122	3.26274	0.321612	0.230298	0.157845
32	4.15114	4.36434	3.27838	0.322545	0.233583	0.160161
32.3333	4.17019	4.37804	3.29812	0.322888	0.234723	0.162224
32.6667	4.17928	4.40813	3.31057	0.325118	0.234068	0.163069
33	4.19621	4.42787	3.32615	0.324932	0.233237	0.164865
33.3333	4.19155	4.44124	3.3401	0.324459	0.233099	0.166573
33.6667	4.20666	4.44855	3.35399	0.326749	0.232509	0.16617
34	4.21361	4.47827	3.3705	0.326339	0.234714	0.166655
34.3333	4.21948	4.48503	3.3779	0.327647	0.234702	0.167078
34.6667	4.23186	4.50166	3.40258	0.327654	0.234929	0.169041
35	4.24406	4.5251	3.414	0.327844	0.235819	0.170512
35.3333	4.25427	4.54621	3.42427	0.331023	0.237534	0.169976
35.6667	4.27061	4.57186	3.43273	0.330354	0.239028	0.169699
36	4.27752	4.58078	3.43658	0.329756	0.238181	0.170373
36.3333	4.28774	4.60806	3.45941	0.331919	0.238694	0.169889
36.6667	4.28889	4.6375	3.47045	0.332265	0.240952	0.171201
37	4.29036	4.62691	3.47539	0.331879	0.239368	0.171247
37.3333	4.30431	4.65815	3.49035	0.332167	0.240967	0.173414
37.6667	4.30789	4.675	3.50587	0.33118	0.243237	0.173947
38	4.31431	4.67493	3.51082	0.330895	0.241437	0.173879
38.3333	4.32609	4.69451	3.52967	0.330659	0.242253	0.174936
38.6667	4.33983	4.70575	3.53645	0.331119	0.243153	0.176249
39	4.34976	4.7201	3.55717	0.332343	0.241223	0.176715
39.3333	4.34755	4.74366	3.57829	0.332282	0.244292	0.17878
39.6667	4.3453	4.75961	3.58351	0.332535	0.244121	0.180464
40	4.35207	4.77694	3.60107	0.33243	0.246517	0.180432
40.3333	4.34507	4.78529	3.60762	0.331534	0.245471	0.181449
40.6667	4.3736	4.81656	3.61514	0.334904	0.248646	0.184252
41	4.37023	4.81608	3.61939	0.334095	0.243454	0.183137
41.3333	4.37872	4.85437	3.63032	0.333671	0.247019	0.185322
41.6667	4.38403	4.86246	3.65312	0.334209	0.247185	0.184664
42	4.38729	4.86105	3.66077	0.332684	0.245243	0.185875
42.3333	4.38756	4.87054	3.67334	0.331291	0.244933	0.185696
42.6667	4.40777	4.88746	3.6809	0.331565	0.246059	0.186074
43	4.40868	4.89074	3.69227	0.332743	0.244854	0.187296
43.3333	4.40501	4.89301	3.69728	0.33251	0.245578	0.187307
43.6667	4.42526	4.90634	3.71088	0.333365	0.245547	0.187013
44	4.42515	4.92863	3.71351	0.334405	0.247106	0.187842
44.3333	4.42002	4.9477	3.72621	0.333521	0.245893	0.188095
44.6667	4.42119	4.9479	3.73854	0.332643	0.246332	0.190756
45	4.39402	4.96428	3.73606	0.339465	0.246229	0.192224
45.3333	4.4045	4.97758	3.75462	0.333402	0.246181	0.192363
45.6667	4.41521	4.97725	3.76782	0.332052	0.244134	0.192027
46	4.44892	4.97354	3.77808	0.333253	0.244395	0.193379
46.3333	4.44815	5.00722	3.78899	0.333626	0.244742	0.194483
46.6667	4.4702	5.03245	3.78911	0.339845	0.247153	0.19454
47	4.44156	5.0474	3.79654	0.319611	0.245964	0.193731
47.3333	4.39229	5.04752	3.80672	0.318576	0.244514	0.195582
47.6667	4.4679	5.04456	3.81223	0.33502	0.242077	0.194768
48	4.48683	5.04568	3.82342	0.341163	0.243343	0.195445
48.3333	4.48416	5.06063	3.84084	0.336765	0.244305	0.197969
48.6667	4.50359	5.0804	3.85476	0.342167	0.246275	0.19911
49	4.46102	5.08012	3.869	0.339286	0.245215	0.198944
49.3333	4.46031	5.08427	3.86974	0.328915	0.244756	0.198132
49.6667	4.5024	5.09838	3.8677	0.347313	0.244718	0.198222
50	4.50904	5.10384	3.86864	0.34248	0.245779	0.19786
50.3333	4.50279	5.10141	3.88164	0.336207	0.244035	0.198919
50.6667	4.5359	5.10611	3.89152	0.350074	0.244564	0.19956
51	4.53471	5.10686	3.90297	0.343318	0.246137	0.1993
51.3333	4.53076	5.12027	3.9025	0.342761	0.243165	0.200372
51.6667	4.53364	5.12877	3.91473	0.341854	0.244478	0.201401
52	4.54342	5.13224	3.91527	0.342689	0.243694	0.20115
52.3333	4.55197	5.14552	3.9241	0.342625	0.245387	0.203078
52.6667	4.55767	5.1393	3.93657	0.343748	0.246349	0.204123
53	4.55806	5.14788	3.95118	0.341462	0.243901	0.203563
53.3333	4.5617	5.15703	3.95821	0.343854	0.244008	0.20638
53.6667	4.564	5.17699	3.96777	0.344774	0.244546	0.206289
54	4.56517	5.18277	3.97532	0.346032	0.242814	0.206374
54.3333	4.57679	5.18755	3.98333	0.345838	0.243451	0.207832
54.6667	4.57195	5.19712	3.98868	0.345513	0.243729	0.207977
55	4.58555	5.20308	3.99788	0.345509	0.243725	0.207253
55.3333	4.59307	5.21006	4.00017	0.346466	0.241852	0.20878
55.6667	4.59829	5.21413	4.01066	0.347037	0.24104	0.209793
56	4.60814	5.22163	4.01668	0.349269	0.241321	0.210397
56.3333	4.61136	5.24151	4.0247	0.348746	0.24573	0.210608
56.6667	4.61504	5.22781	4.03123	0.348275	0.242692	0.210943
57	4.61755	5.24944	4.03484	0.349222	0.245487	0.210462
57.3333	4.62285	5.25526	4.0408	0.349027	0.244625	0.210548
57.6667	4.63144	5.25927	4.03981	0.349146	0.243079	0.211524
58	4.6355	5.26036	4.04657	0.349352	0.242059	0.21267
58.3333	4.63966	5.29133	4.07362	0.351175	0.246147	0.214703
58.6667	4.64195	5.29399	4.05933	0.350773	0.243425	0.215767
59	4.64799	5.28953	4.06976	0.350682	0.244537	0.216411
59.3333	4.65418	5.30723	4.07111	0.351268	0.244487	0.215664
59.6667	4.65776	5.2845	4.08977	0.35333	0.245038	0.216929
60	4.66279	5.32482	4.08671	0.354352	0.248015	0.217736
60.3333	4.66862	5.33741	4.09029	0.352742	0.248376	0.21744
60.6667	4.67134	5.34876	4.0901	0.353571	0.249811	0.217987
61	4.67977	5.36302	4.08402	0.355817	0.251449	0.217355
61.3333	4.69422	5.35547	4.07502	0.35591	0.251145	0.21893
61.6667	4.70234	5.37407	4.10257	0.357919	0.253937	0.217942
62	4.70583	5.35962	4.10529	0.359166	0.251322	0.217965
62.3333	4.70427	5.36979	4.10394	0.359004	0.248746	0.219287
62.6667	4.7162	5.39053	4.11223	0.3593	0.254789	0.220115
63	4.72601	5.37326	4.11579	0.359843	0.248043	0.221738
63.3333	4.73812	5.38397	4.11669	0.361003	0.251513	0.221459
63.6667	4.74768	5.39948	4.12995	0.363011	0.25511	0.220789
64	4.76056	5.41863	4.13021	0.366035	0.257288	0.22175
64.3333	4.77321	5.41483	4.14377	0.365812	0.257729	0.222367
64.6667	4.77729	5.41398	4.14712	0.367203	0.256803	0.222815
65	4.77381	5.42762	4.14064	0.366055	0.256645	0.223303

## Sheet: Source data Figure 7 F
Source data for Figure 7 F
Fluo. Intensity (A.U.) (PM EGFP-D4H)
Individual Values
WT			5P			T469D
min after Rapamycin			min after Rapamycin			min after Rapamycin
0	30	60	0	30	60	0	30	60
3.52357	1.54423	1.60677	2.09577	1.11377	2.81991	3.58055	2.91452	1.34542
3.67337	0.674292	0.613836	2.98488	1.8157	3.59662	2.31407	1.79353	1.45326
2.47234	2.07932	1.60151	2.37582	2.68047	3.47411	2.68074	2.50463	3.22687
3.01956	1.32492	1.14322	2.75868	3.22969	4.03144	1.42806	3.93788	0.674261
1.9171	2.44038	1.60732	1.95424	2.84526	2.20219	3.13873	3.05939	2.36609
2.22538	0.931697	1.51324	4.2594	1.22964	1.9131	1.90629	2.23355	1.39627
2.19808	0.931697	0.748174	4.33786	1.76628	2.18113	1.81288	1.62204	2.57758
1.81578	1.69335	3.43258	3.74251	1.4408	1.32972	2.13587	2.28058	2.0466
1.33643	1.22186	1.14415	1.51982	3.00925	3.22721	1.7854	3.79633	2.36633
3.71476	2.54399	1.63958	2.40347	3.29826	1.07163	2.81405	1.86136	1.79176
2.30774	2.31548	1.28537	1.99181	1.64014	1.45119	2.83812	1.86528	2.67049
2.06927	1.95986	1.69988	1.6046	1.59749	2.53923	2.38444	1.16206	2.19892
3.13457	1.61635	1.3431	3.13812	3.32066	3.84003	2.93815	2.52187	2.70815
2.23834	1.37748	1.3024	1.64439	2.29224	2.0004	2.90237	1.86028	2.26984
2.60313	2.07108	1.69778	2.87697	2.54558	0.853558	3.00488	2.55237	2.02519
3.43537	0.92467	2.23441	1.95454	2.71366	1.90478	3.27962	2.68103	1.65752
2.45159	0.757144	1.43543	1.47497	1.99318	2.14108	4.10507	2.10328	2.00174
2.25619	1.06619	1.27307	3.81645	3.12946	1.73017	3.40936	2.59535	2.50522
3.38284	1.83063	0.377378	1.52851	1.84379	1.82233	2.34301	1.40818	2.09231
2.06128	1.12268	0.81491	3.17969	3.80002	1.12774	2.53402	3.83125	4.12989
3.77009	0.861789	2.13393	1.9697	2.6622	2.89226	1.70459	1.33069	3.12001
1.42946	0.665887	1.60822	1.60765	2.17309	2.8584	1.57339	2.95968	3.19861
2.11543	1.98442	0.694588	1.27716	2.74178	2.69772	2.80011	3.24027	1.5964
2.35155	2.62353	1.44391	2.28298	2.81288	2.57804	2.99711	2.21143	2.02724
0.932005	1.3984	0.0333958	4.50626	1.42175	2.31578	2.15272	2.863	3.18256
2.76871	0.97372	1.7353	1.4994	1.81668	1.5066	2.33405	3.62105	4.00912
3.33003	1.80809	1.10233	3.38829	3.70926	1.70945	2.04182	3.3426	3.17081
2.51834	1.65109	2.68325	3.44915	2.59157	3.56594	2.84272	3.89808	2.67133
1.9601	0.87676	1.39687	2.97904	4.01216	4.89193	2.28779	2.32531	2.81364
3.75861	2.4357	0.908564	4.93813	2.12756	1.76559	2.55995	3.8823	2.64113
2.8557	1.7927	0.409055	1.71039	2.28696	5.3976	2.74055	3.04181	2.02663
1.77339	2.72923	1.48729	1.84112	2.65176	4.00908	2.28552	2.41763	2.23661
3.1582	1.93319	1.26518	1.8662	3.27016	4.55642	1.09655	2.15253	1.67798
2.9102	2.18486	2.1972	2.13034	5.45377	3.50987	2.10922	1.86043	1.20756
2.78699	1.72309	1.58872	2.60563	2.48089	1.77401	2.28351	1.269	1.44313
2.23305	1.42677	1.80189	1.96712	2.67643	2.23947	2.00709	2.65619	1.03536
1.76569	1.6342	2.17372	3.38666	2.08058	1.41386	1.97948	2.40465	1.46287
2.46231	2.34717	1.8109	4.10646	2.38431	2.13892	3.38541	1.21753	2.78968
3.35648	1.80316	0.976016	2.23725	3.21181	1.9819	2.78142	0.885883	3.30079
2.85806	1.69726	0.91348	1.92119	1.24595	1.94846	2.14104	2.84996	4.26326
